# Supplementary material for: Indole-bridged bisphosphine-monoxide palladium catalysts for ethylene polymerization and copolymerization with polar monomers
Source: Royal Society of Chemistry journal article supplement (doi:10.1039/d0py00100g), 2020-01-01
Supplement: d0py00100g1.pdf [file d0py00100g1.pdf]

## ESI

# Indole-bridged bisphosphine-monoxide palladium catalysts for ethylene polymerization and copolymerization with polar monomers

Kangkang Li,<sup>#,a,b</sup> Junhao Ye,<sup>#,a,b</sup> Zhen Wang,<sup>a</sup> Hongliang Mu<sup>\*a</sup> and Zhongbao Jian<sup>\*a</sup>

<sup>a</sup> State Key Laboratory of Polymer Physics and Chemistry, Changchun Institute of Applied Chemistry, Chinese Academy of Sciences, Renmin Street 5625, Changchun 130022, China.

<sup>b</sup> University of Science and Technology of China, Hefei 230026, China.

## Contents

|                                                                          |     |
|--------------------------------------------------------------------------|-----|
| 1. Preparation of ligands <b>1a-1g</b>                                   | S1  |
| 2. NMR spectra of ligands and complexes                                  | S8  |
| 3. NMR spectra of (co)polymers                                           | S26 |
| 4. GPC traces and DSC data of (co)polymers                               | S43 |
| 5. Topographic steric maps of palladium catalysts <b>2e</b> and <b>G</b> | S69 |
| 6. Crystallographic data for <b>2c</b> , <b>2e</b> and <b>2f</b>         | S70 |

## 1. Preparation of Ligands 1a-1g

### Preparation of S<sub>1</sub>:

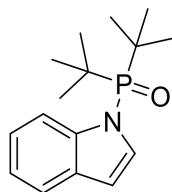

Indole (1.17 g, 10 mmol, 1.0 equiv) was stirred in tetrahydrofuran (50 mL) and the mixture was cooled to  $-78\text{ }^{\circ}\text{C}$ . *n*-BuLi (6.56 mL, 1.6 M in hexane, 10.5 mmol, 1.05 equiv) was slowly added and the mixture was stirred for 4 h at  $-78\text{ }^{\circ}\text{C}$  ensuring the temperature did not change. Di-tert-butylchlorophosphane (1.8 g, 10 mmol, 1.0 equiv) was then added dropwise and the mixture was stirred for 2 h at  $-78\text{ }^{\circ}\text{C}$ . The reaction mixture was allowed to warm slowly to room temperature and stirred overnight. The salts were removed by extraction with  $\text{CH}_2\text{Cl}_2$  (30 mL) and distilled water (30 mL). To the organic layer was added  $\text{H}_2\text{O}_2$  (2 mL, 30 %) and stirred for 3 h. The mixture was concentrated and pure red solid (1.66 g, 6 mmol, 60 %) was obtained by silica gel column chromatography (ethyl acetate: hexane = 1:2).

<sup>1</sup>H NMR (500 MHz,  $\text{CDCl}_3$ ):  $\delta$  8.50 (d,  $J = 8.5\text{ Hz}$ , 1H), 7.58 (d,  $J = 7.6\text{ Hz}$ , 1H), 7.26 – 7.19 (m, 2H), 7.20 – 7.15 (m, 1H), 6.75 – 6.65 (m, 1H).

### Preparation of Ligand 1a:

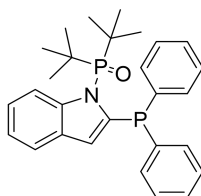

Lithium diisopropylamide (2.16 mL, 2 M in THF/*n*-heptane ethylbenzene, 4.32 mmol, 2.0 equiv) was slowly added to a solution of S<sub>1</sub> (0.60 g, 2.16 mmol, 1.0 equiv) in THF (50 mL) at  $0\text{ }^{\circ}\text{C}$ . The mixture was stirred for 4 h at  $0\text{ }^{\circ}\text{C}$  and then chlorodiphenylphosphine (0.478 g, 2.16 mmol, 1.0 equiv) was added dropwise and the mixture was stirred for 2 h at  $0\text{ }^{\circ}\text{C}$ . The reaction mixture was allowed to warm slowly to room temperature and stirred overnight. The salts were removed by extraction with  $\text{CH}_2\text{Cl}_2$  (30 mL) and distilled water (30 mL) and the organic layer was concentrated under reduced pressure. After purification by column chromatography on silica gel (1:4 ethyl acetate: hexane), white powder product (0.51 g, 1.10 mmol, 51 %) was obtained.

<sup>1</sup>H NMR (500 MHz,  $\text{CDCl}_3$ ):  $\delta$  7.66 (d,  $J_{\text{HH}} = 8.4\text{ Hz}$ , 1H), 7.43 (m, 5H), 7.32 (d,  $J_{\text{HH}} = 4.7\text{ Hz}$ , 6H), 7.20 (t,  $J_{\text{HH}} = 7.9\text{ Hz}$ , 1H), 7.13 (t,  $J_{\text{HH}} = 7.4\text{ Hz}$ , 1H), 6.17 (s, 1H), 1.32 (d,  $J_{\text{HH}} = 15.2\text{ Hz}$ , 18H).

<sup>1</sup>P{<sup>1</sup>H} NMR (202 MHz,  $\text{CDCl}_3$ ):  $\delta$  69.47 (P=O), -16.08 (P-aryl).

### Preparation of Ligand 1b:

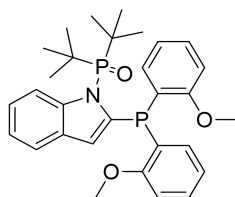

Similar procedure as above was used except that bis(2-methoxyphenyl)chlorophosphine (0.508 g, 1.8 mmol, 1.0 equiv) was used. **1b** was obtained as a light white powder (0.37 g, 40 %).

**<sup>1</sup>H NMR** (500 MHz, CDCl<sub>3</sub>): δ 7.71 (d, *J*<sub>HH</sub> = 8.4 Hz, 1H), 7.39 (d, *J*<sub>HH</sub> = 7.8 Hz, 1H), 7.30 – 7.25 (m, 2H), 7.20 – 7.15 (m, 1H), 7.10 (t, *J*<sub>HH</sub> = 7.2 Hz, 1H), 6.87 – 6.77 (m, 6H), 6.16 (s, 1H), 3.66 (s, 6H), 1.42 (d, *J*<sub>HH</sub> = 15.0 Hz, 18H).

**<sup>31</sup>P{<sup>1</sup>H} NMR** (202 MHz, CDCl<sub>3</sub>): δ 67.92 (*P*=O), -36.26 (*P*-aryl).

### Preparation of Ligand 1c:

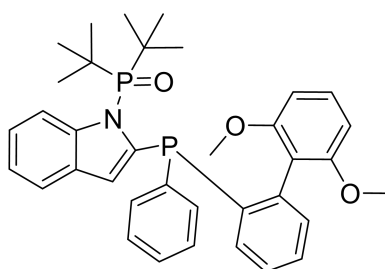

Similar procedure as above was used except that (2', 6'-dimethoxybiphenyl-2-yl)phenylphosphine chloride (0.745 g, 2.09 mmol, 1.0 equiv) was used. The reaction mixture was separated and purified by column chromatography on silica gel (1:2 ethyl acetate: hexane), and **1c** was obtained as a light red solid powder (0.56 g, 45 %).

**<sup>1</sup>H NMR** (500 MHz, CDCl<sub>3</sub>): δ 7.59 – 7.52 (m, 1H), 7.44 – 7.35 (m, 4H), 7.29 – 7.26 (m, 2H), 7.25 – 7.18 (m, 2H), 7.16 (ddd, *J*<sub>HH</sub> = 1.3, 3.9, 7.5 Hz, 1H), 7.13 – 7.05 (m, 3H), 6.90 – 6.84 (m, 1H), 6.56 (dd, *J*<sub>HH</sub> = 0.8, 8.3 Hz, 1H), 6.27 – 6.20 (m, 2H), 3.86 (s, 3H), 3.11 (s, 3H), 1.19 (d, *J*<sub>HH</sub> = 14.8 Hz, 8H), 1.04 (d, *J*<sub>HH</sub> = 15.3 Hz, 8H).

**<sup>31</sup>P{<sup>1</sup>H} NMR** (202 MHz, CDCl<sub>3</sub>): δ 67.93 (*P*=O), -21.0 (*P*-aryl).

### Preparation of Ligand 1d:

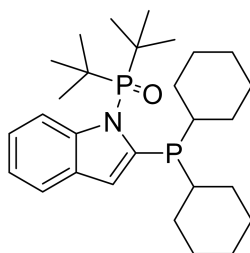

Similar procedure as above was used except that dicyclohexylchlorophosphine (0.41 g, 1.76 mmol, 1.0 equiv) was used. **1d** was obtained as a light white powder (0.33 g, 40 %).

**<sup>1</sup>H NMR** (500 MHz, CDCl<sub>3</sub>): δ 7.72 – 7.61 (m, 1H), 7.58 – 7.54 (m, 1H), 7.18 – 7.10 (m, 2H), 6.82 (s, 1H), 1.94 – 1.60 (m, 22H), 1.39 (d,  $J_{\text{HH}} = 15.1$  Hz, 18H).

**<sup>31</sup>P{<sup>1</sup>H} NMR** (202 MHz, CDCl<sub>3</sub>): δ 67.18 ( $P=O$ ), -6.40 ( $P\text{-Cy}$ ).

### Preparation of S<sub>2</sub>:

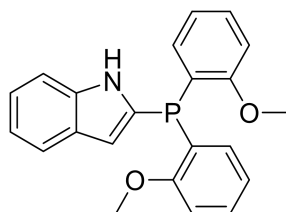

Ligand **1g** (1.0 g, 2 mmol, 1.0 equiv) was stirred in dimethyl sulfoxide (50 mL) and the mixture was heated to 80 °C. Aqueous solution (2.0 M, 32 mL, 16 mmol, 8 equiv) of sodium hydroxide was added and the mixture was stirred for 12 h at 80 °C. The salts were removed by extraction with diethyl ether (150 mL) and distilled water (100 mL) and the organic layer was concentrated under reduced pressure. After purification by column chromatography on silica gel (1:3.5 ethyl acetate: hexane), target compound was obtained as yellow powder (0.5 g, 1.38 mmol, 69 %).

**<sup>1</sup>H NMR** (500 MHz, CDCl<sub>3</sub>): δ 8.14 (s, 1H), 7.61 (d,  $J = 7.9$  Hz, 1H), 7.39 – 7.33 (m, 2H), 7.30 (d,  $J = 8.1$  Hz, 1H), 7.20 – 7.14 (m, 1H), 7.12 – 7.06 (m, 1H), 6.93 – 6.83 (m, 6H), 6.79 – 6.75 (m, 1H), 3.72 (s, 6H).

**<sup>31</sup>P{<sup>1</sup>H} NMR** (202 MHz, CDCl<sub>3</sub>): δ -45.92.

### Preparation of Ligand 1e:

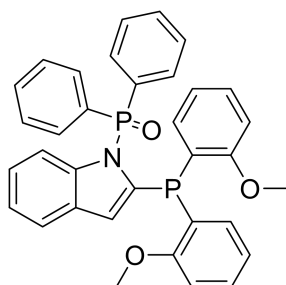



S<sub>2</sub> (0.50 g, 1.4 mmol, 1.0 equiv) was stirred in tetrahydrofuran (50 mL) and the mixture was cooled to -78 °C. *n*-BuLi (0.63 mL, 2.4 M in hexane, 1.5 mmol, 1.1 equiv) was slowly added and the mixture was stirred for 4 h at -78 °C ensuring the temperature did not change. Diphenylphosphinyl chloride (0.36 g, 1.5 mmol, 1.1 equiv) was then added dropwise and the mixture was stirred for 2 h at -78 °C. The reaction mixture was allowed to warm slowly to room temperature and stirred overnight. The salts were removed by extraction with CH<sub>2</sub>Cl<sub>2</sub> (30 mL) and distilled water (30 mL) under air and the organic layer was concentrated under reduced pressure. Yellow solid product (0.47 g, 0.84 mmol, 60 %) was obtained after purification by silica gel column chromatography (1:2 ethyl acetate: hexane).

<sup>1</sup>H NMR (500 MHz, CDCl<sub>3</sub>): δ 8.32 (d, *J* = 8.3 Hz, 1H), 7.85 – 7.68 (m, 4H), 7.43 – 7.37 (m, 4H), 7.32 – 7.19 (m, 5H), 7.18 – 7.12 (m, 2H), 6.79 (t, *J* = 7.4 Hz, 2H), 6.74 – 6.72 (m, 2H), 6.66 – 6.64 (m, 2H), 6.26 (dd, *J*<sub>HH</sub> = 0.9, 2.6 Hz, 1H), 3.64 (s, 6H).

<sup>31</sup>P{<sup>1</sup>H} NMR (202 MHz, CDCl<sub>3</sub>): δ 30.43 (d, *J* = 3.3 Hz, *P*=O), -44.65 (*P*-aryl).

### Preparation of S<sub>3</sub>:

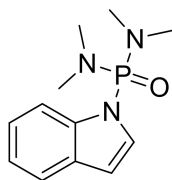

Indole (2.34 g, 20 mmol, 1.0 equiv) was stirred in tetrahydrofuran (50 mL) and the mixture was cooled to -78 °C. *n*-BuLi (8.8 mL, 2.4 M in hexane, 21 mmol, 1.05 equiv) was slowly added and the mixture was stirred for 4 h at -78 °C ensuring the temperature did not change. Bis(dimethylamino)phosphoryl chloride (3.43g, 20 mmol, 1.0 equiv) was then added dropwise and the mixture was stirred for 2 h at -78 °C. The reaction mixture was allowed to warm slowly to room temperature and stirred overnight. CH<sub>2</sub>Cl<sub>2</sub> was added and the mixture was washed with distilled water (30 mL). The organic layer was concentrated under reduced pressure, and white powder (2.66 g, 10.6 mmol, 53 %) was obtained.

<sup>1</sup>H NMR (500 MHz, CDCl<sub>3</sub>): δ 7.92 (d, *J* = 8.4 Hz, 1H), 7.59 (d, *J* = 7.7 Hz, 1H), 7.27 – 7.23 (m, 2H), 7.18 (t, *J* = 7.5 Hz, 1H), 6.62 (t, *J* = 2.7 Hz, 1H), 2.71 (d, *J* = 10.2 Hz, 13H).

<sup>31</sup>P{<sup>1</sup>H} NMR (202 MHz, CDCl<sub>3</sub>): δ 14.71 (*P*=O).

### Preparation of Ligand 1f:

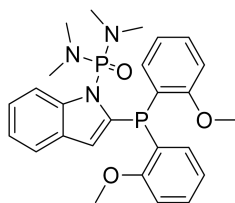

Lithium diisopropylamide (1.99 mL, 2 M in THF/n-heptane ethylbenzene, 1.99 mmol, 2.0 equiv) was slowly added to a solution of **S<sub>3</sub>** (0.50 g, 1.99 mmol, 1.0 equiv) in THF (50 mL) at 0 °C. The mixture was stirred for 4 h at 0 °C and then chlorobis(2-methoxyphenyl)phosphine (0.56 g, 1.99 mmol, 1.0 equiv) was added dropwise and the mixture was stirred for 2 h at 0 °C. The reaction mixture was allowed to warm slowly to room temperature and stirred overnight. CH<sub>2</sub>Cl<sub>2</sub> was added and the mixture was washed with distilled water (30 mL). The organic layer was concentrated under reduced pressure, and the residue was purified by column chromatography on silica gel (1:2 ethyl acetate: hexane) to afford ligand **1f** as white solid product (0.44 g, 1.10 mmol, 45 %).

**<sup>1</sup>H NMR** (500 MHz, CDCl<sub>3</sub>): δ 8.32 (dd, *J*<sub>HH</sub> = 1.0, 8.5 Hz, 1H), 7.42 – 7.30 (m, 3H), 7.27 – 7.16 (m, 1H), 7.17 – 7.10 (m, 1H), 6.93 – 6.74 (m, 6H), 6.16 (dd, *J*<sub>HH</sub> = 0.8, 2.9 Hz, 1H), 3.71 (s, 6H), 2.52 (d, *J*<sub>HH</sub> = 10.0 Hz, 12H).

**<sup>31</sup>P{<sup>1</sup>H} NMR** (202 MHz, CDCl<sub>3</sub>): δ 16.43 (*P*=O), -43.77 (*P*-aryl).

### Preparation of **S<sub>3</sub>**:

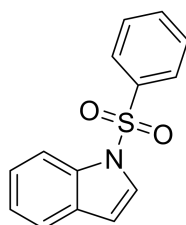

Indole (2.34 g, 20 mmol, 1.0 equiv) was stirred in tetrahydrofuran (50 mL) and the mixture was cooled to -78 °C. *n*-BuLi (8.8 mL, 2.4 M in hexane, 21 mmol, 1.05 equiv) was slowly added and the mixture was stirred for 4 h at -78 °C ensuring the temperature did not change. Benzenesulfonyl chloride (3.53g, 20 mmol, 1.0 equiv) was then added dropwise and the mixture was stirred for 2 h at -78 °C. The reaction mixture was allowed to warm slowly to room temperature and stirred overnight. The salts were removed by extraction with diethyl ether (30 mL) and distilled water (30 mL) under air and the organic layer was concentrated under reduced pressure. And the mixture was separated and purified by column chromatography on silica gel (1:2 ethyl acetate: hexane) to afford red solid product (3.6 g, 14.0 mmol, 70 %).

**<sup>1</sup>H NMR** (500 MHz, CDCl<sub>3</sub>): δ 7.91 (d, *J* = 8.3 Hz, 1H), 7.79 – 7.72 (m, 2H), 7.46 (d, *J* = 3.7 Hz, 1H), 7.41 (d, *J* = 7.8 Hz, 1H), 7.39 – 7.32 (m, 1H), 7.31 – 7.24 (m, 2H), 7.24 – 7.17 (m, 1H), 7.14 – 7.10 (m, 1H), 6.54 (d, *J* = 3.6 Hz, 1H).

### Preparation of Ligand 1g:

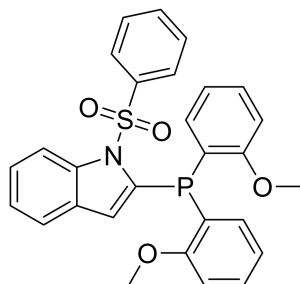

**S<sub>3</sub>** (1.78 g, 6.9 mmol, 1.0 equiv) was stirred in tetrahydrofuran (50 mL) and the mixture was cooled to  $-78\text{ }^{\circ}\text{C}$ . *n*-BuLi (3.16 mL, 2.4 M in hexane, 7.6 mmol, 1.1 equiv) was slowly added and the mixture was stirred for 4 h at  $-78\text{ }^{\circ}\text{C}$  ensuring the temperature did not change. Chlorobis(2-methoxyphenyl)phosphine (2.14 g, 7.6 mmol, 1.1 equiv) was then added dropwise and the mixture was stirred for 2 h at  $-78\text{ }^{\circ}\text{C}$ . The reaction mixture was allowed to warm slowly to room temperature and stirred overnight. The salts were removed by extraction with  $\text{CH}_2\text{Cl}_2$  (30 mL) and distilled water (30 mL) and the organic layer was concentrated under reduced pressure. The mixture was separated and purified by column chromatography on silica gel (1:2 ethyl acetate: hexane) to afford yellow solid product (2.07 g, 4.13 mmol, 60 %).

**$^1\text{H}$  NMR** (500 MHz,  $\text{CDCl}_3$ ):  $\delta$  8.27 – 8.20 (m, 3H), 7.56 – 7.51 (m, 1H), 7.49 – 7.41 (m, 2H), 7.40 – 7.27 (m, 4H), 7.21 – 7.15 (m, 1H), 6.92 – 6.87 (m, 4H), 6.87 – 6.82 (m, 2H), 6.09 (s, 1H), 3.69 (s, 6H).

**$^{31}\text{P}\{^1\text{H}\}$  NMR** (202 MHz,  $\text{CDCl}_3$ ):  $\delta$  -38.94 (P-aryl).

## 2. NMR spectra of ligands and complexes

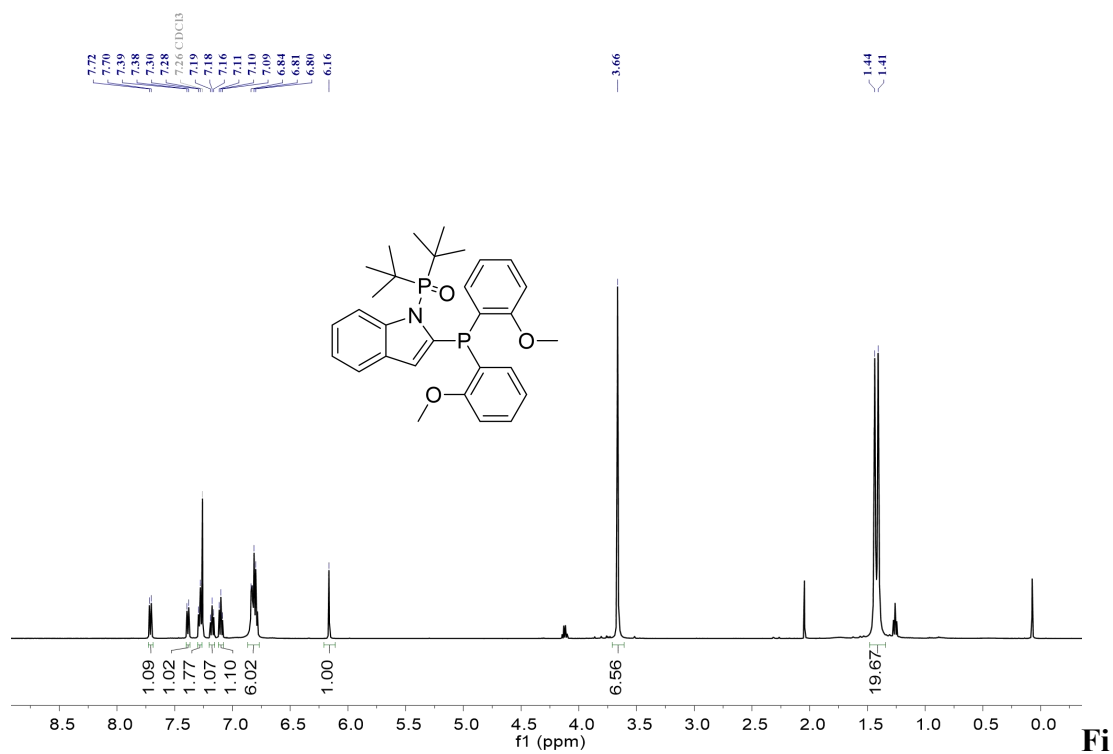

Figure S1. <sup>1</sup>H NMR (500 MHz, 298 K, CDCl<sub>3</sub>) of **1b**.

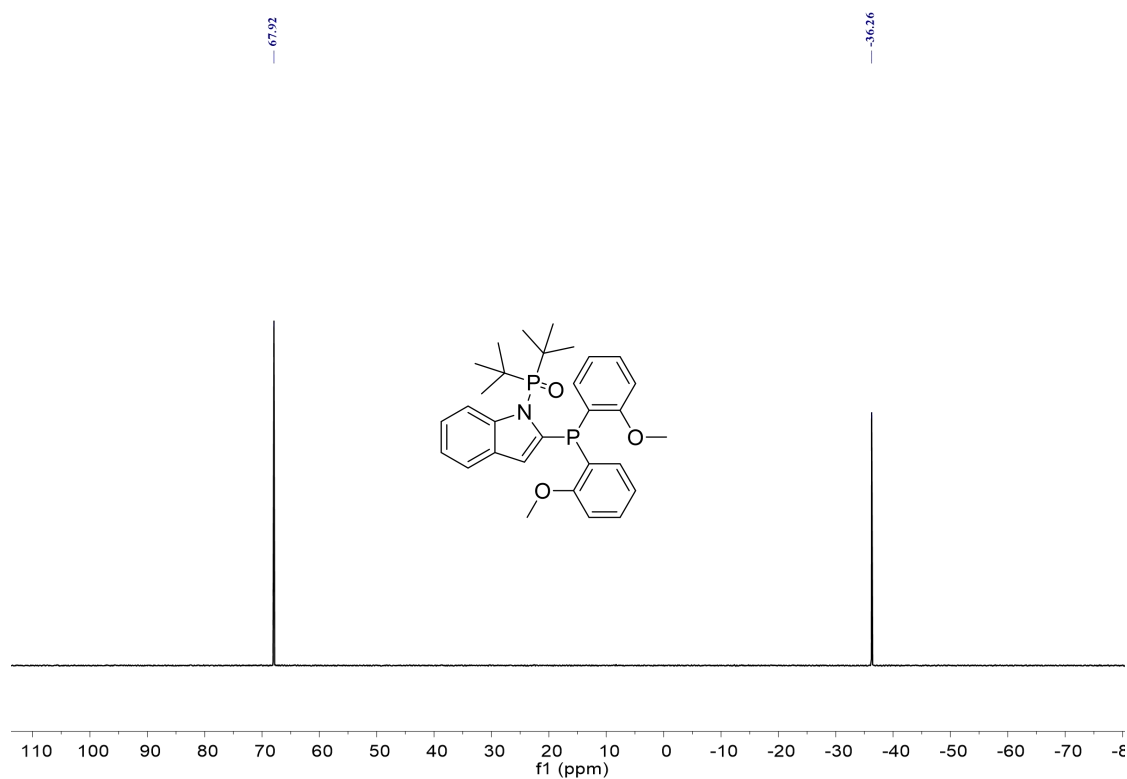

Figure S2. <sup>31</sup>P NMR spectrum (202 MHz, 298 K, CDCl<sub>3</sub>) of **1b**.

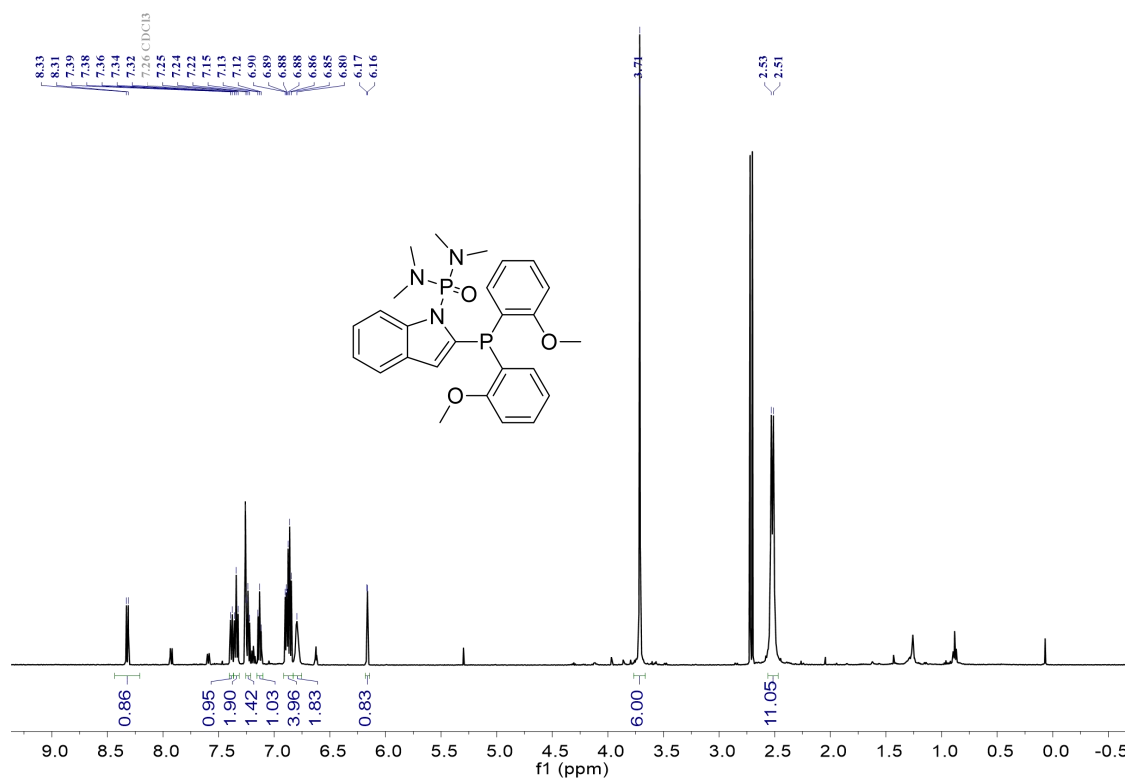

**Figure S3.** <sup>1</sup>H NMR (500 MHz, 298 K, CDCl<sub>3</sub>) of **1f**.

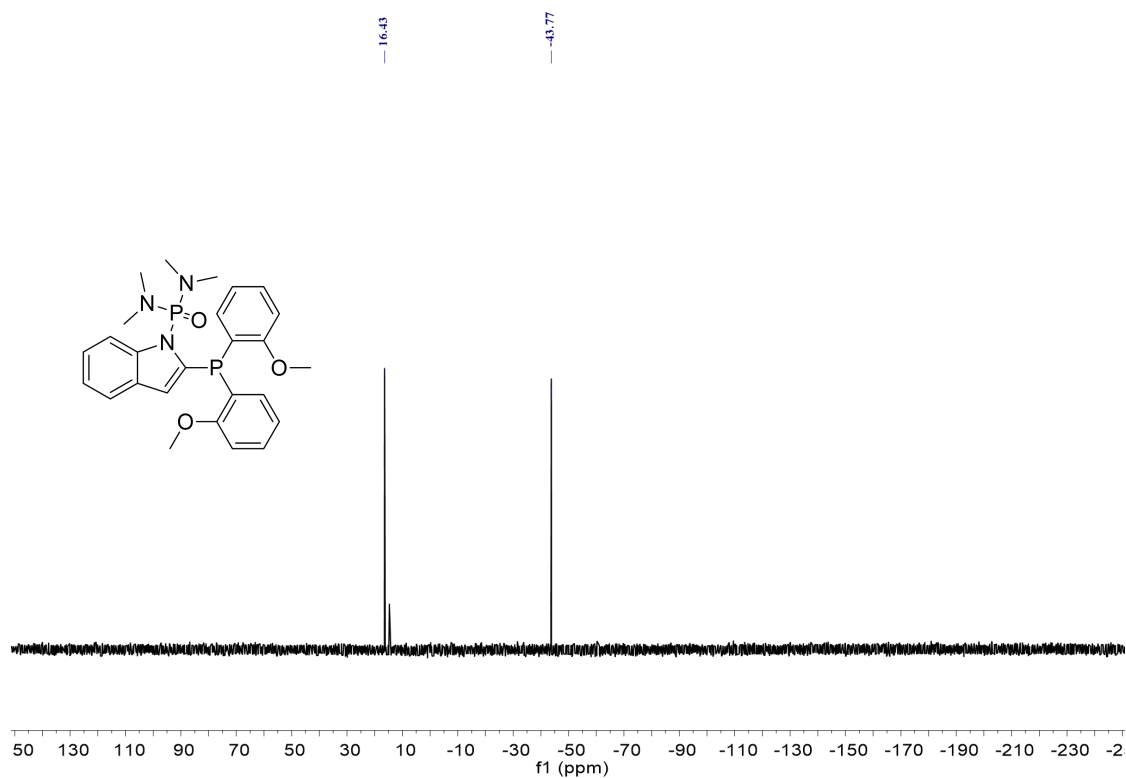

**Figure S4.** <sup>31</sup>P NMR spectrum (202 MHz, 298 K, CDCl<sub>3</sub>) of **1f**.

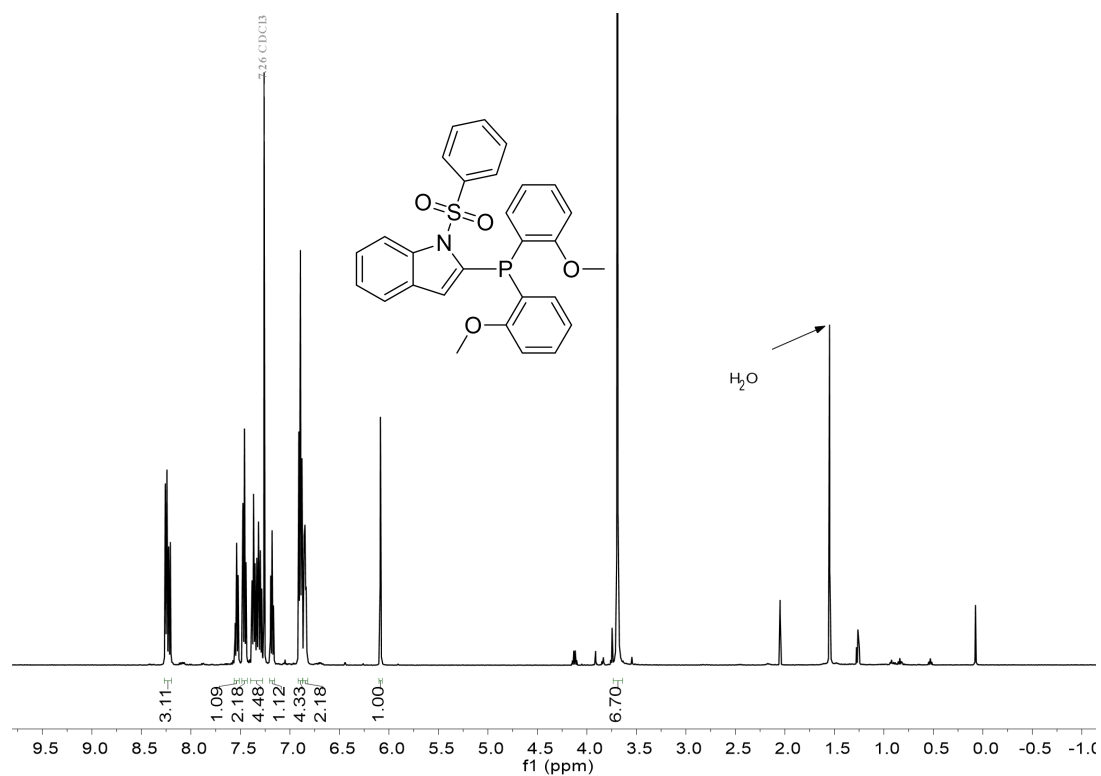

**Figure S5.** <sup>1</sup>H NMR (500 MHz, 298 K, CDCl<sub>3</sub>) of **1g**.

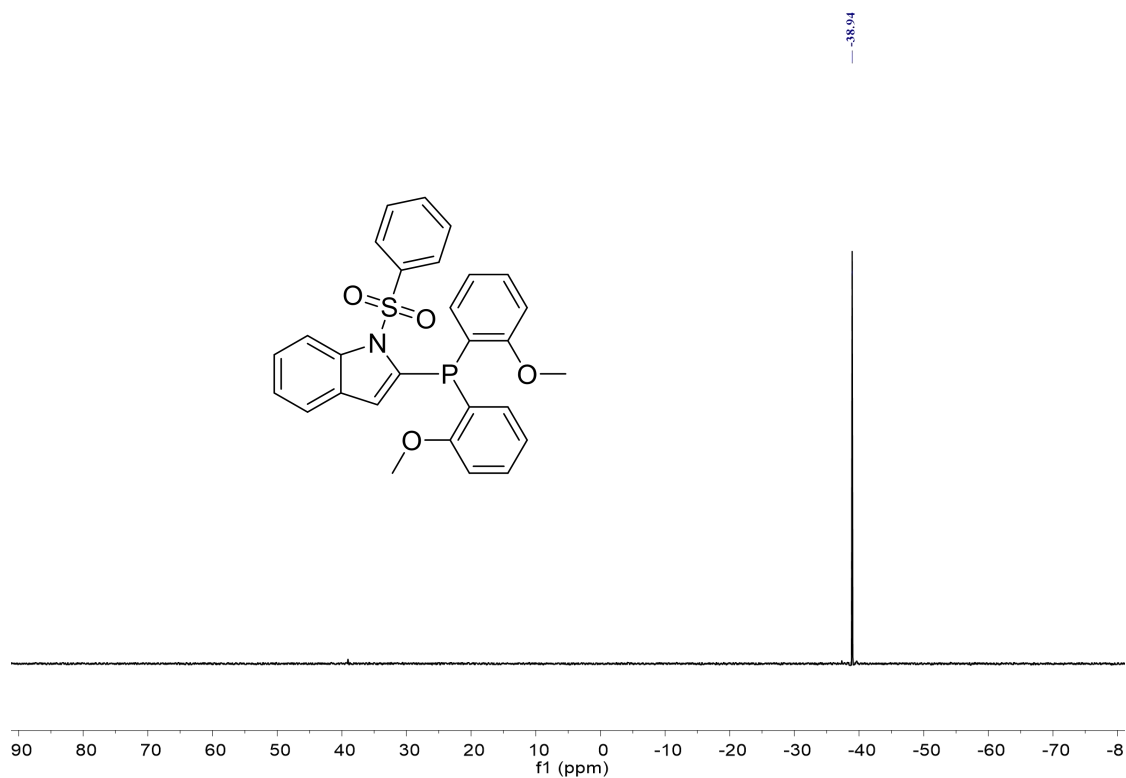

**Figure S6.** <sup>31</sup>P NMR spectrum (202 MHz, 298 K, CDCl<sub>3</sub>) of **1g**.

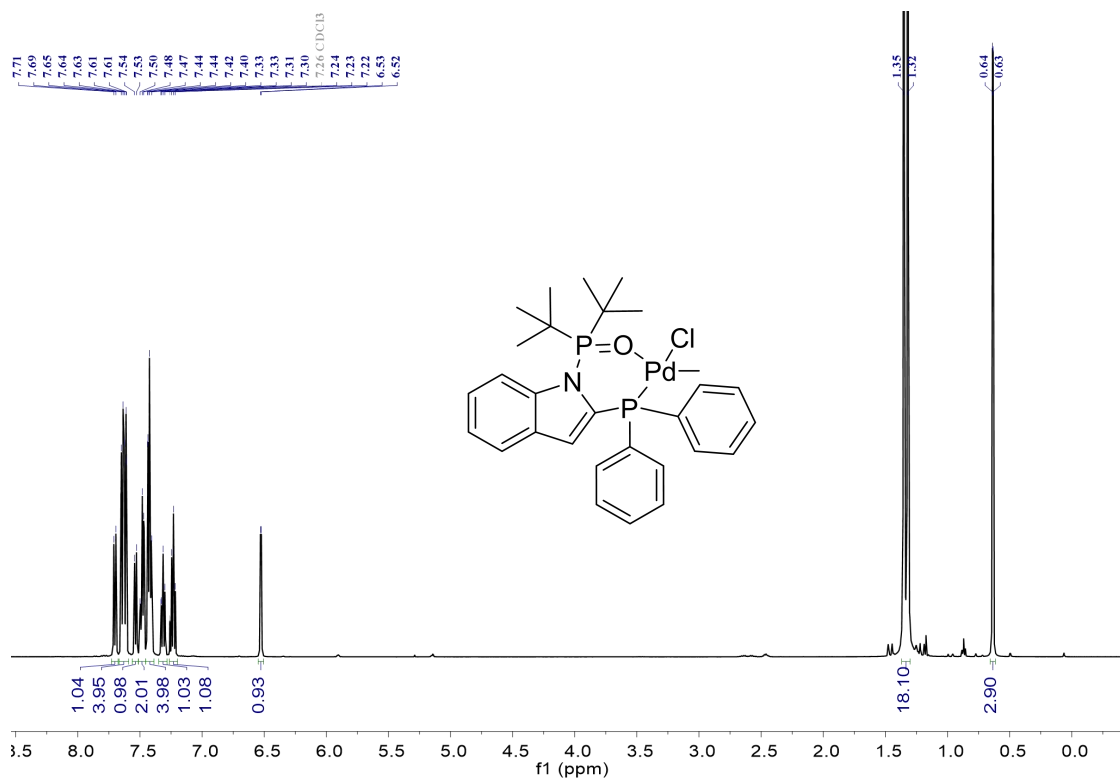

**Figure S7.** <sup>1</sup>H NMR (400 MHz, 298 K, CDCl<sub>3</sub>) of **2a**.

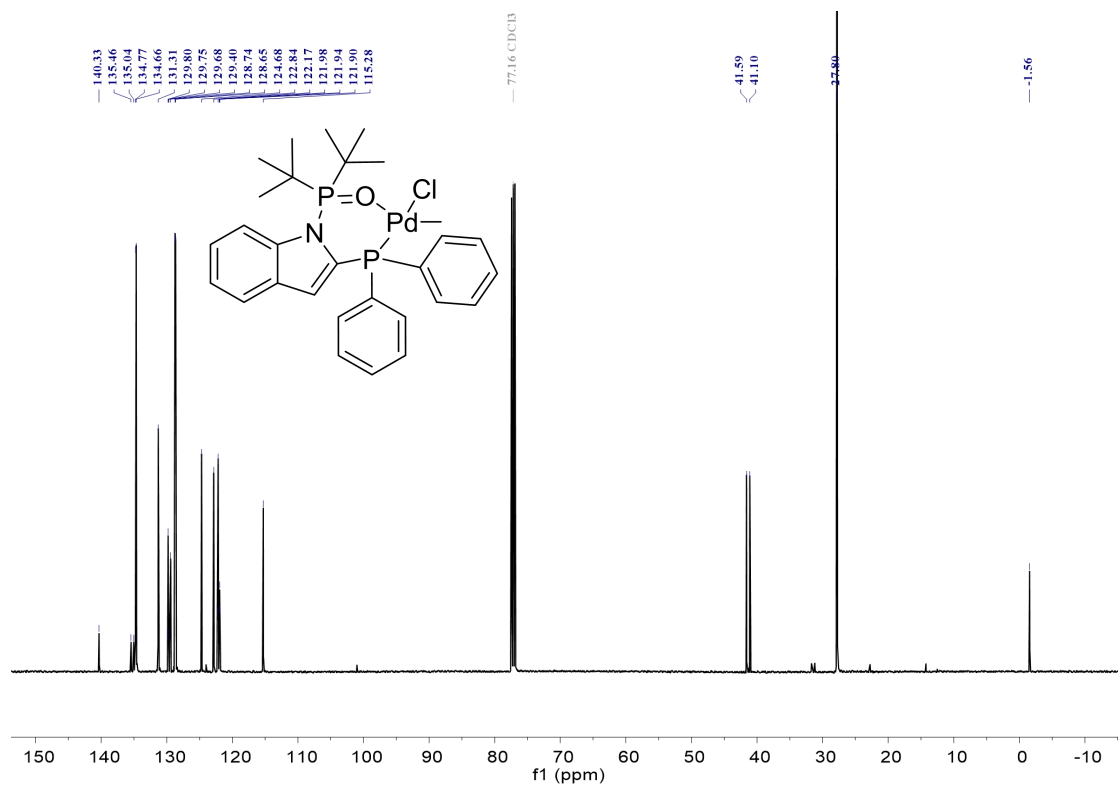

**Figure S8.** <sup>13</sup>C NMR (126 MHz, 298 K, CDCl<sub>3</sub>) of **2a**.

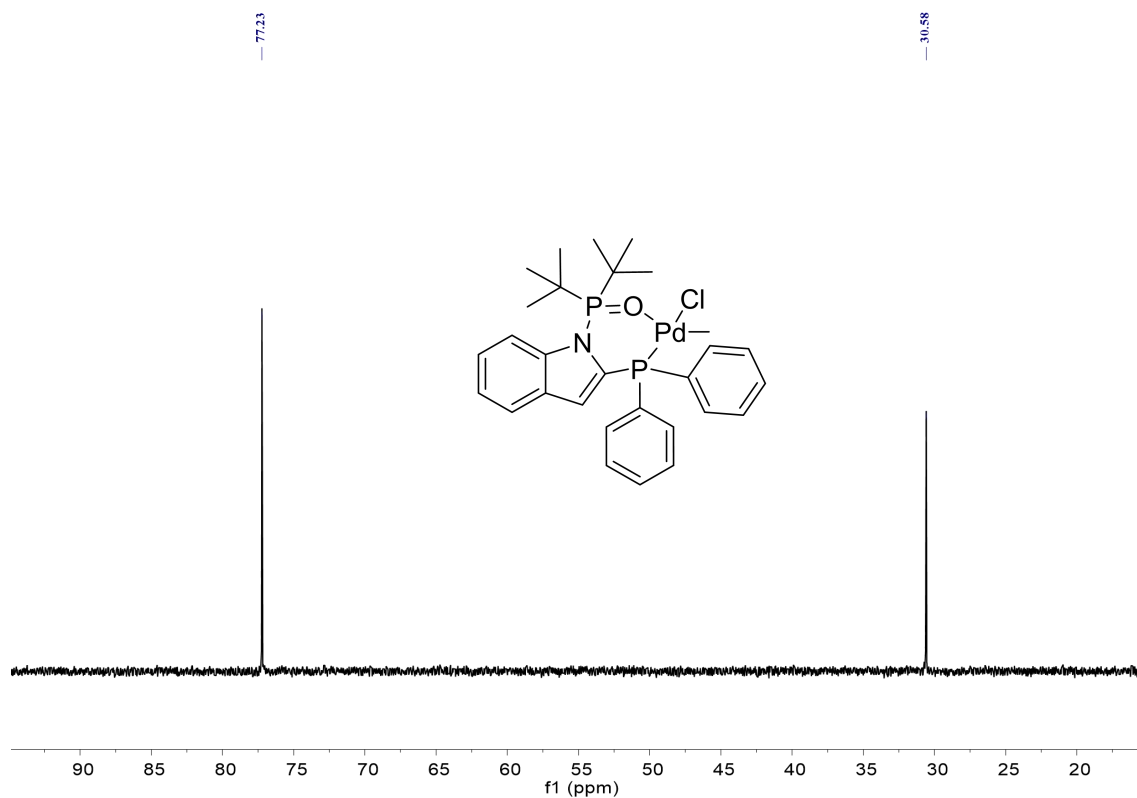

**Figure S9.**  $^{31}\text{P}$  NMR (162 MHz, 298 K,  $\text{CDCl}_3$ ) of **2a**.

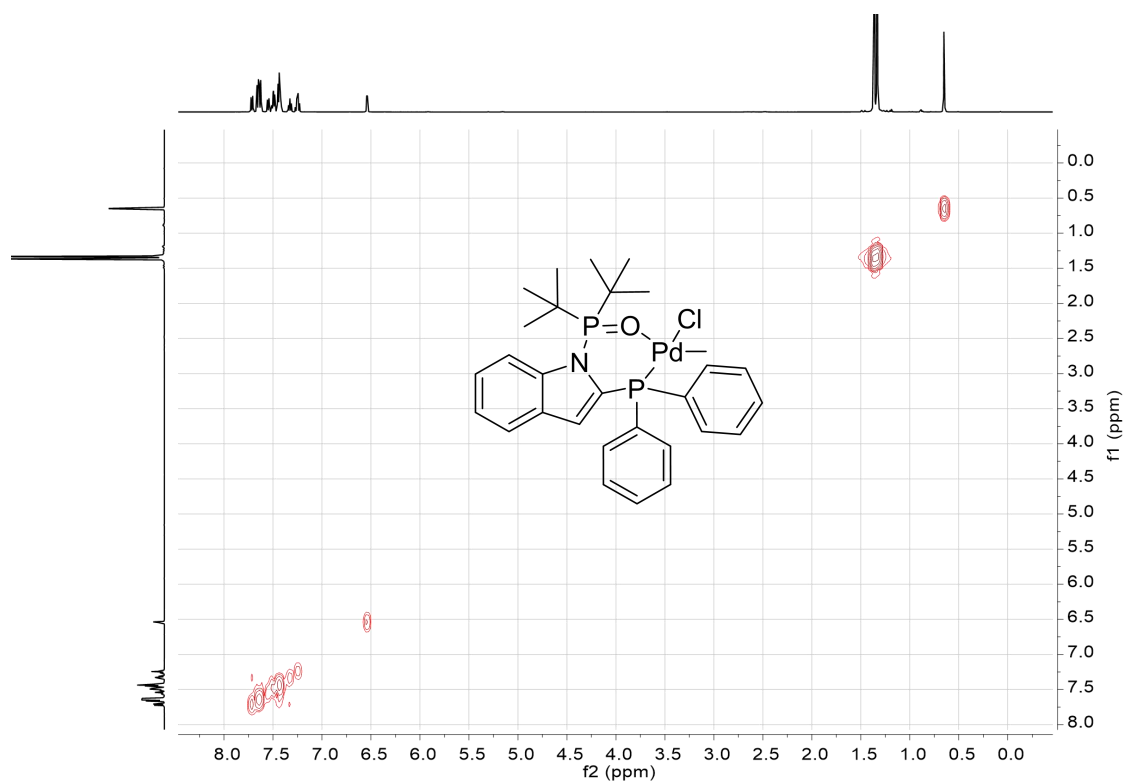

**Figure S10.**  $^1\text{H}$ - $^1\text{H}$  COSY spectrum (500 MHz, 298 K,  $\text{CDCl}_3$ ) of **2a**.



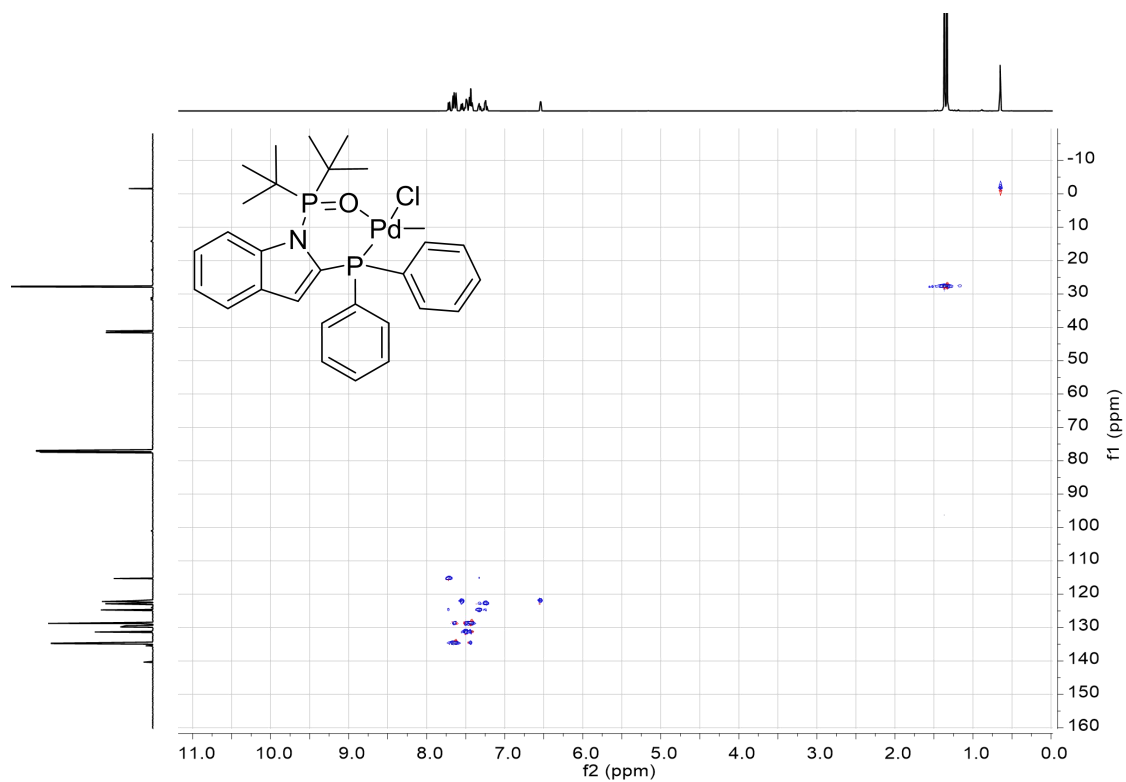

**Figure S11.**  $^1\text{H}$ - $^{13}\text{C}$  HSQC spectrum (500 MHz, 298 K,  $\text{CDCl}_3$ ) of **2a**.

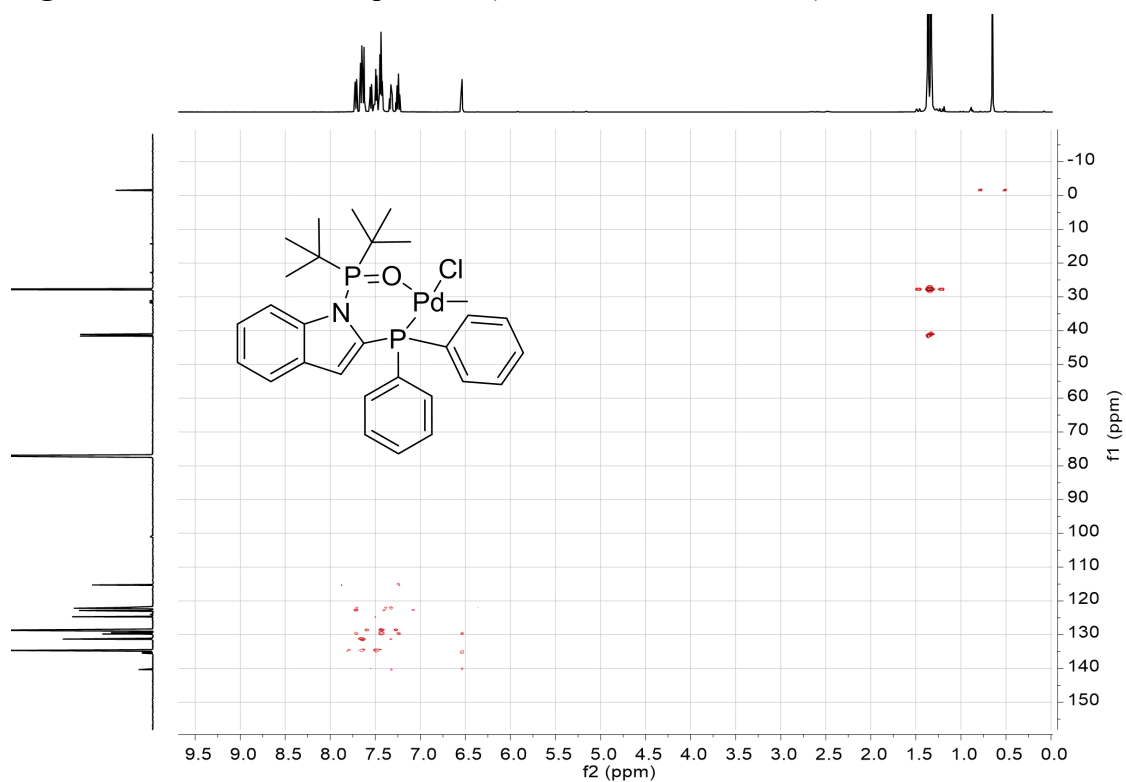

**Figure S12.**  $^1\text{H}$ - $^{13}\text{C}$  HMBC spectrum (500 MHz, 298 K,  $\text{CDCl}_3$ ) of **2a**.

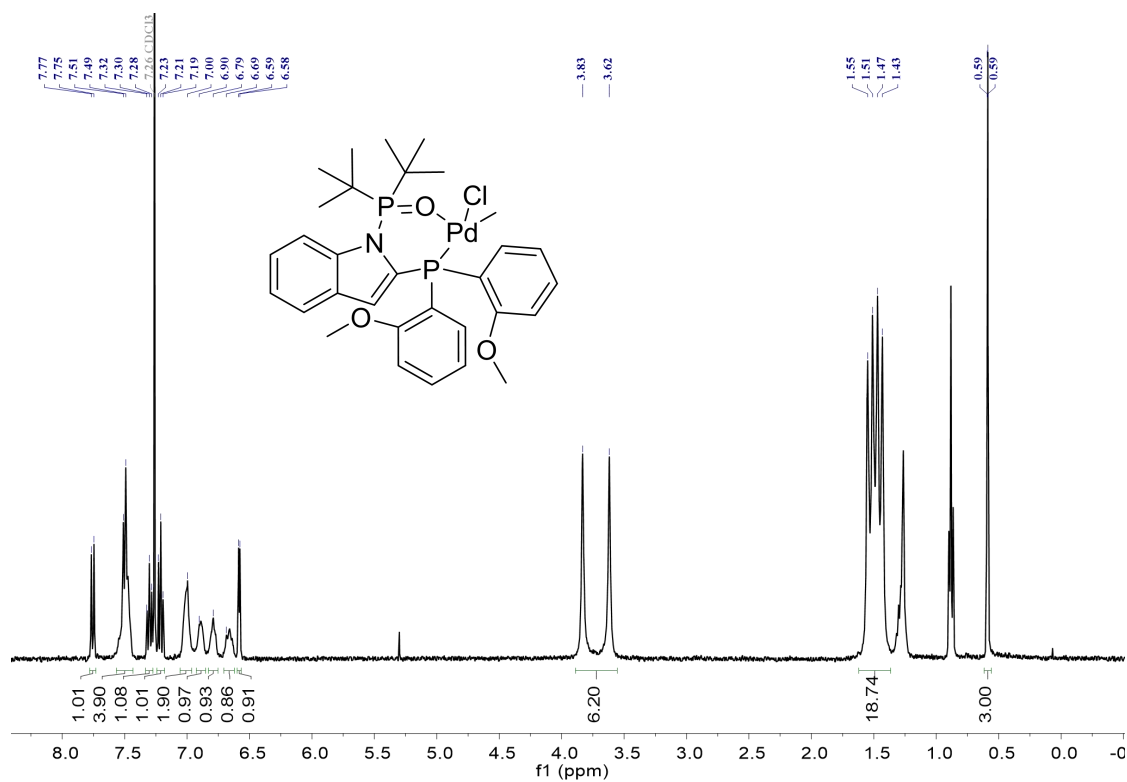

**Figure S13.** <sup>1</sup>H NMR (400 MHz, 298 K, CDCl<sub>3</sub>) of **2b**

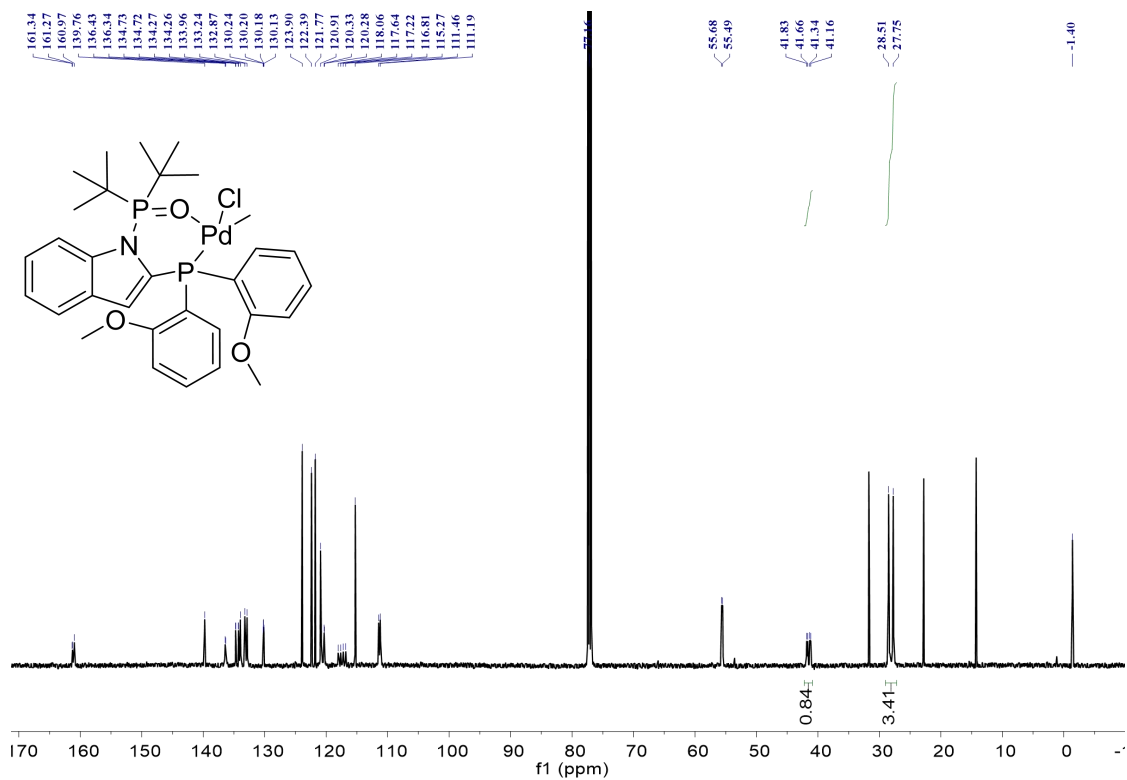

**Figure S14.** <sup>13</sup>C NMR (126 MHz, 298 K, CDCl<sub>3</sub>) of **2b**.

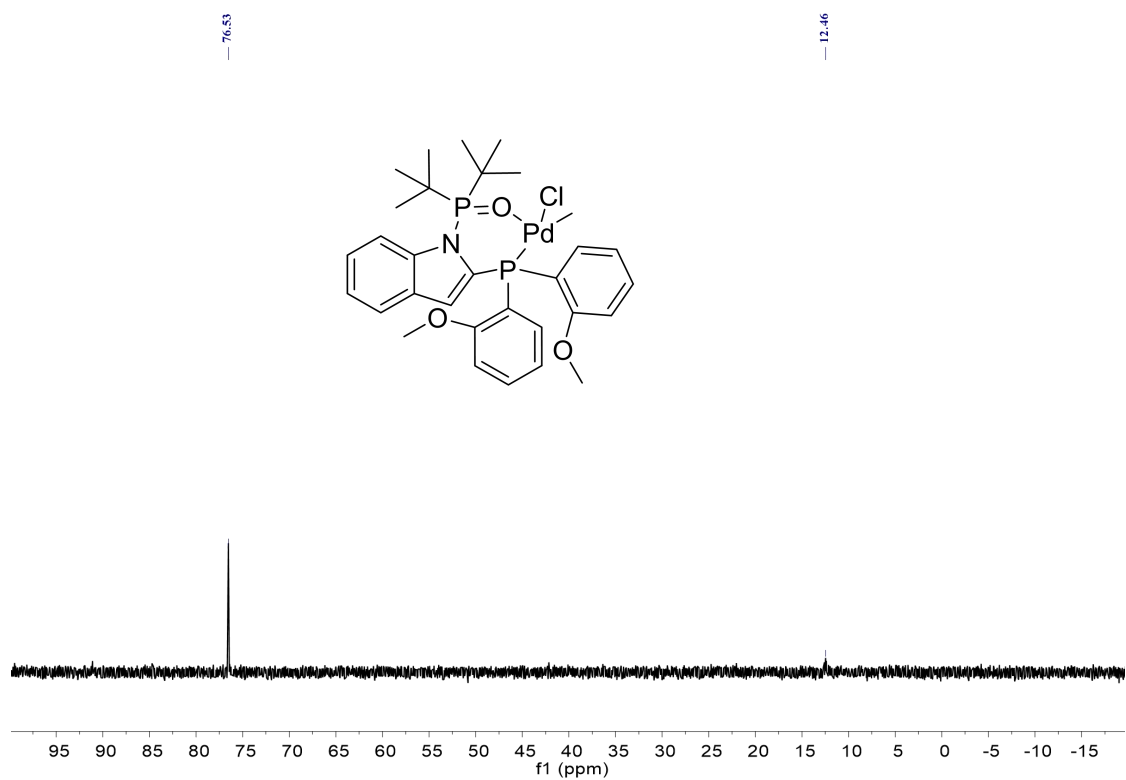

**Figure S15.**  $^{31}\text{P}$  NMR spectrum (162 MHz, 298 K,  $\text{CDCl}_3$ ) of **2b**.

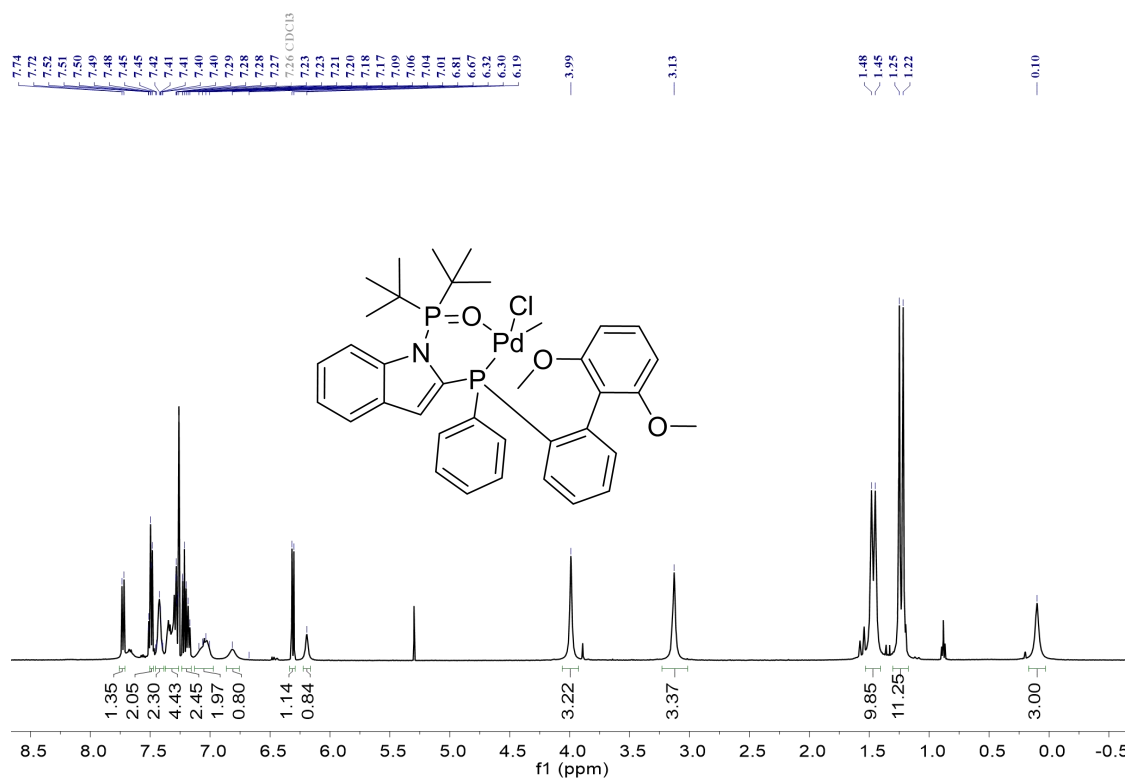

**Figure S16.**  $^1\text{H}$  NMR (500 MHz, 298 K,  $\text{CDCl}_3$ ) of **2c**.

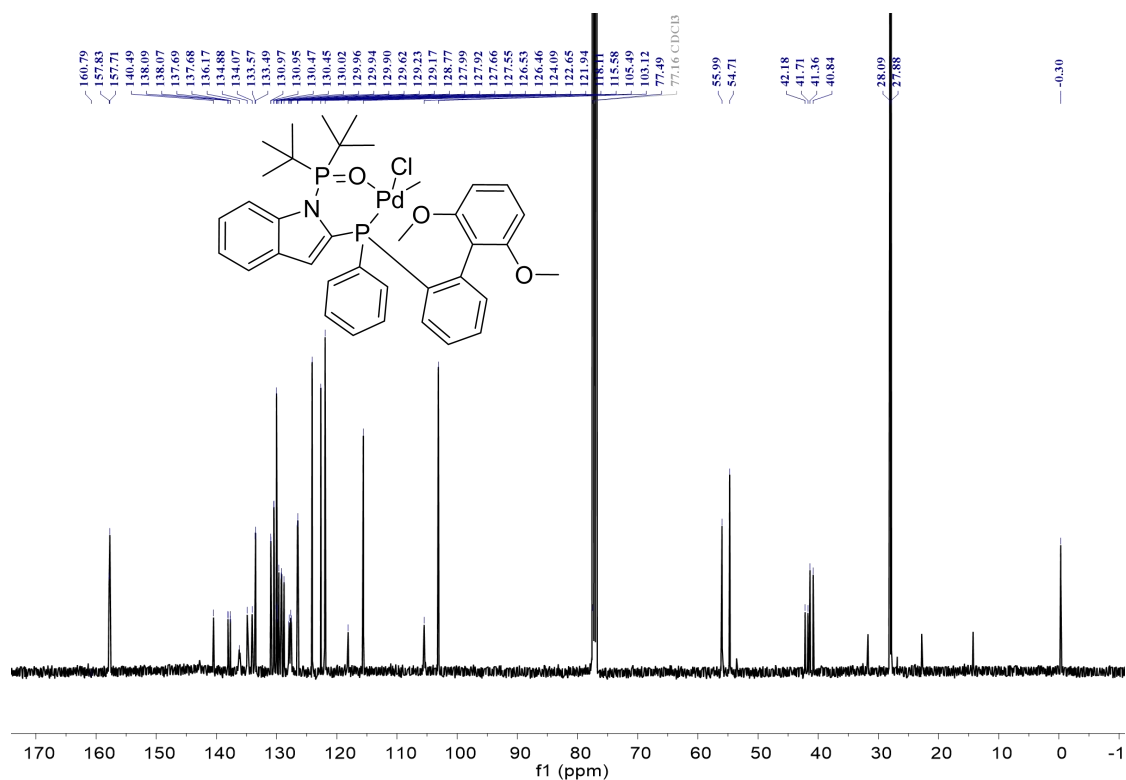

**Figure S17.** <sup>13</sup>C NMR (126 MHz, 298 K, CDCl<sub>3</sub>) of **2c**.

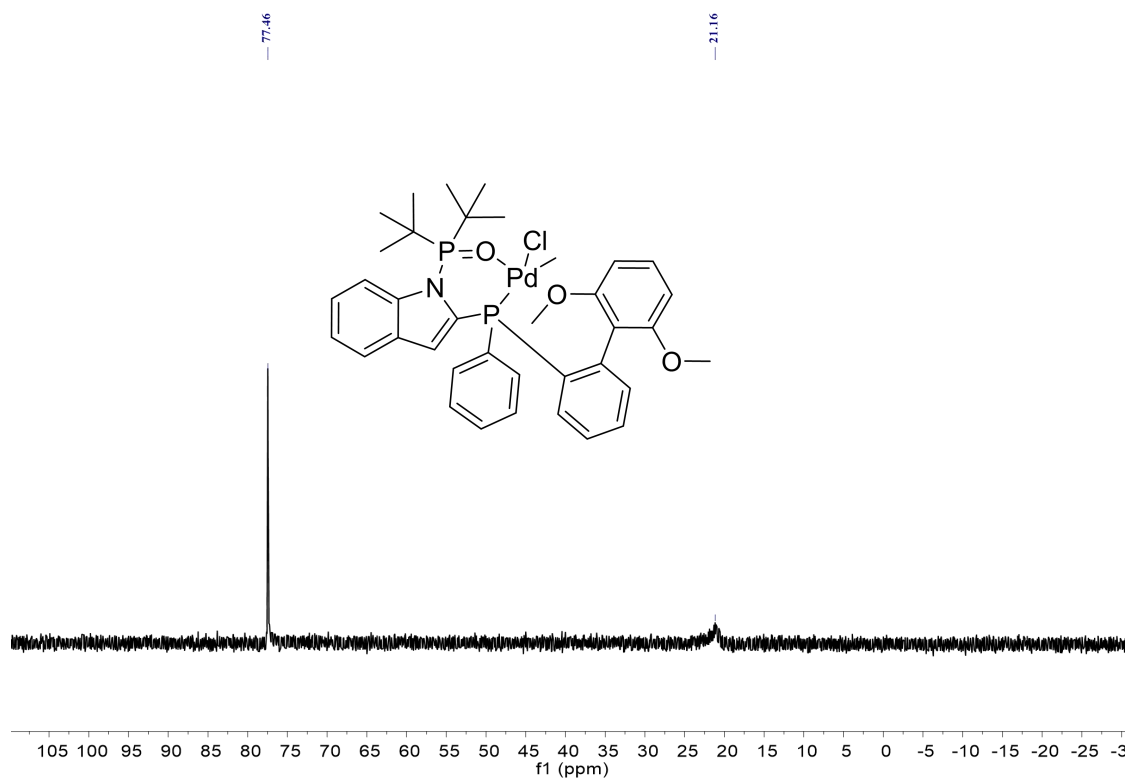

**Figure S18.** <sup>31</sup>P NMR spectrum (202 MHz, 298 K, CDCl<sub>3</sub>) of **2c**.

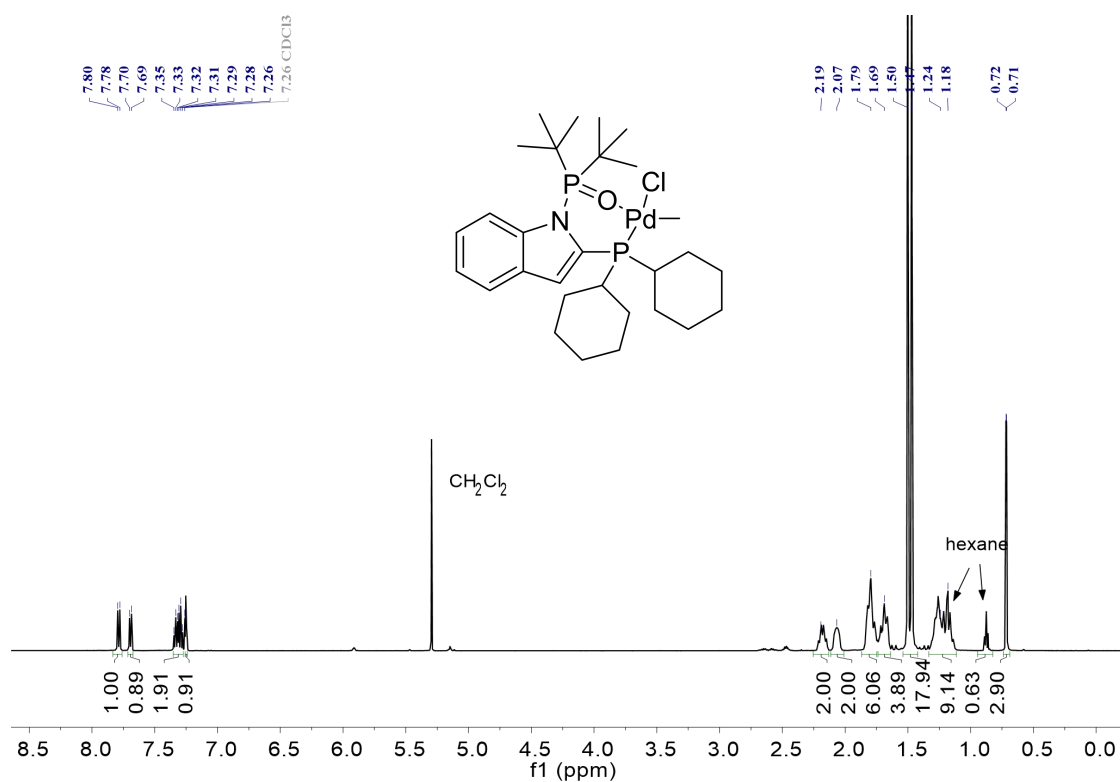

**Figure S19.** <sup>1</sup>H NMR (500 MHz, 298 K, CDCl<sub>3</sub>) of **2d**.

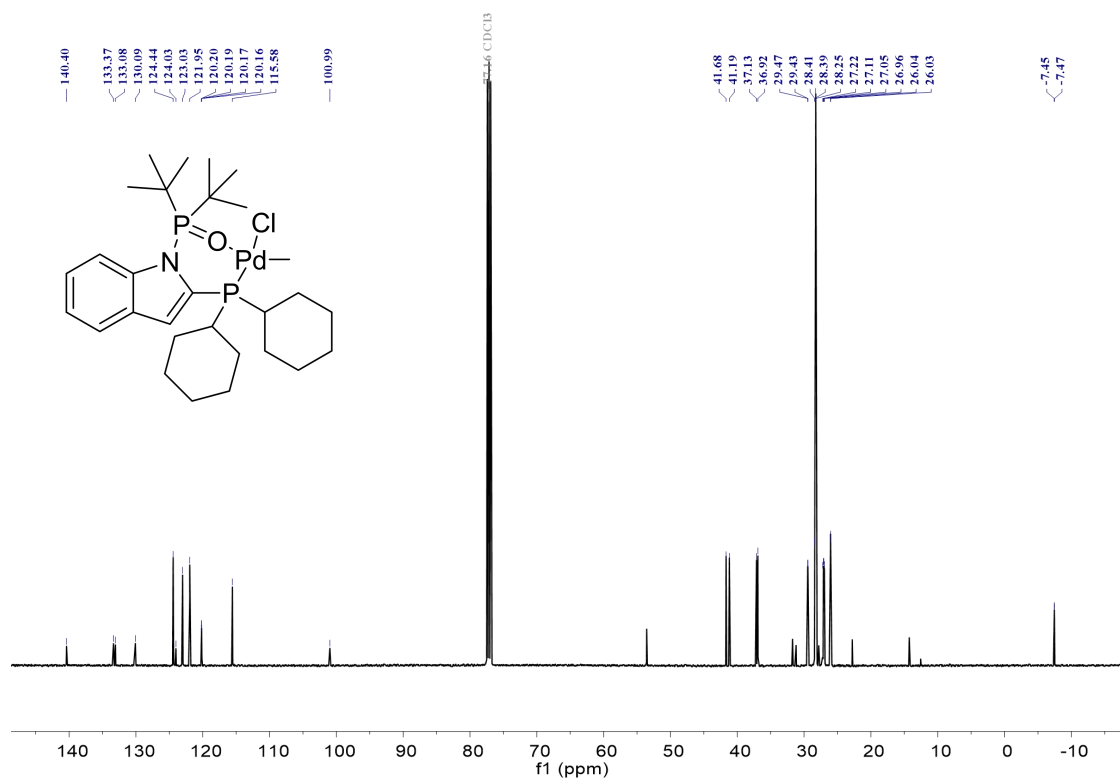

**Figure S20..** <sup>13</sup>C NMR (126 MHz, 298 K, CDCl<sub>3</sub>) of **2d**.

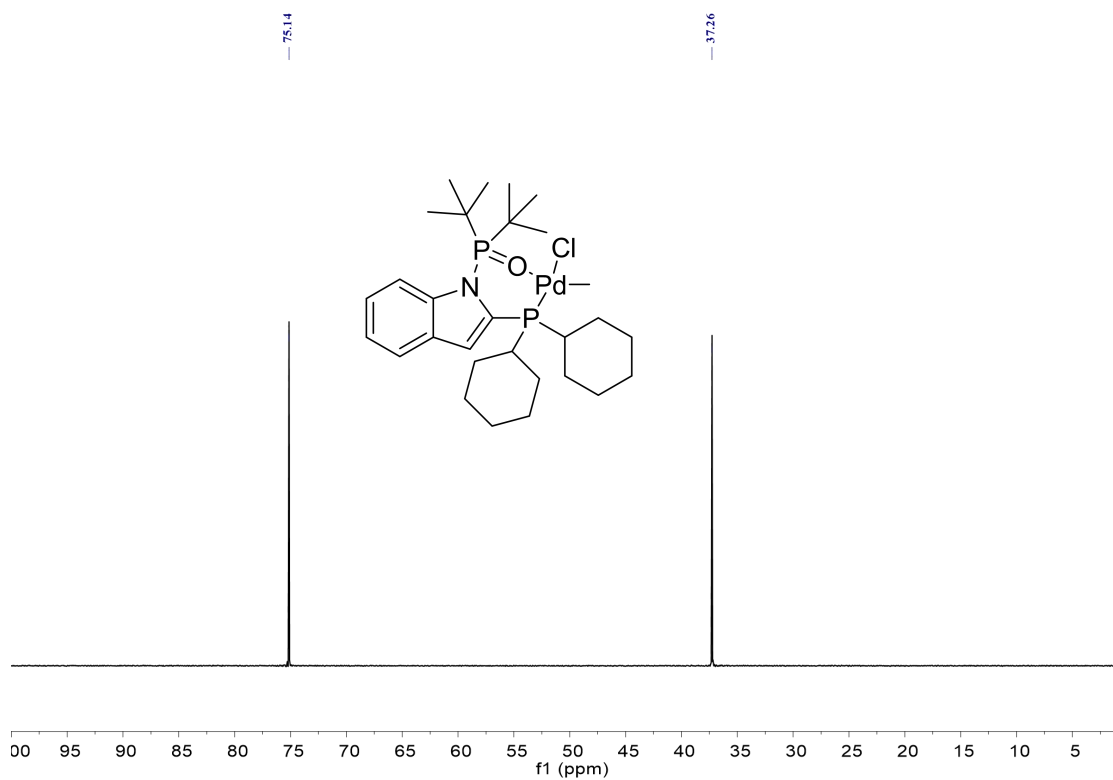

**Figure S21.**  $^{31}\text{P}$  NMR spectrum (202 MHz, 298 K,  $\text{CDCl}_3$ ) of **2d**.

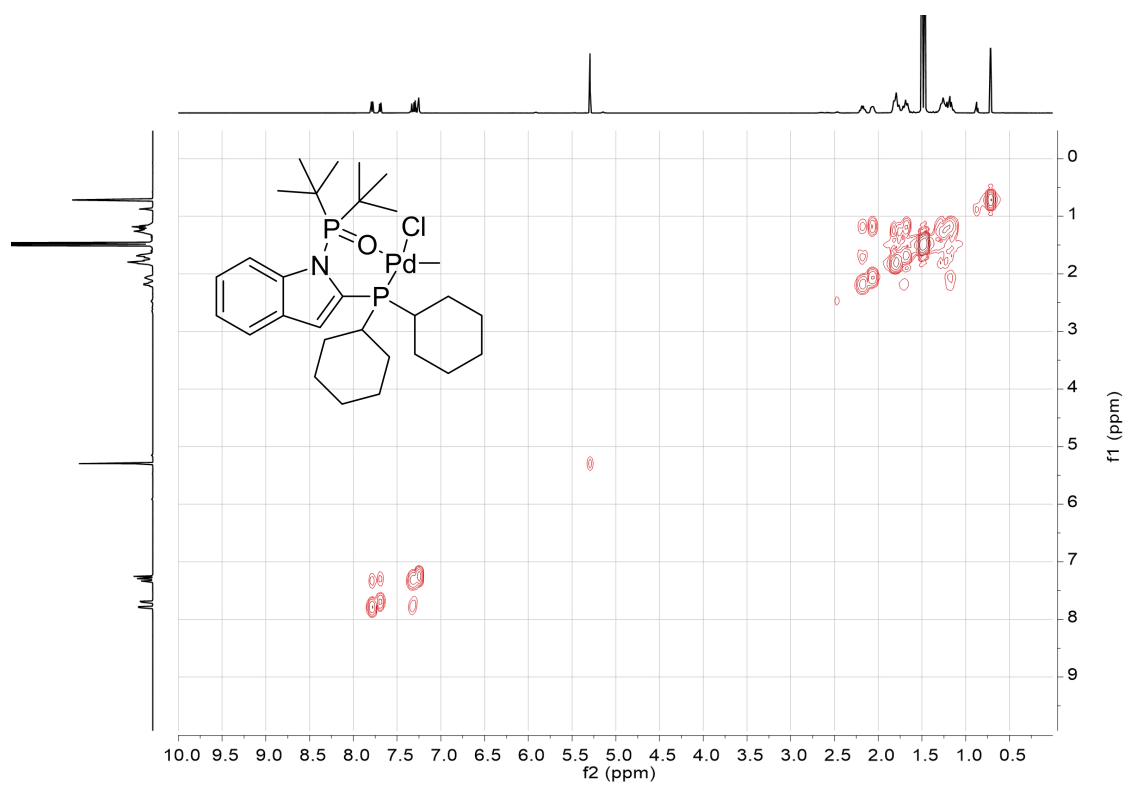

**Figure S22.**  $^1\text{H}$ - $^1\text{H}$  COSY spectrum (500 MHz, 298 K,  $\text{CDCl}_3$ ) of **2d**.

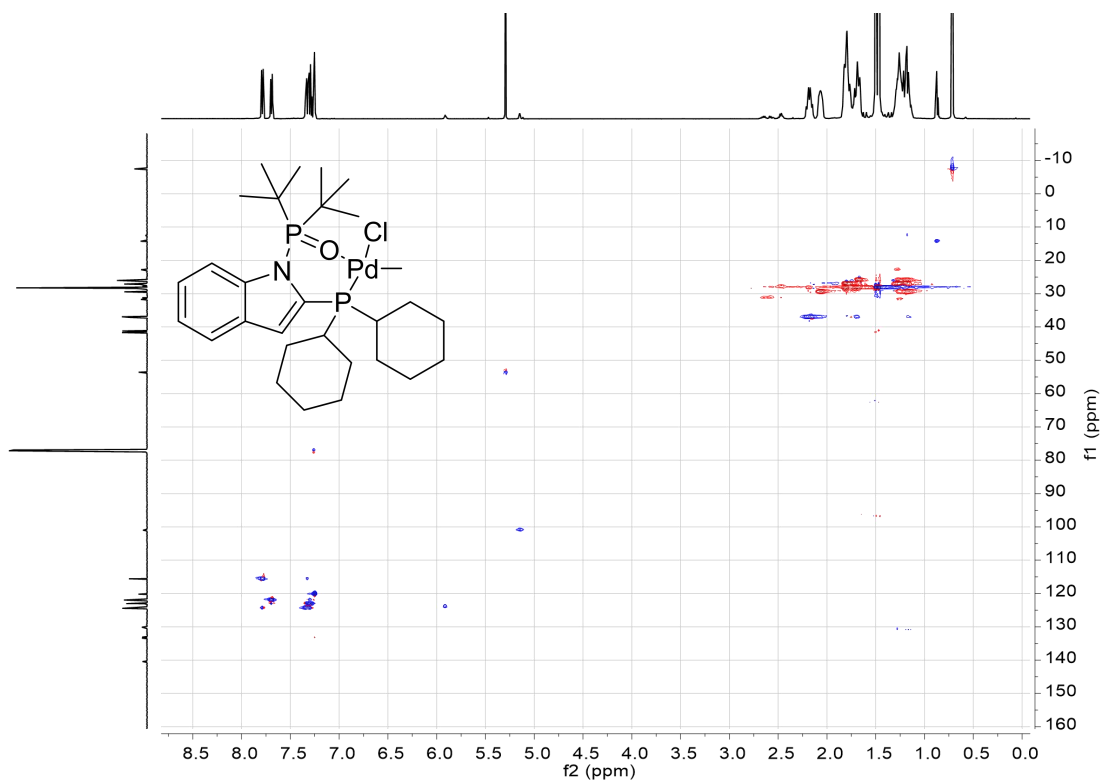

**Figure S23.**  $^1\text{H}$ - $^{13}\text{C}$  HSQC spectrum (500 MHz, 298 K,  $\text{CDCl}_3$ ) of **2d**.

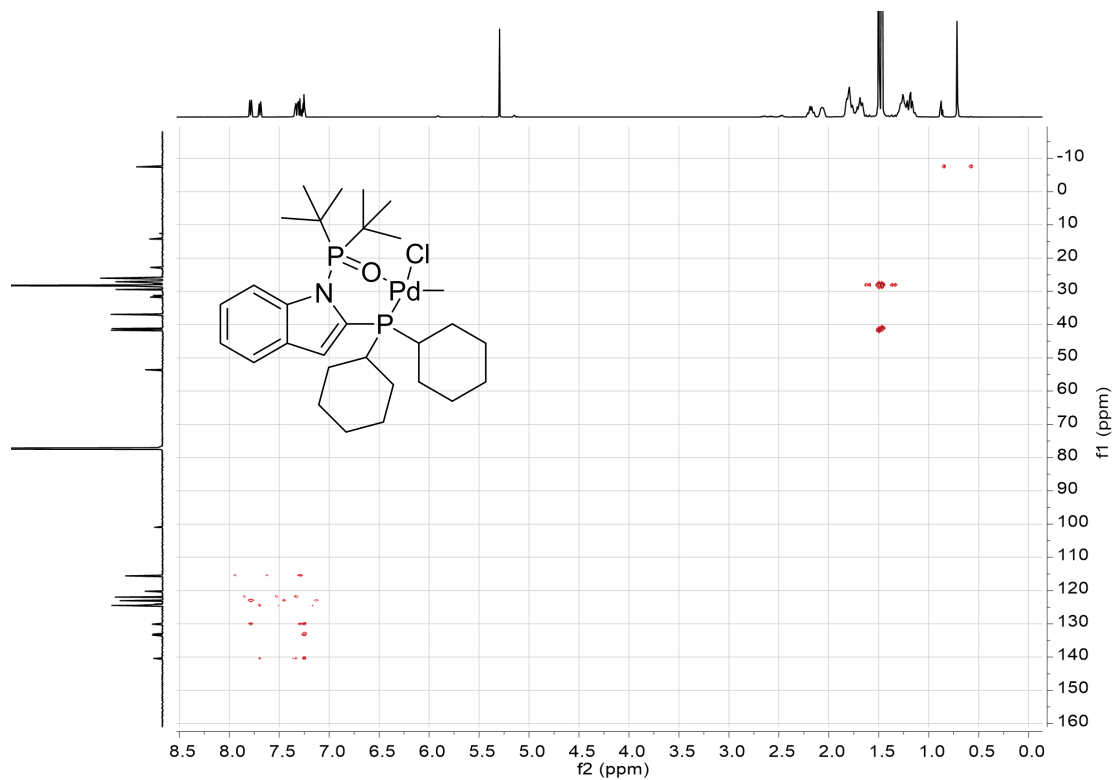

**Figure S24.**  $^1\text{H}$ - $^{13}\text{C}$  HMBC spectrum (500 MHz, 298 K,  $\text{CDCl}_3$ ) of **2d**.

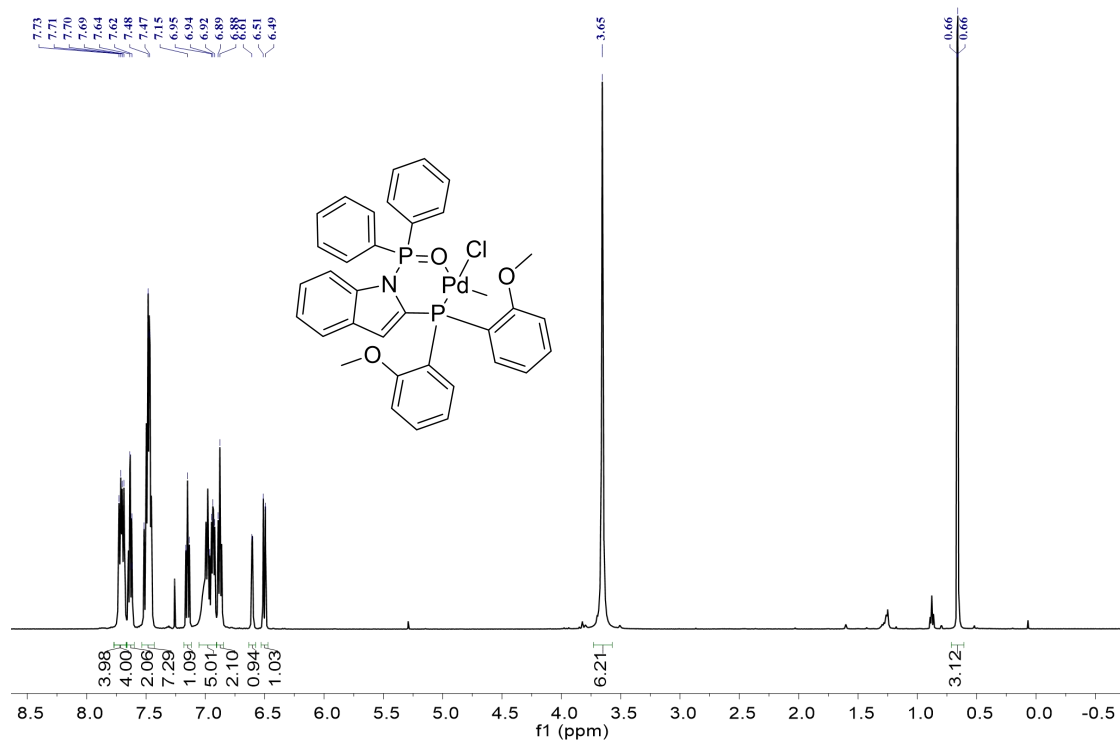

**Figure S25.** <sup>1</sup>H NMR (500 MHz, 298 K, CDCl<sub>3</sub>) of **2e**.

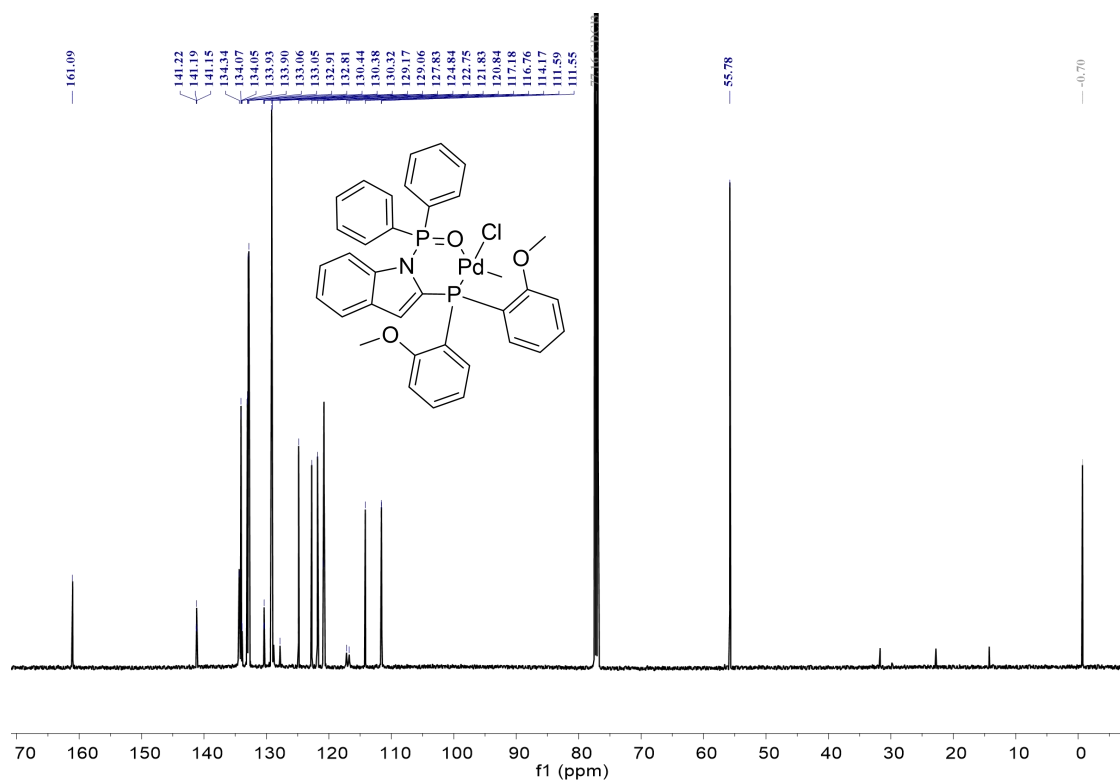

**Figure S26.** <sup>13</sup>C NMR (126 MHz, 298 K, CDCl<sub>3</sub>) of **2e**.



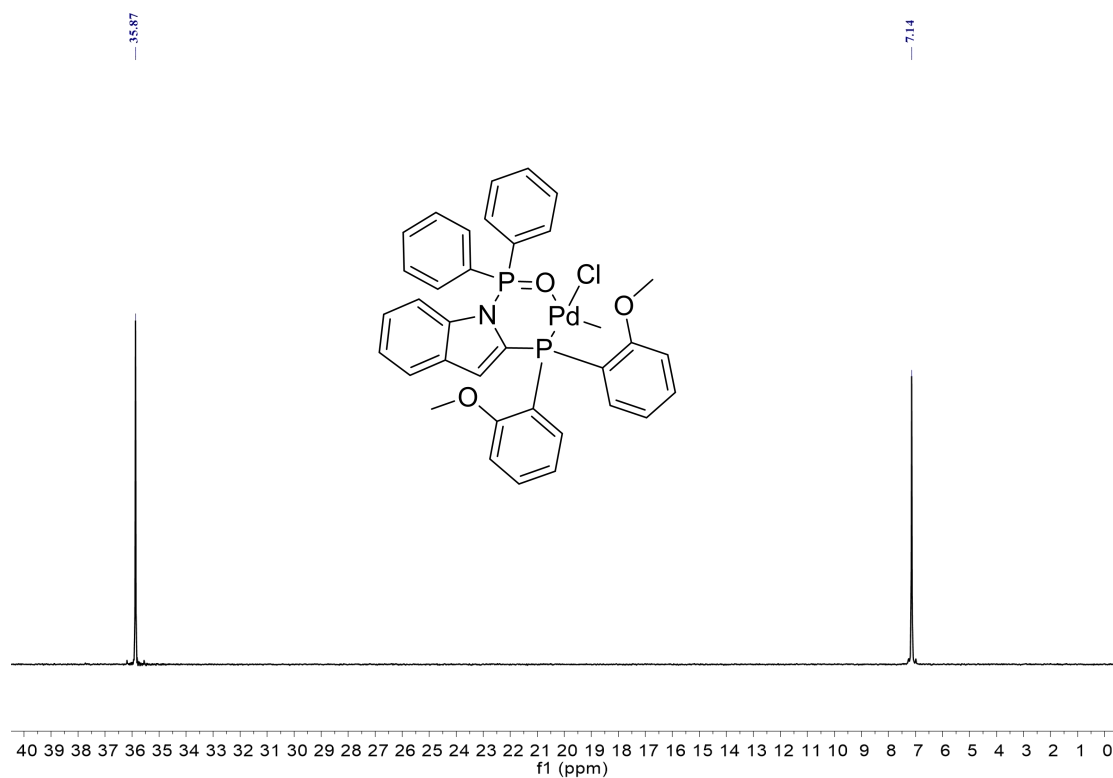

**Figure S27.** <sup>31</sup>P NMR spectrum (202 MHz, 298 K, CDCl<sub>3</sub>) of **2e**.

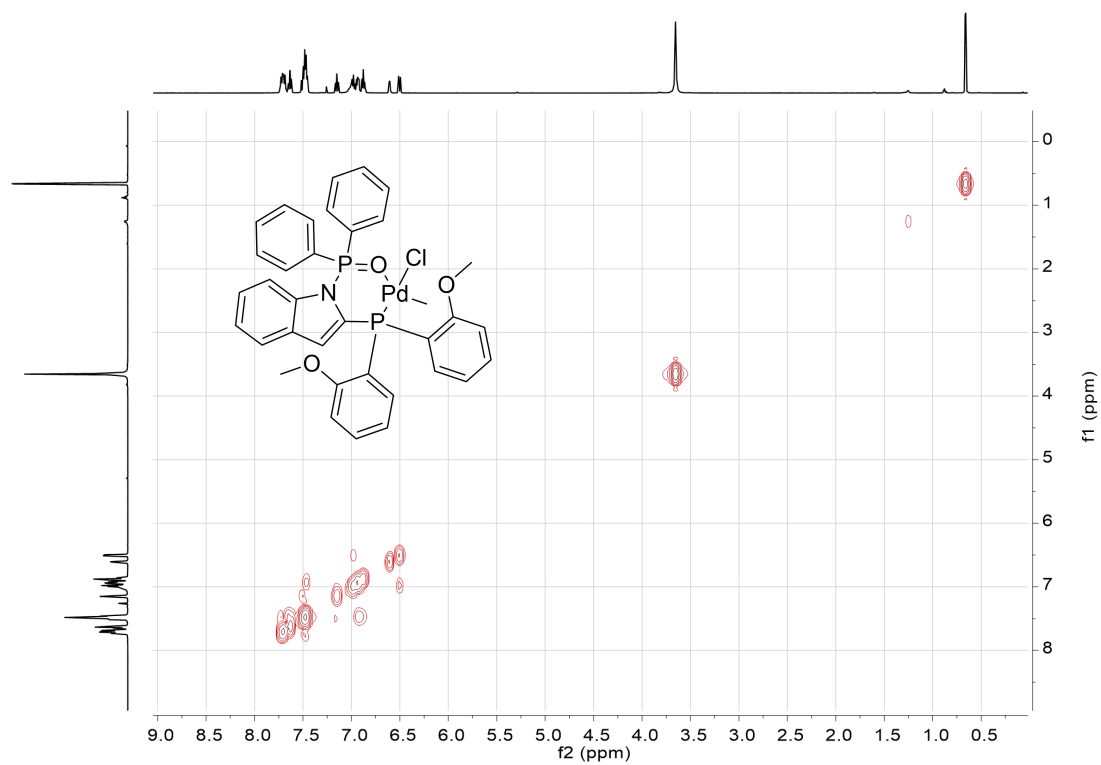

**Figure S28.** <sup>1</sup>H-<sup>1</sup>H COSY spectrum (500 MHz, 298 K, CDCl<sub>3</sub>) of **2e**.

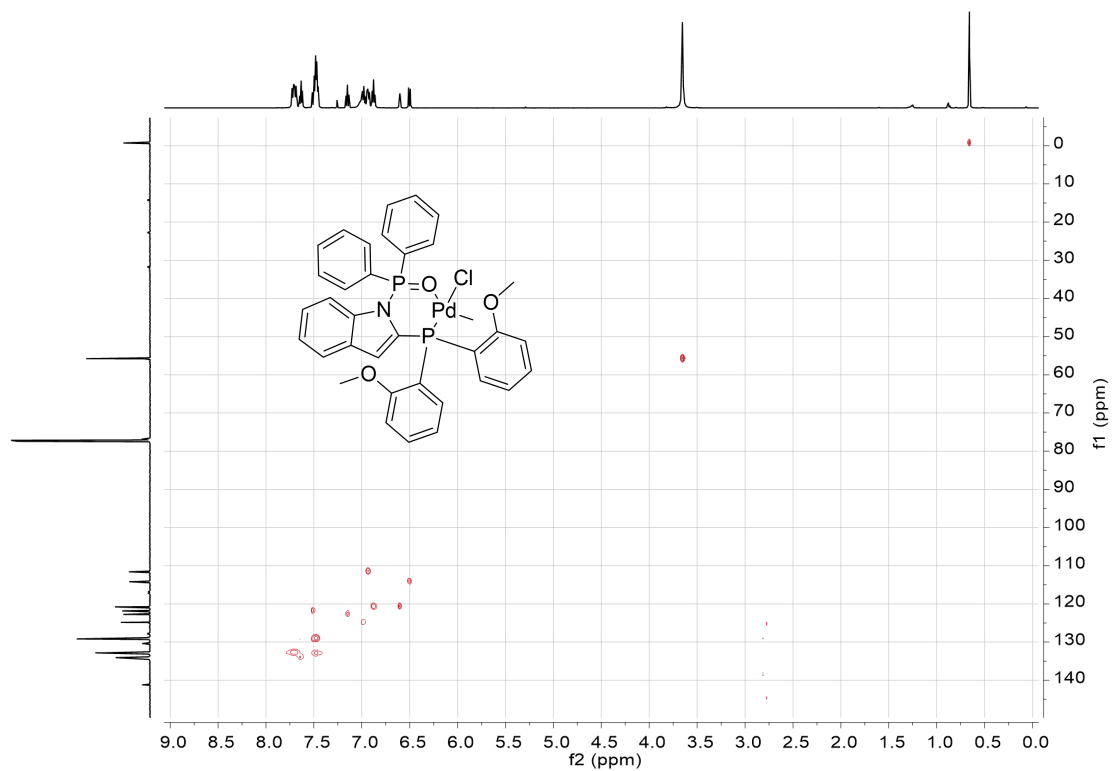

**Figure S29.**  $^1\text{H}$ - $^{13}\text{C}$  HSQC spectrum (500 MHz, 298 K,  $\text{CDCl}_3$ ) of **2e**.

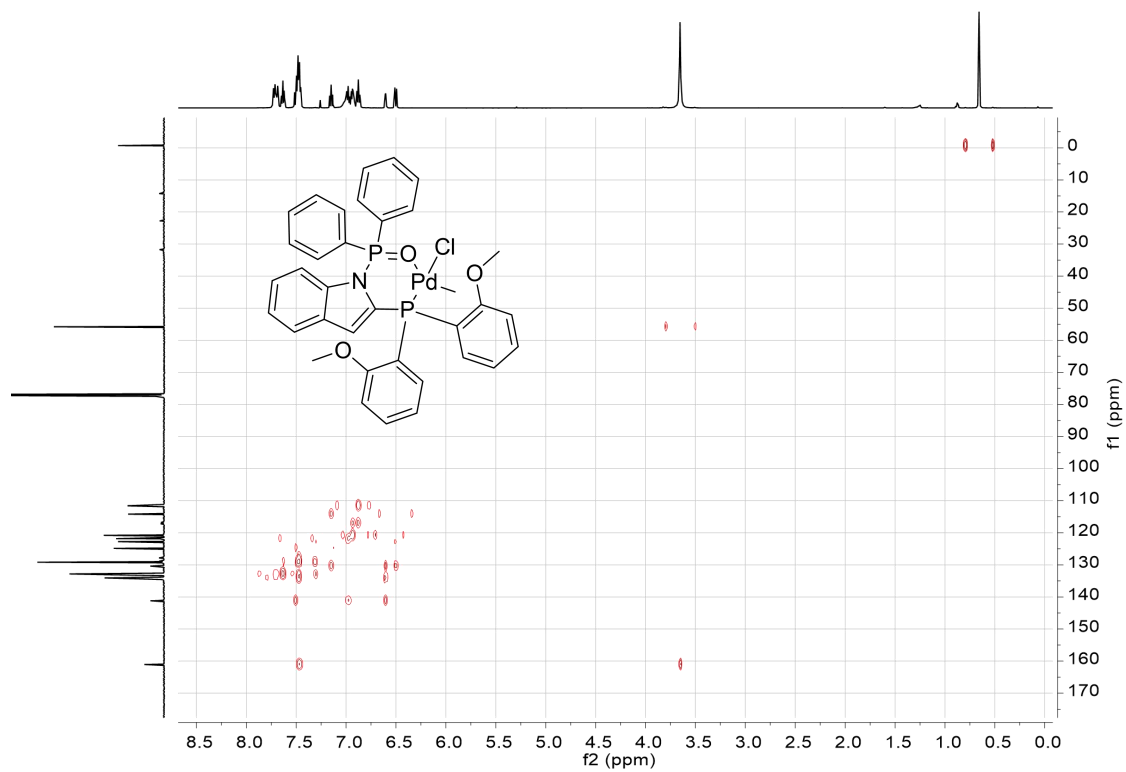

**Figure S30.**  $^1\text{H}$ - $^{13}\text{C}$  HMBC spectrum (500 MHz, 298 K,  $\text{CDCl}_3$ ) of **2e**.

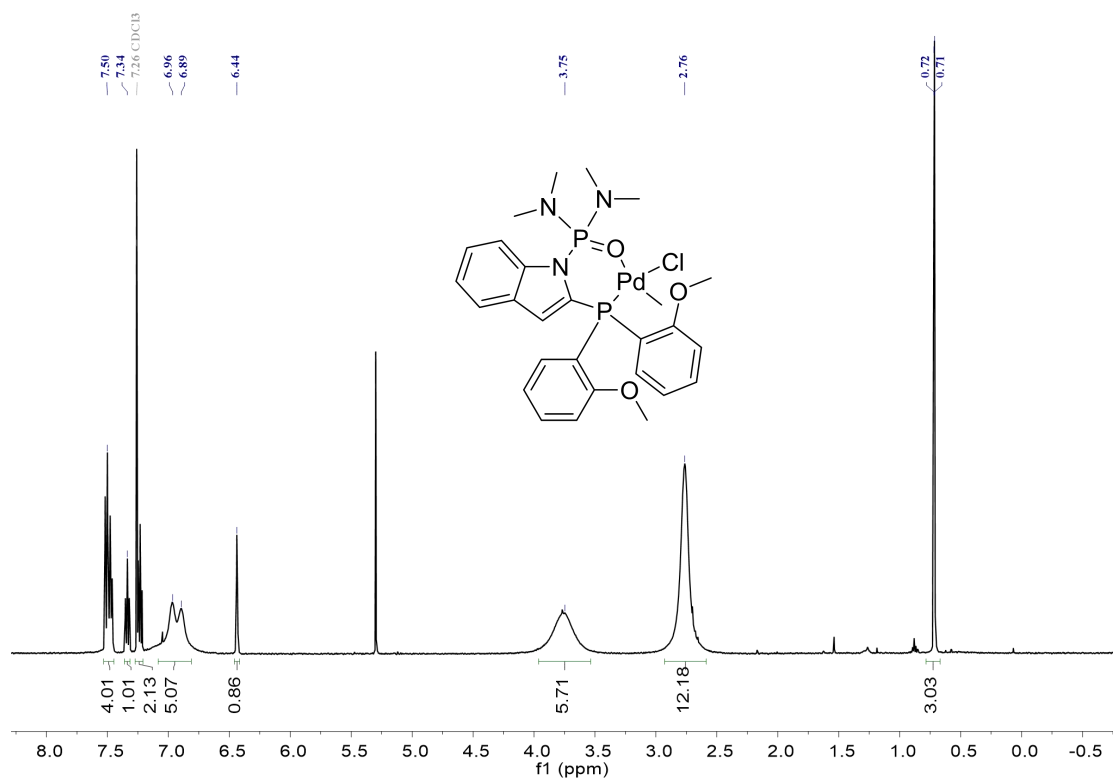

**Figure S31.** <sup>1</sup>H NMR (500 MHz, 298 K, CDCl<sub>3</sub>) of **2f**.

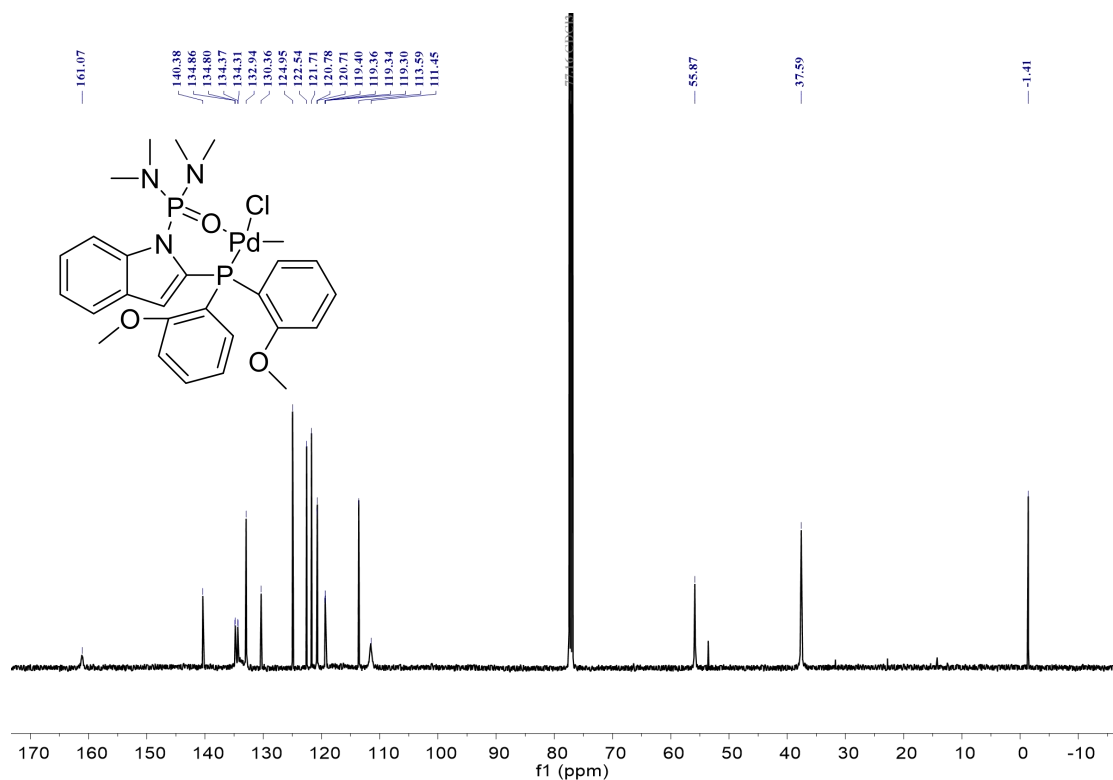

**Figure S32.** <sup>13</sup>C NMR (126 MHz, 298 K, CDCl<sub>3</sub>) of **2f**.

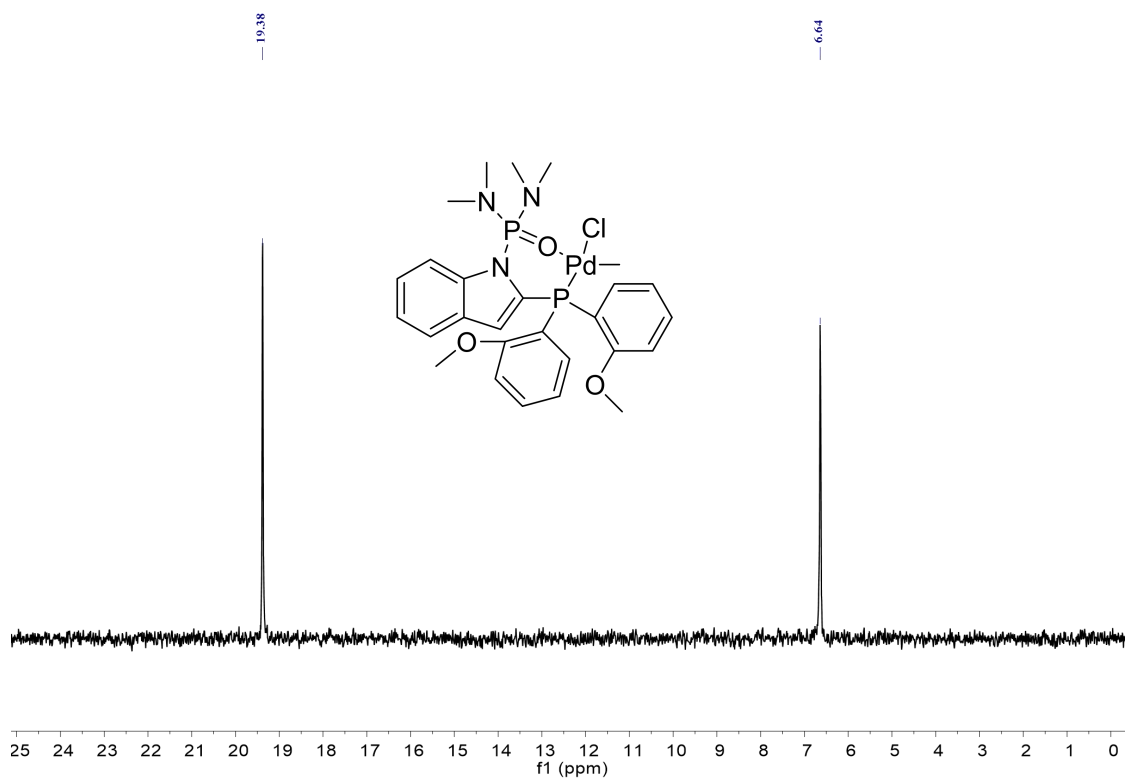

**Figure S33.**  $^{31}\text{P}$  NMR spectrum (202 MHz, 298 K,  $\text{CDCl}_3$ ) of **2f**.

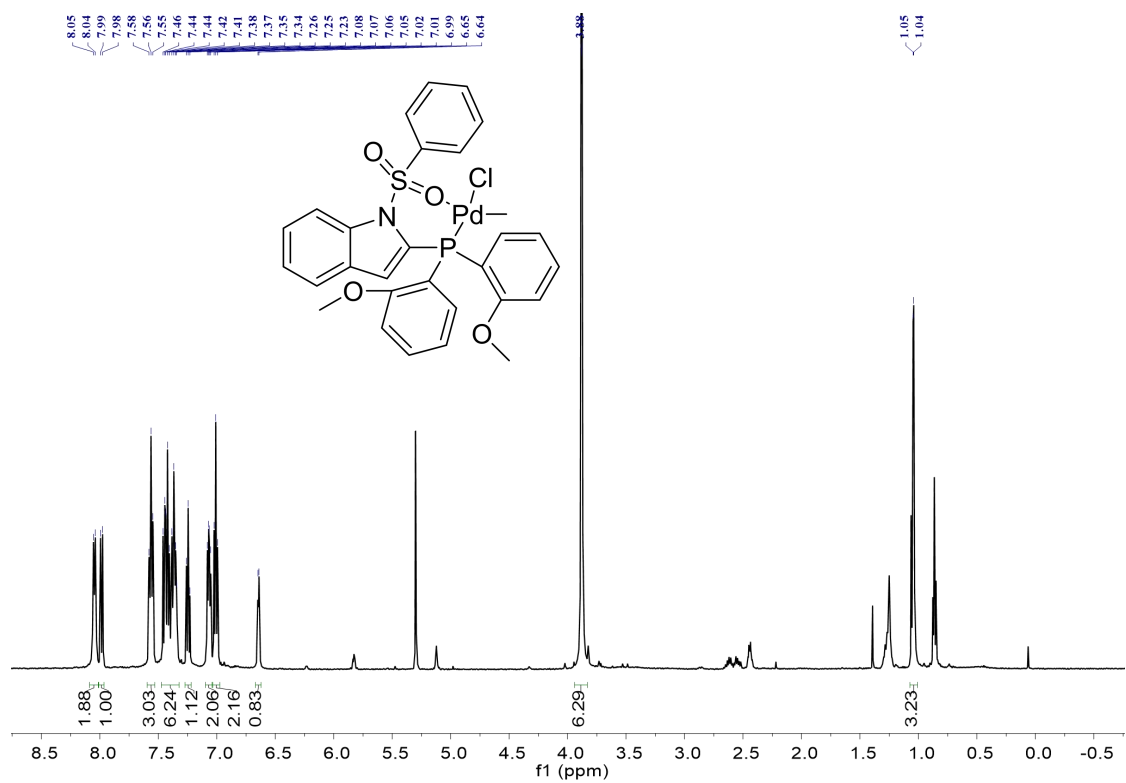

**Figure S34.**  $^1\text{H}$  NMR (500 MHz, 298 K,  $\text{CDCl}_3$ ) of **2g**.

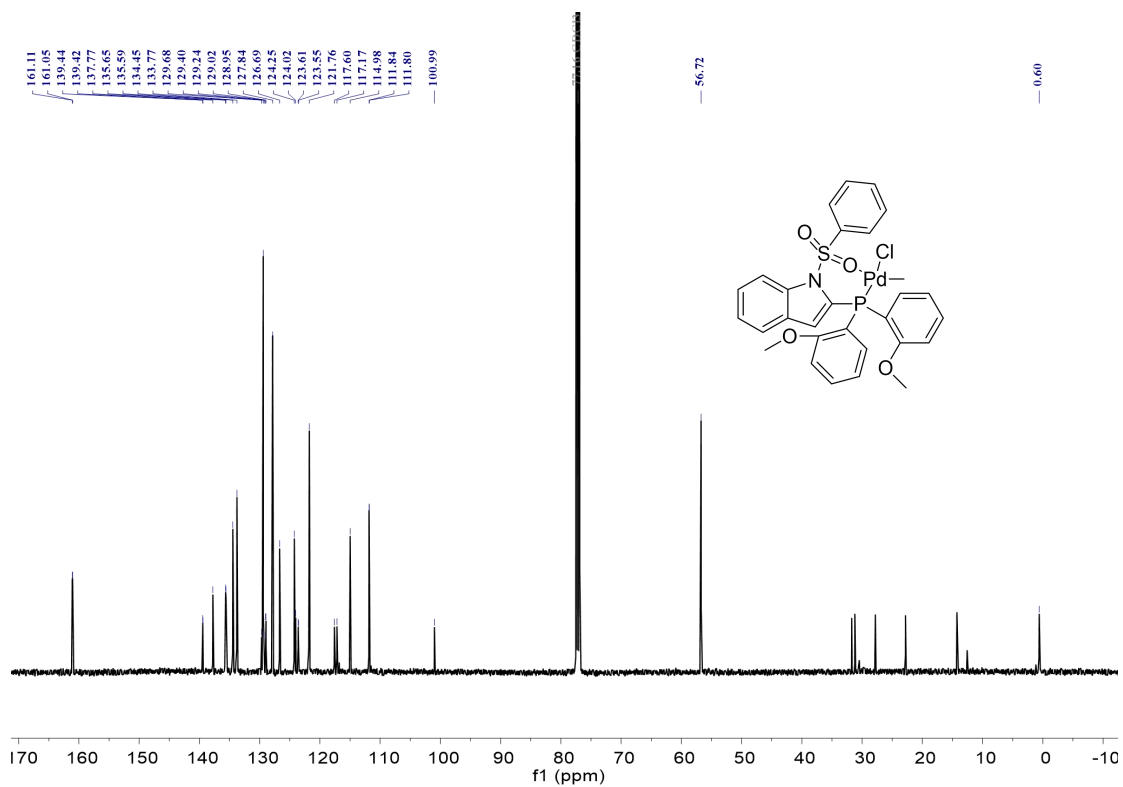

**Figure S35.** <sup>13</sup>C NMR (126 MHz, 298 K, CDCl<sub>3</sub>) of **2g**.

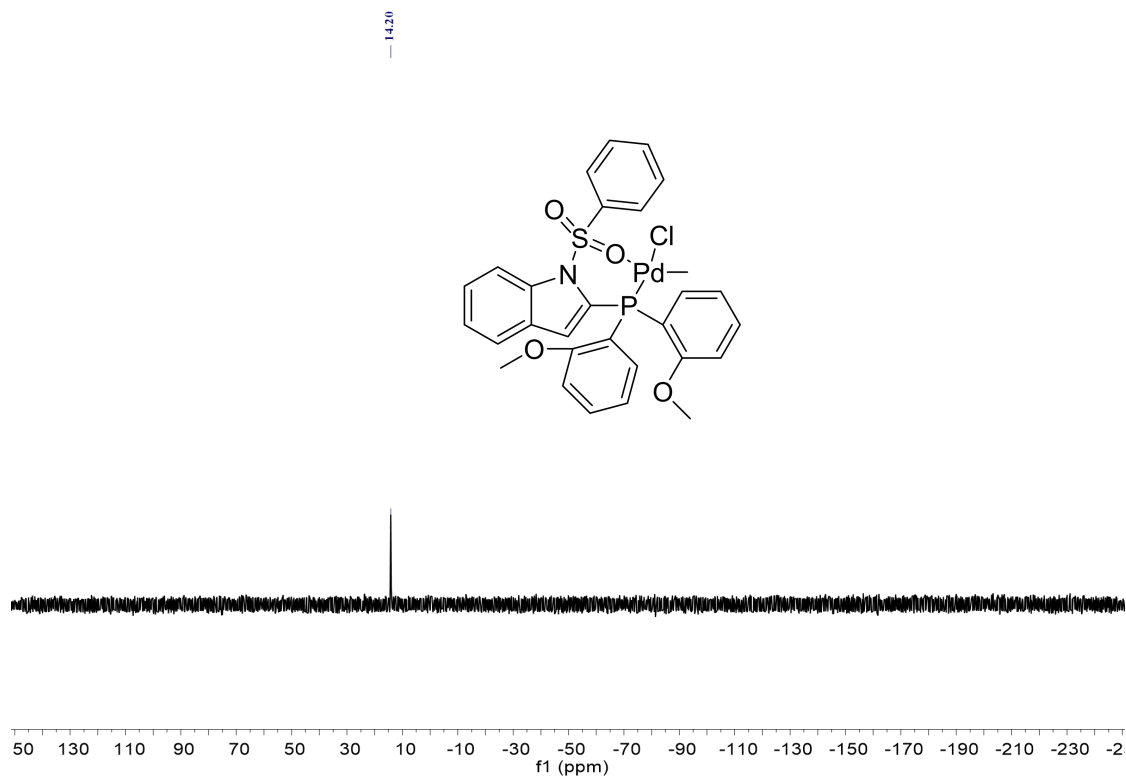

**Figure S36.** <sup>31</sup>P NMR spectrum (202 MHz, 298 K, CDCl<sub>3</sub>) of **2g**.

### 3. NMR spectra of (co)polymers

#### Calculation of Me Branches/ 1000C

$$\text{Me Branches (doublet)/ 1000C} = \frac{(I_1 - \frac{I_4 + I_5}{2} \times 3) / 3}{(I_1 + I_2 + I_3 + I_4 + I_5) / 2} \times 1000$$

I<sub>1</sub>: overall integral of Me groups

I<sub>2</sub>: Integral of main-chain CH<sub>2</sub> signals

I<sub>3</sub>: Integral of allylic group

I<sub>4</sub>: Integral of CH<sub>2</sub> signals of chain-end double bonds

I<sub>5</sub>: Integral of CH signals of inner double bonds

**Figure S40 as an example**

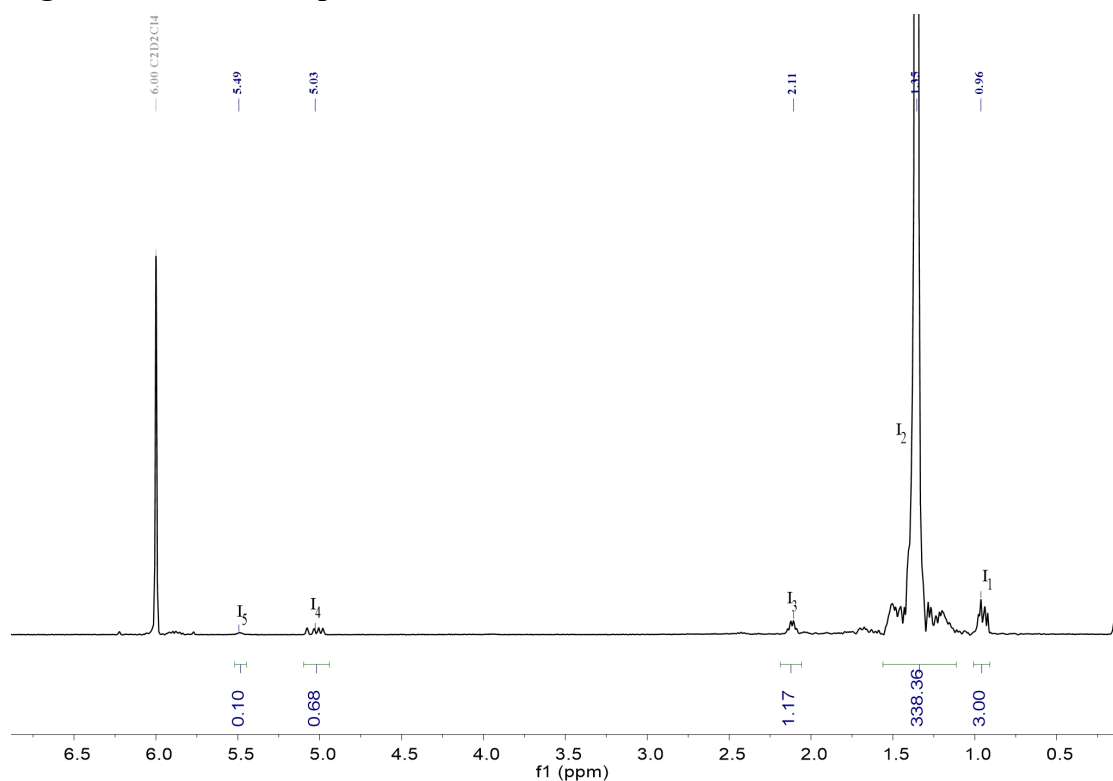

$$\text{Me Branches/ 1000C} = \frac{\left( 3.0 - 3 \times \frac{0.68 + 0.10}{2} \right) / 3}{(3.0 + 338.36 + 1.17 + 0.68) / 2} \times 1000 = 3.6$$

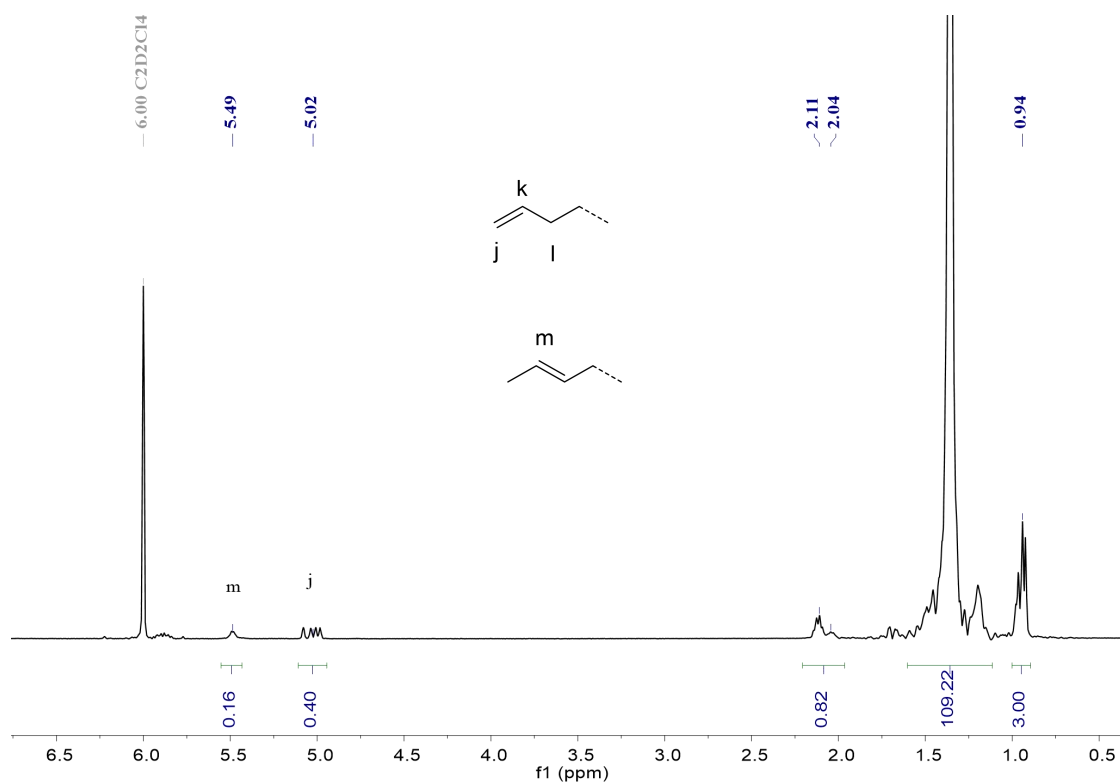

**Figure S37.**  $^1\text{H}$  NMR spectrum (400 MHz,  $\text{C}_2\text{D}_2\text{Cl}_4$ , 110  $^\circ\text{C}$ ) of the polymer from table 1, entry 2.

$$\text{Me Branches/ 1000C} = \frac{\left(3.0 - 3 \times \frac{0.40 + 0.16}{2}\right) / 3}{(3.0 + 109.22 + 0.82 + 0.40 + 0.16) / 2} \times 1000 = 12.7$$

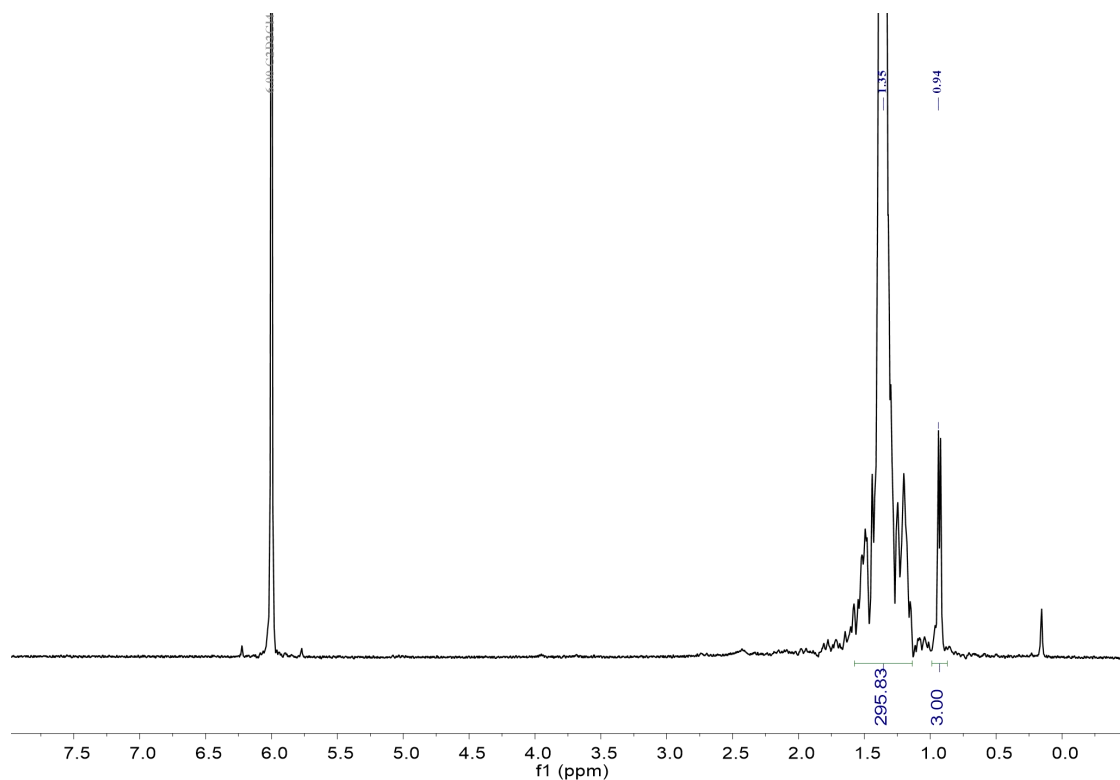

**Figure S38.**  $^1\text{H}$  NMR spectrum (400 MHz,  $\text{C}_2\text{D}_2\text{Cl}_4$ , 110  $^\circ\text{C}$ ) of the polymer from table 1, entry 4.

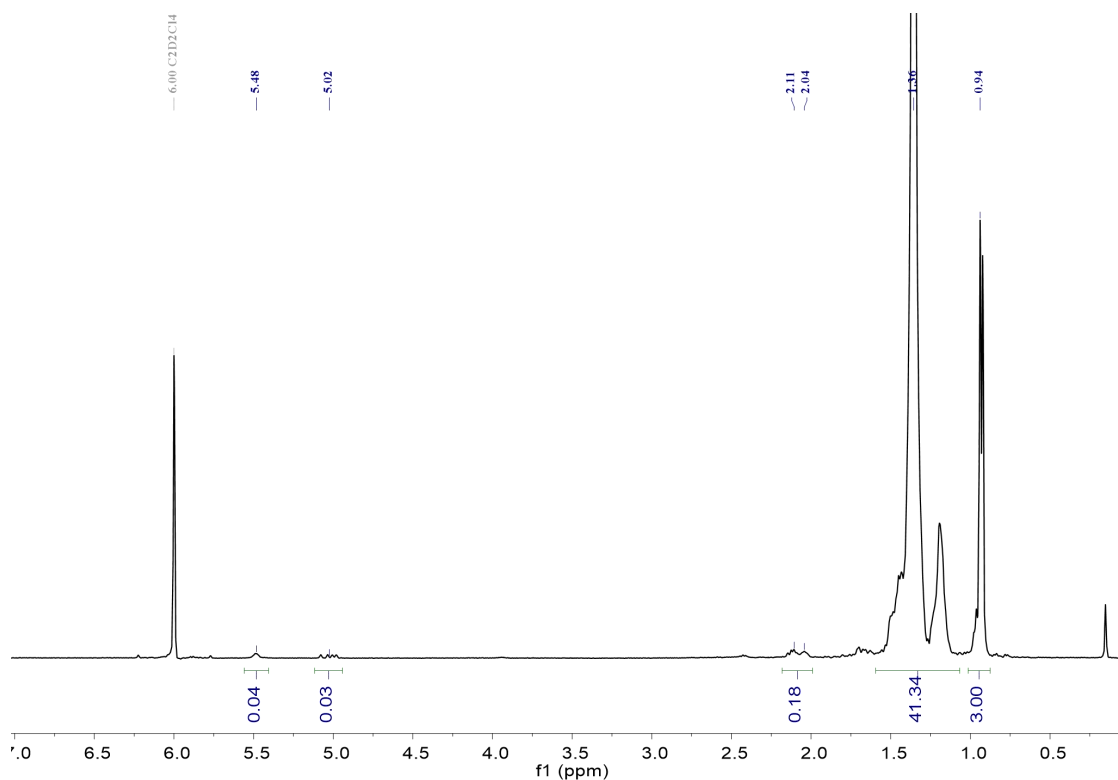

**Figure S39.**  $^1\text{H}$  NMR spectrum (400 MHz,  $\text{C}_2\text{D}_2\text{Cl}_4$ , 110  $^\circ\text{C}$ ) of the polymer from table 1, entry 8.

$$\text{Me Branches/ 1000C} = \frac{\left(3.0 - 3 \times \frac{0.03+0.04}{2}\right) / 3}{(3.0+41.34+0.18+0.21+0.03+0.04)/2} \times 1000 = 41.9$$

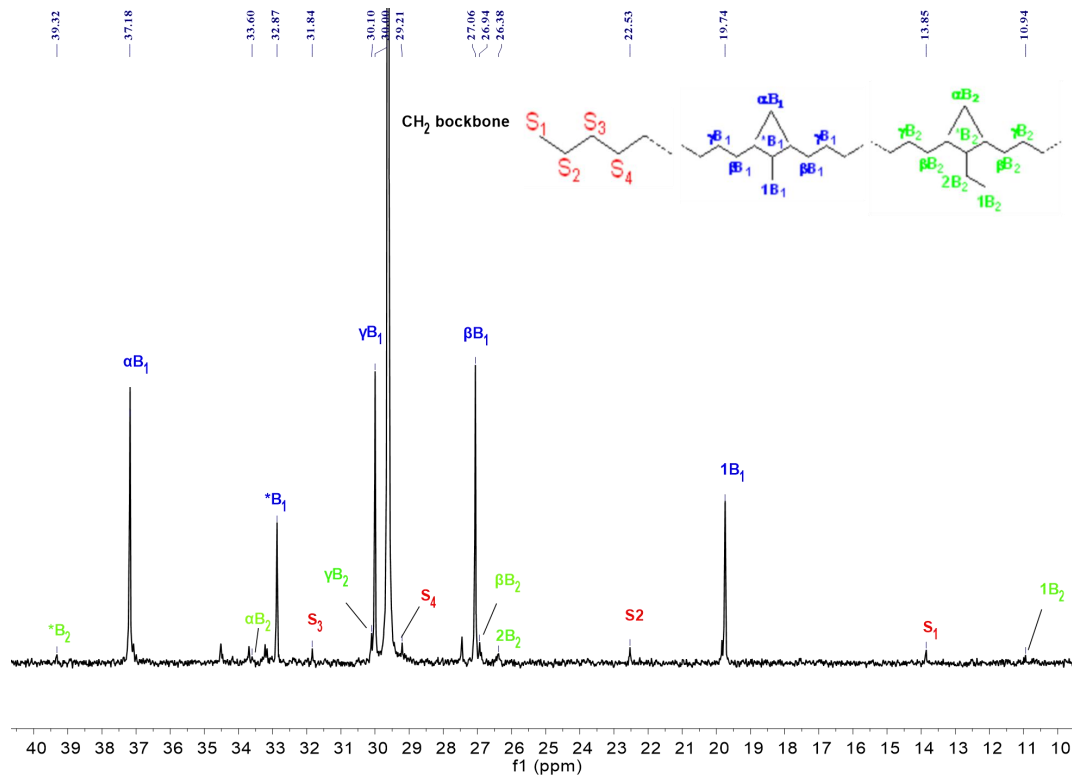

**Figure S40.**  $^{13}\text{C}$  NMR spectrum (101 MHz,  $\text{C}_2\text{D}_2\text{Cl}_4$ , 110  $^\circ\text{C}$ ) of the polymer from table 1, entry 8.



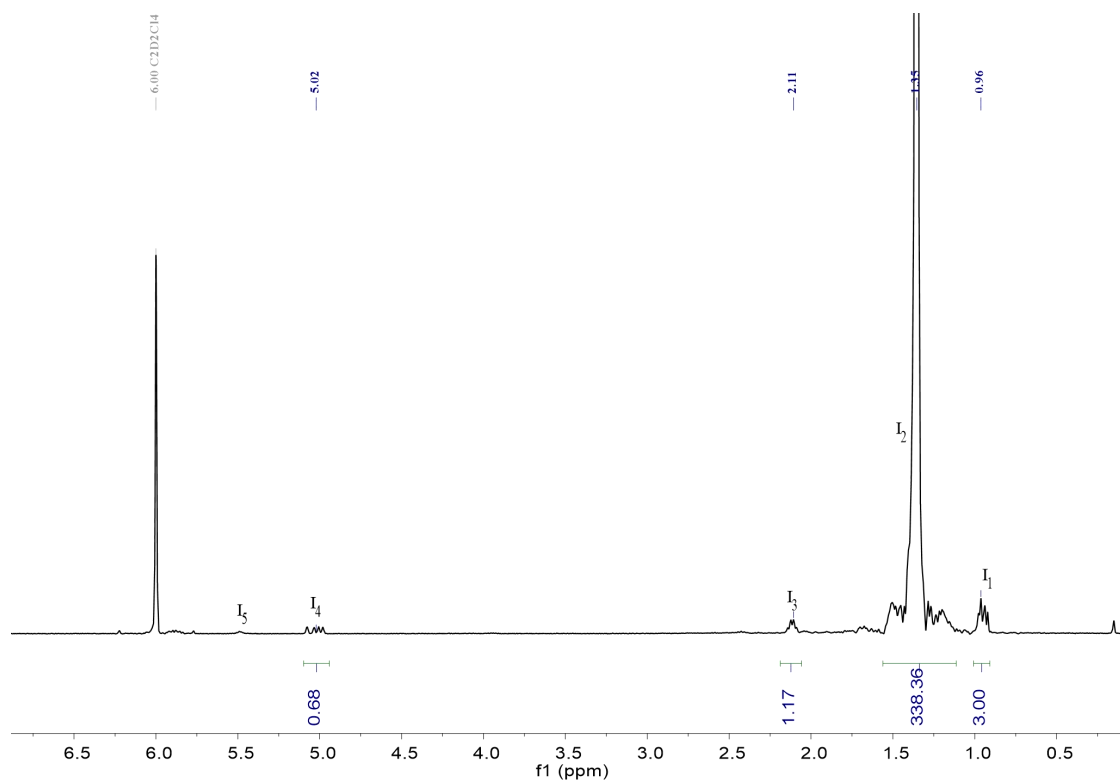

**Figure S41.**  $^1H$  NMR spectrum (400 MHz,  $C_2D_2Cl_4$ , 110 °C) of the polymer from table 1, entry 10.

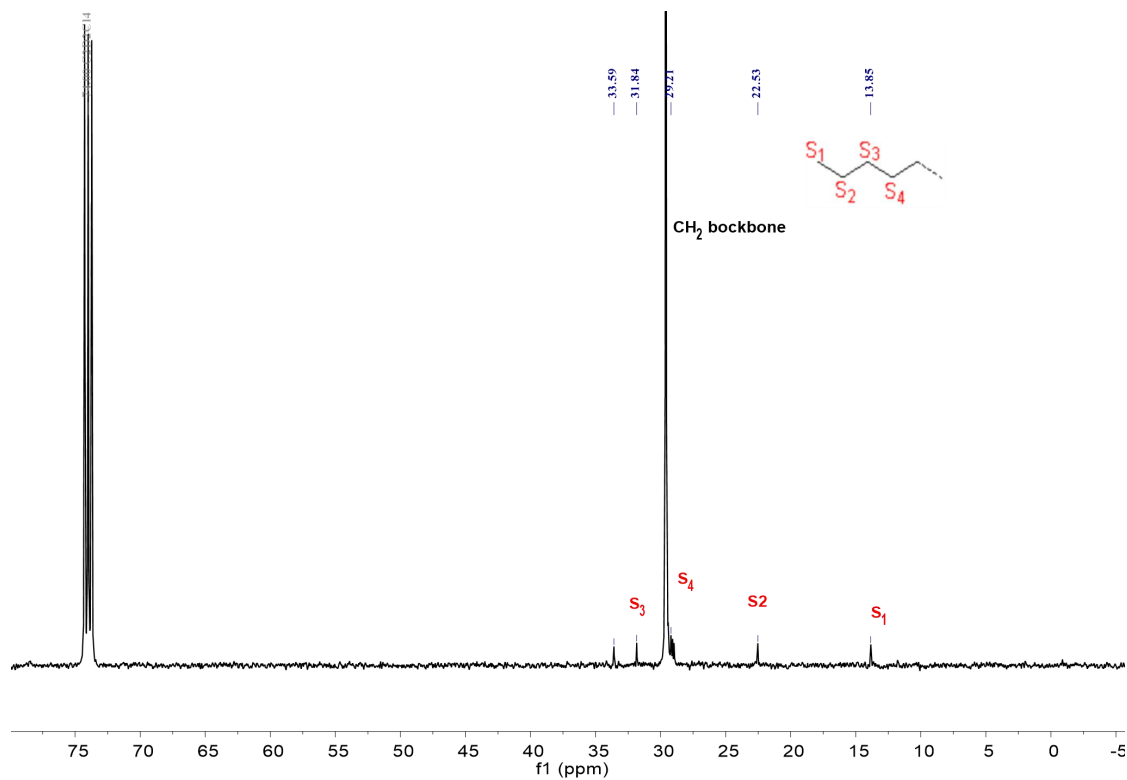

**Figure S42.**  $^{13}C$  NMR spectrum (101 MHz,  $C_2D_2Cl_4$ , 110 °C) of the polymer from table 1, entry 12.

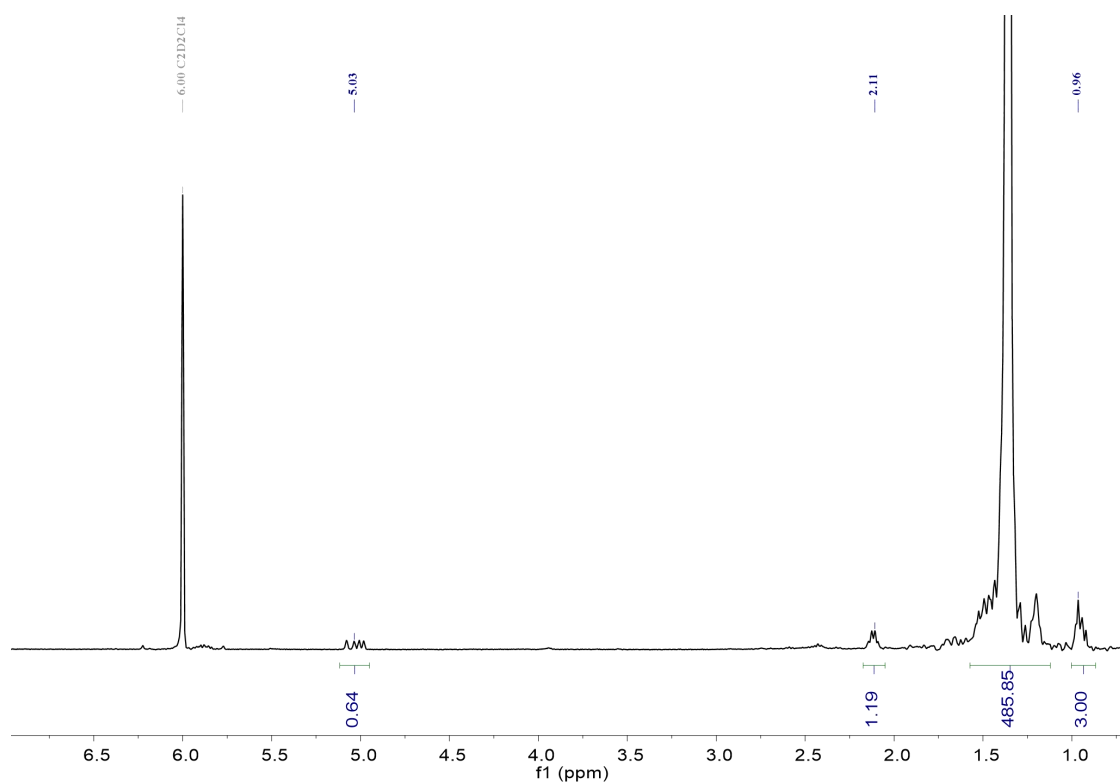

**Figure S43.**  $^1\text{H}$  NMR spectrum (400 MHz,  $\text{C}_2\text{D}_2\text{Cl}_4$ , 110  $^\circ\text{C}$ ) of the polymer from table 1, entry 14.

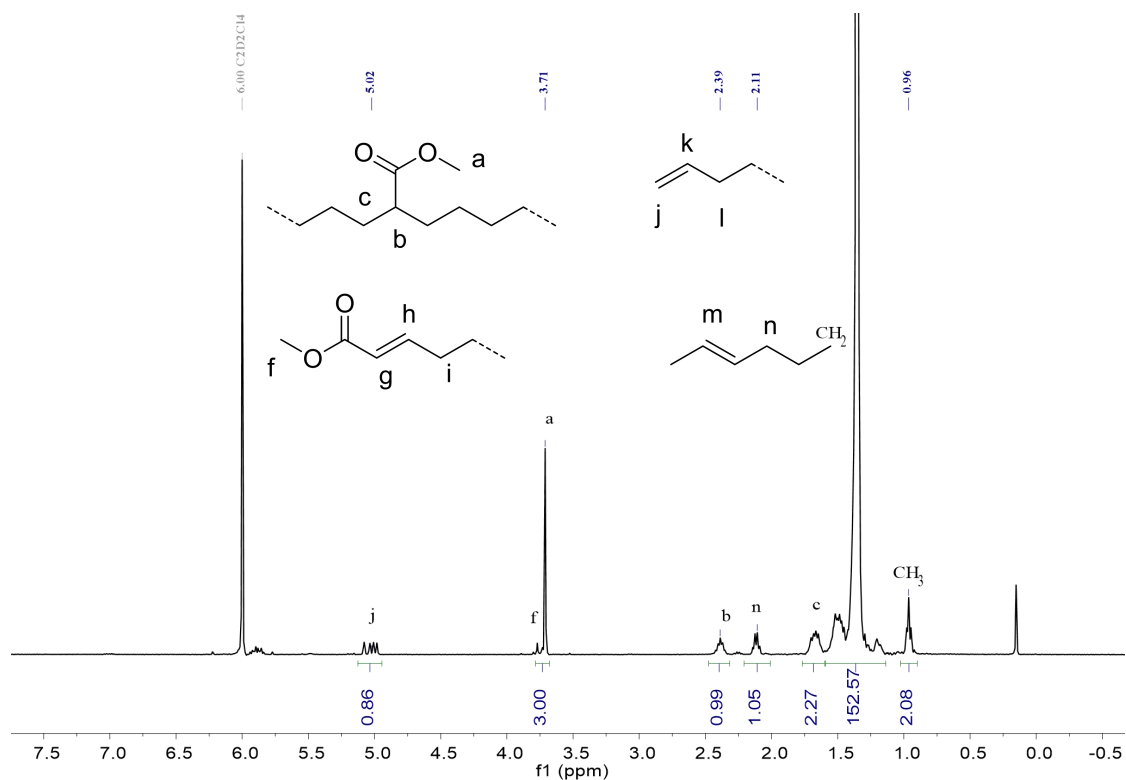

**Figure S44.** <sup>1</sup>H NMR spectrum (400 MHz, C<sub>2</sub>D<sub>2</sub>Cl<sub>4</sub>, 100 °C) of the E-MA copolymer from table 2, entry 2. (Signal assignments: JACS. 2009, 131, 422)

$$\text{MA (\%)} = \frac{(a+f)/3}{\frac{(CH_3+CH_2)}{4} + \frac{(a+f)}{3}} \times 100\% = \frac{3/3}{\frac{152.57+2.08}{4} + \frac{3}{3}} \times 100\% = 2.5 \%$$

$$\text{Me Branches/ 1000C} = \frac{(I_{CH_3} - \frac{j}{2} \times 3) / 3}{\frac{CH_3}{3} + \frac{CH_2+n+c+j}{2} + \frac{a+f}{3}} \times 1000 = \frac{(2.08 - \frac{0.86}{2} \times 3) / 3}{\frac{2.08+3}{3} + \frac{152.57+2.27+1.05+0.86}{2}} = 3.3$$

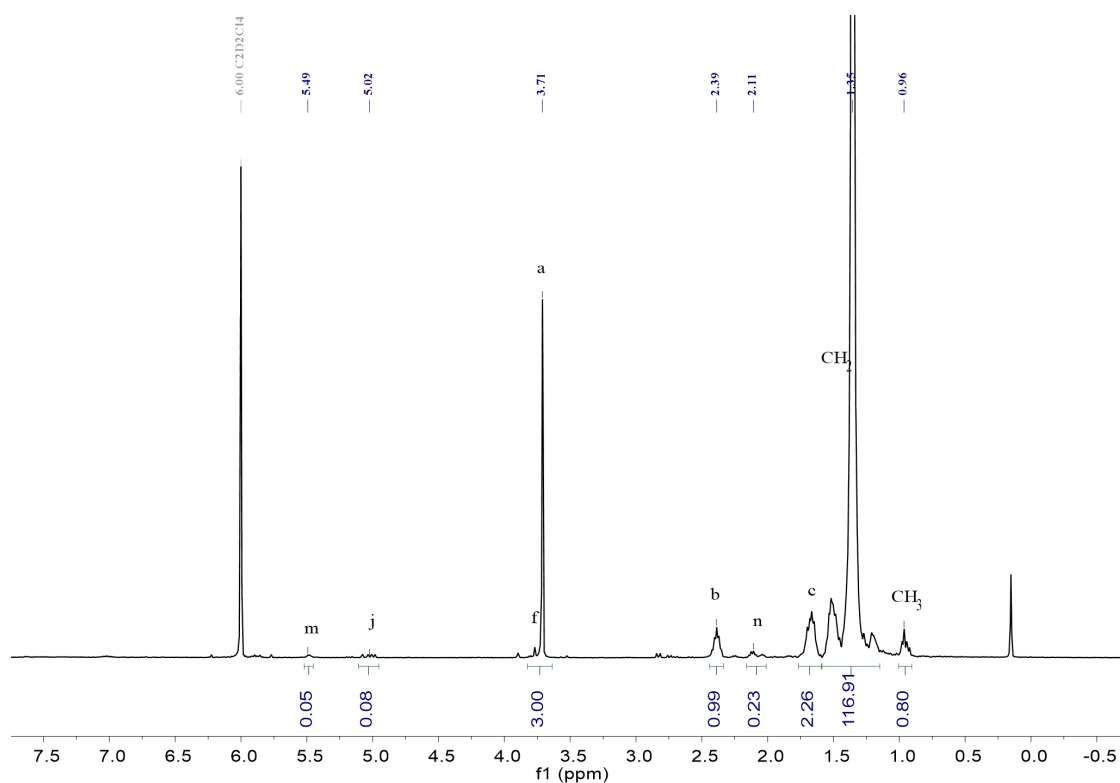

**Figure S45.**  $^1\text{H}$  NMR spectrum (400 MHz,  $\text{C}_2\text{D}_2\text{Cl}_4$ , 100  $^\circ\text{C}$ ) of the E-MA copolymer from table 2, entry 3. (Signal assignments: JACS. 2009, 131, 422)

$$\text{MA (\%)} = \frac{(a+f)/3}{\frac{(CH_3+CH_2)}{4} + \frac{(a+f)}{3}} \times 100\% = \frac{3/3}{\frac{116.91+0.80}{4} + \frac{3}{3}} \times 100\% = 3.3 \%$$

$$\text{Me Branches/ 1000C} = \frac{(I_{CH_3} - \frac{j+m}{2} \times 3)/3}{\frac{CH_3}{3} + \frac{CH_2+n+c+j}{2} + \frac{a+f}{3}} \times 1000 = \frac{(0.80 - \frac{0.08+0.05}{2} \times 3)/3 \times 1000}{\frac{0.80+3}{3} + \frac{116.91+2.26+0.23+0.08}{2}} = 3.3$$

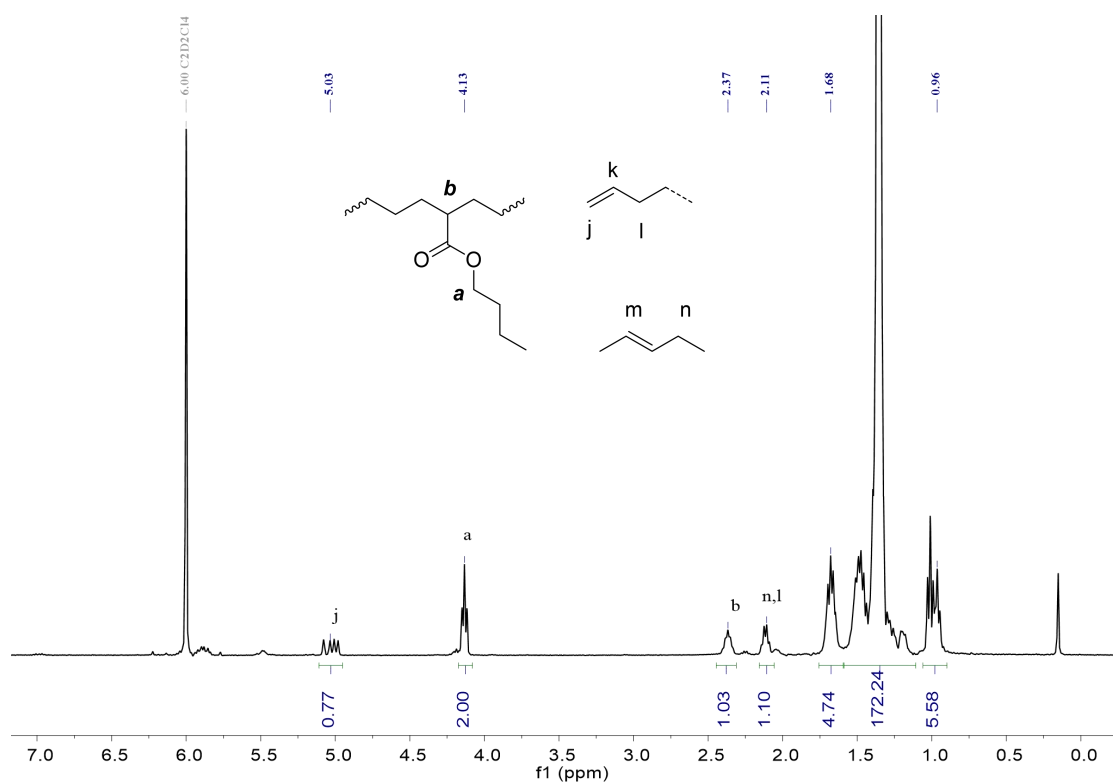

**Figure S46.**  $^1\text{H}$  NMR spectrum (400 MHz,  $\text{C}_2\text{D}_2\text{Cl}_4$ , 100  $^\circ\text{C}$ ) of the E-*n*BuA copolymer from table 2, entry 5. (assignments: ACS Catal. 2018, 8, 5963)

$$n\text{BuA (\%)} = \frac{a/2}{\frac{CH_3 + CH_2 - \frac{a}{2} \times 9}{4} + a/2} \times 100\% = \frac{1}{\frac{5.58 + 172.27 + 4.74 - \frac{2}{2} \times 9}{4} + 1} \times 100\% = 2.3\%$$

$$\begin{aligned} \text{Me Branches/ 1000C} &= \frac{\left(I_{CH_3} - \frac{j}{2} \times 3 - \frac{a}{2} \times 3\right) / 3}{\frac{CH_3}{3} + \frac{CH_2 + n + l + j - \frac{a}{2} \times 7}{2} + \frac{a}{2}} \times 1000 \\ &= \frac{\left(5.58 - \frac{0.77}{2} \times 3 - \frac{2}{2} \times 3\right) / 3}{\frac{5.58}{3} + \frac{172.24 + 4.74 + 1.10 + 0.77 - 7}{2} + 1} \times 1000 = 5.4 \end{aligned}$$

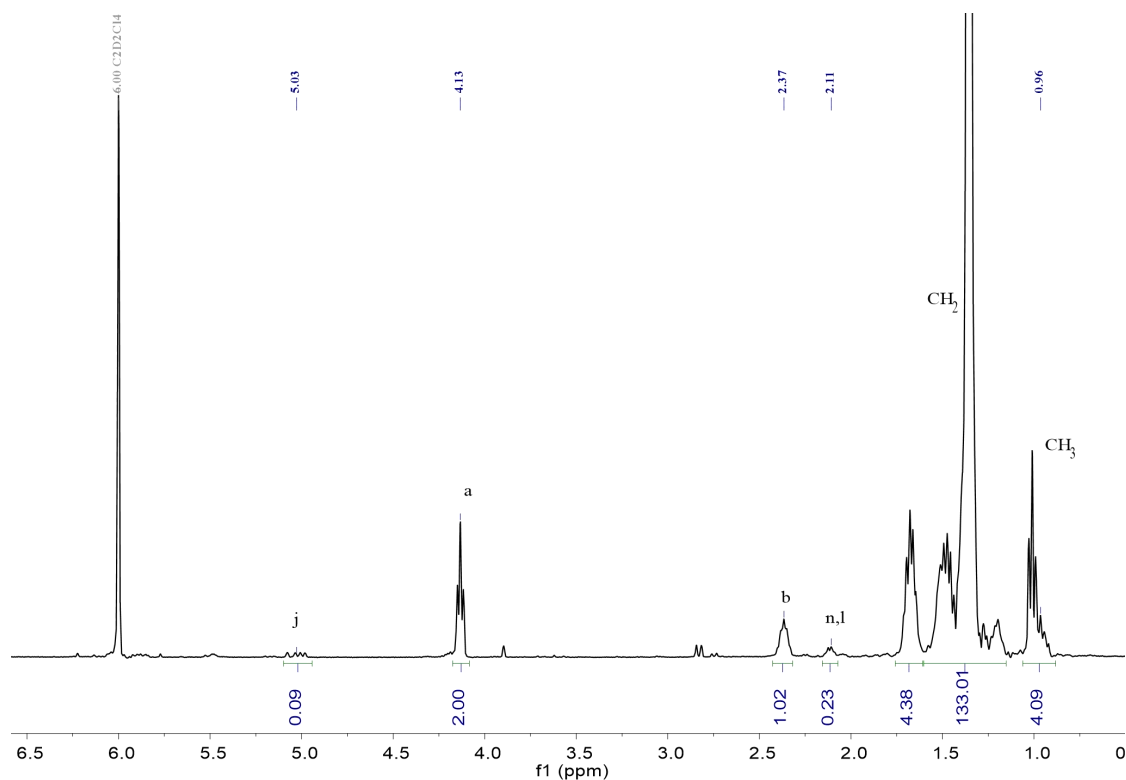

**Figure S47.**  $^1\text{H}$  NMR spectrum (400 MHz,  $\text{C}_2\text{D}_2\text{Cl}_4$ , 100  $^\circ\text{C}$ ) of the E-*n*BuA copolymer from table 2, entry 6. (assignments: ACS Catal. 2018, 8, 5963)

$$n\text{BuA (\%)} = \frac{a/2}{\frac{CH_3 + CH_2 - \frac{a}{2} \times 9}{4} + a/2} \times 100\% = \frac{1}{\frac{4.09 + 133.01 + 4.38 - \frac{2}{2} \times 9}{4} + 1} \times 100\% = 2.9\%$$

$$\begin{aligned} \text{Me Branches/ 1000C} &= \frac{\left(I_{CH_3} - \frac{j}{2} \times 3 - \frac{a}{2} \times 3\right)}{\frac{CH_3}{3} + \frac{CH_2 + n + l + j - \frac{a}{2} \times 7}{2} + \frac{a}{2}} \times 1000 \\ &= \frac{\left(4.09 - \frac{0.09}{2} \times 3 - \frac{2}{2} \times 3\right) / 3}{\frac{4.09}{3} + \frac{133.01 + 4.38 + 0.23 + 0.09 - 7}{2} + 1} \times 1000 = 4.7 \end{aligned}$$

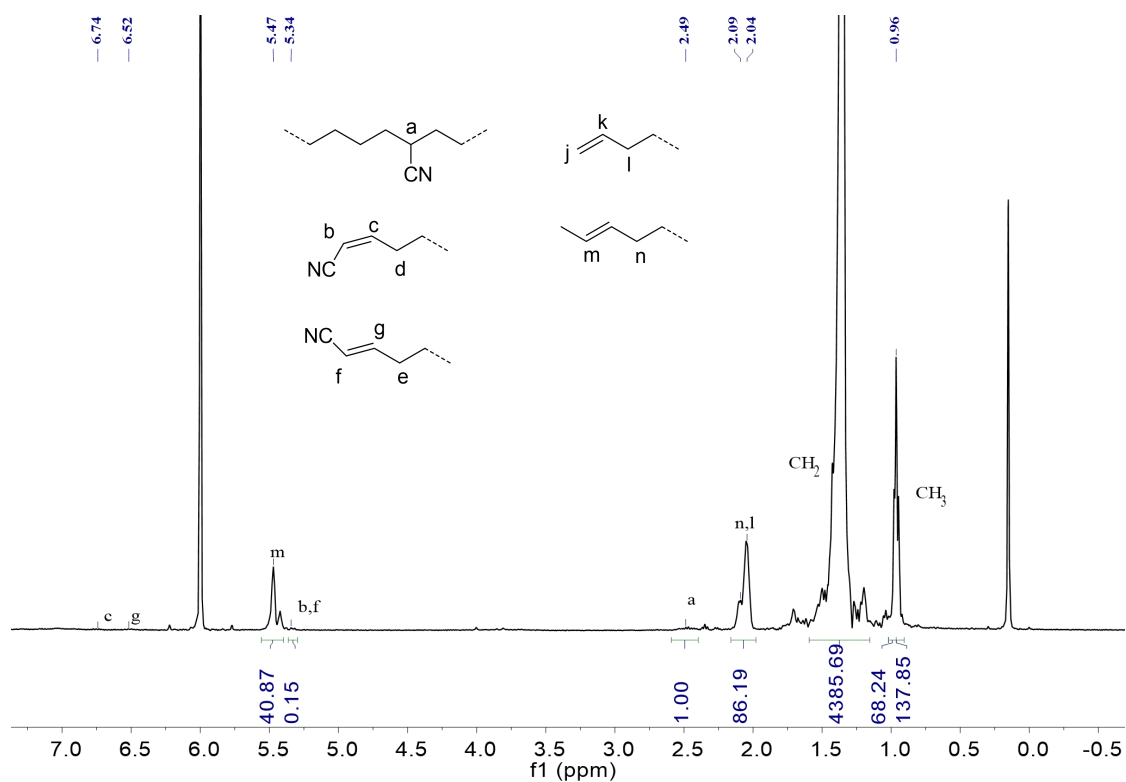

**Figure S48.**  $^1\text{H}$  NMR spectrum (400 MHz,  $\text{C}_2\text{D}_2\text{Cl}_4$ , 110  $^\circ\text{C}$ ) of the E-AN copolymer from table 2, entry 7.

$$\text{AN}(\%) = \frac{a/1}{\frac{(CH_3 + CH_2 - 2a)}{4} + a/1} \times 100\% = \frac{1}{\frac{(137.85 + 4385.69 - 2)}{4} + 1} \times 100\% = 0.09\%$$

$$\text{Me Branches/ 1000C} = \frac{1000 \times (I_{CH_3} - I_{CH_3}' \times 2) / 3}{\frac{I_{CH_3}}{3} + \frac{I_{CH_2} + n + l + m}{2}} \times 1000 = \frac{1000 \times (137.85 - 68.24 \times 2) / 3}{\frac{137.85}{3} + \frac{4385.69 + 86.19 + 40.87}{2}} = 0.2$$

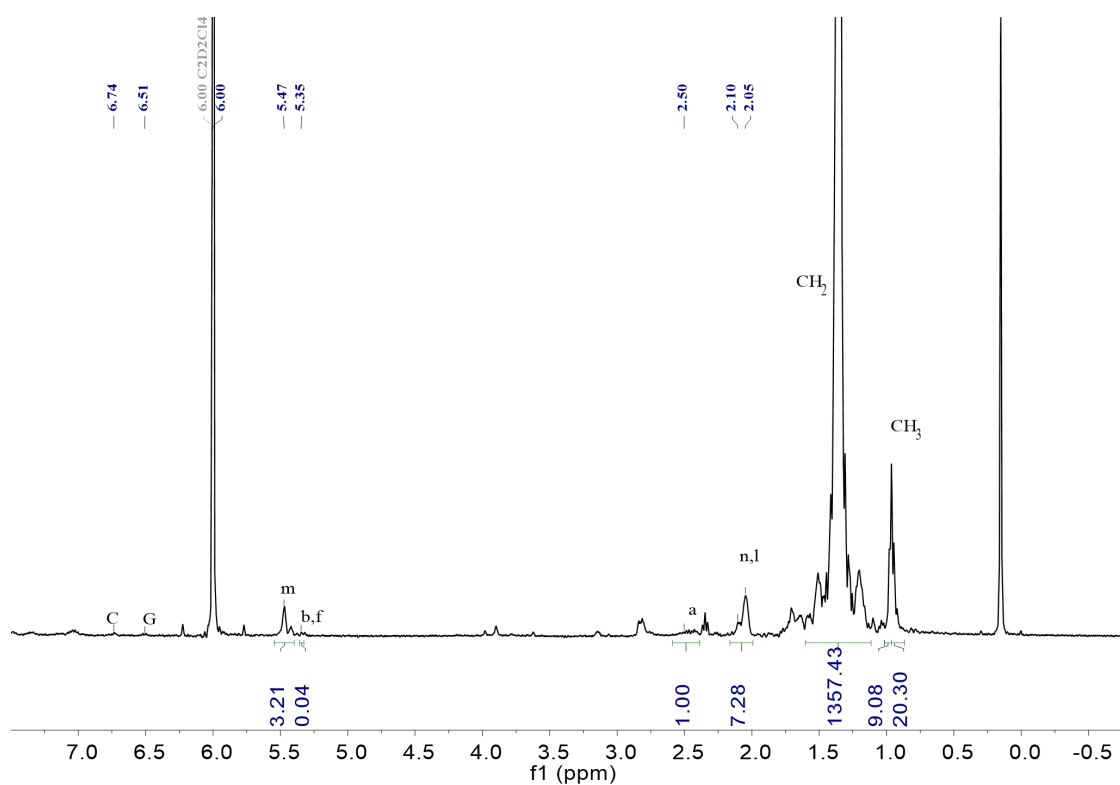

**Figure S49.**  $^1\text{H}$  NMR spectrum (400 MHz,  $\text{C}_2\text{D}_2\text{Cl}_4$ , 110  $^\circ\text{C}$ ) of the E-AN copolymer from table 2, entry 8.

$$\text{AN}(\%) = \frac{a/1}{\frac{(CH_3 + CH_2 - 2a)}{4} + a/1} \times 100\% = \frac{1}{\frac{(20.30 + 1357.43 - 2)}{4} + 1} \times 100\% = 0.29\%$$

$$\text{Me Branches/ 1000C} = \frac{1000 \times (I_{CH_3} - I_{CH_3}' \times 2) / 3}{\frac{I_{CH_3}}{3} + \frac{I_{CH_2} + n + l}{2}} \times 1000 = \frac{1000 \times (20.03 - 9.08 \times 2) / 3}{\frac{20.03}{3} + \frac{1357.43 + 7.28}{2}} = 1.0$$



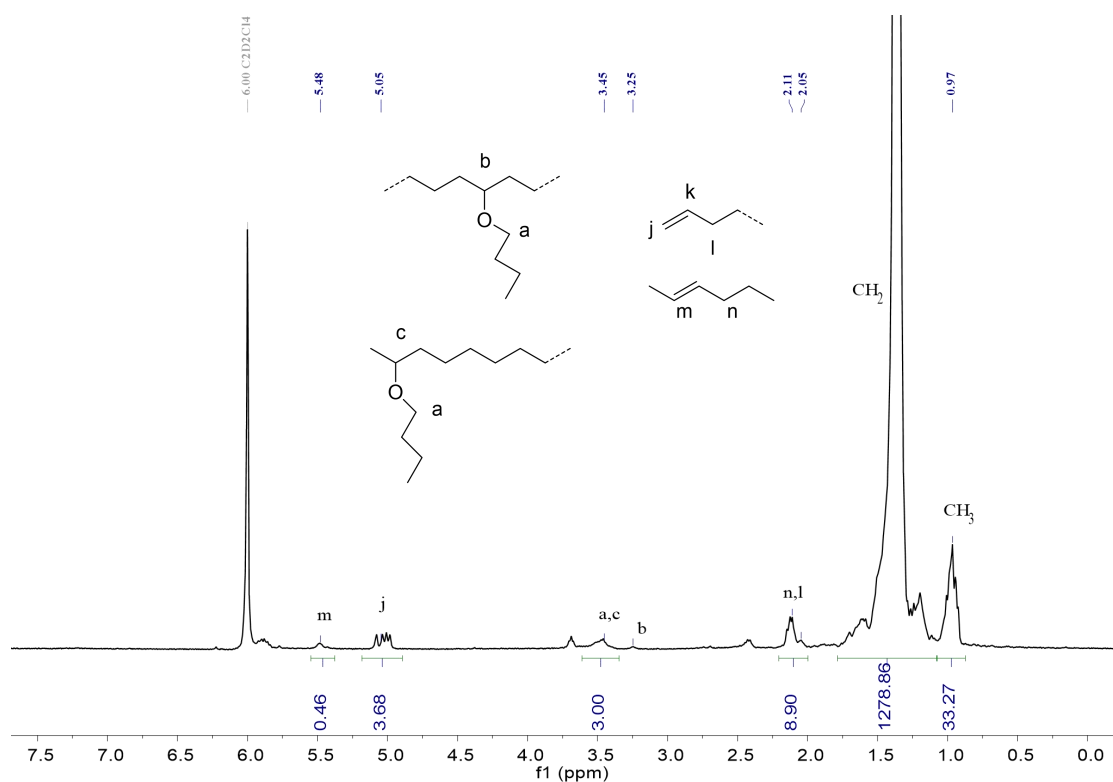

**Figure S50.**  $^1\text{H}$  NMR spectrum (400 MHz,  $\text{C}_2\text{D}_2\text{Cl}_4$ , 100  $^\circ\text{C}$ ) of the E-*n*BuVE copolymer from table 2, entry 9. (assignments: JACS. 2007, 129, 8946)

$$n\text{BuVE (\%)} = \frac{\frac{(a+b+c)/3}{\left(\frac{\text{CH}_3 + \text{CH}_2 - \frac{(a+b+c)}{3} \times 9\right)} + (a+b+c)/3}{\frac{3/3}{(33.27 + 1278.86 - 9)} + 1}} = 0.3\%$$

$$\begin{aligned} \text{Me Branches/ 1000C} &= \frac{\left[ \frac{I_{\text{CH}_3} - \frac{j+m}{2} \times 3 - \left( \frac{a+b+c}{3} \right) \times 3 \right] / 3}{\frac{\text{CH}_3}{3} + \frac{\text{CH}_2 + n + l + j - 8 \times (a+b+c)/3}{2} + \frac{a+b+c}{3}} \times 1000 \\ &= \frac{\left( \frac{33.27 - \frac{3.68 + 0.46}{2} \times 3 - \frac{3}{3} \times 3 \right) / 3}{\frac{33.27}{3} + \frac{1278.86 + 8.90 + 3.68 + 0.46 - 8}{2} + 1} \times 1000 = 12.2 \end{aligned}$$

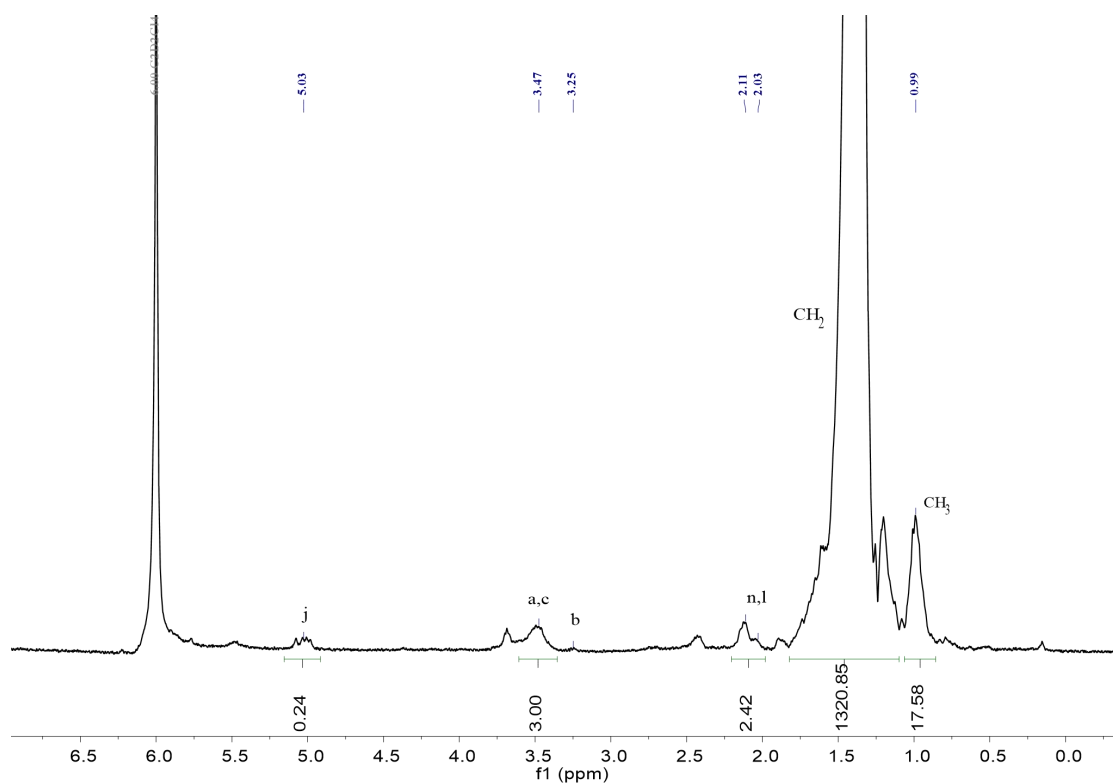

**Figure S51.**  $^1\text{H}$  NMR spectrum (400 MHz,  $\text{C}_2\text{D}_2\text{Cl}_4$ , 110  $^\circ\text{C}$ ) of the E-*n*BuVE copolymer from table 2, entry 10.

$$n\text{BuVE (\%)} = \frac{(a+b+c)/3}{\frac{(CH_3+CH_2-(a+b+c)\div 3\times 9)}{4} + (a+b+c)/3} \times 100\% = \frac{3/3}{\frac{(17.58+1320.85-9)}{4} + 1} = 0.3\%$$

$$\begin{aligned} \text{Me Branches/ 1000C} &= \frac{\left[ I_{CH_3} - \frac{j}{2} \times 3 - \left( \frac{a+b+c}{3} \right) \times 3 \right] / 3}{\frac{CH_3}{3} + \frac{CH_2+n+l+j-8\times(a+b+c)/3}{2} + \frac{a+b+c}{3}} \times 1000 \\ &= \frac{\left( 17.58 - \frac{0.24}{2} \times 3 - \frac{3}{3} \times 3 \right) / 3}{\frac{17.58}{3} + \frac{1320.85+2.42+0.24-8}{2} + 1} \times 1000 = 7.1 \end{aligned}$$

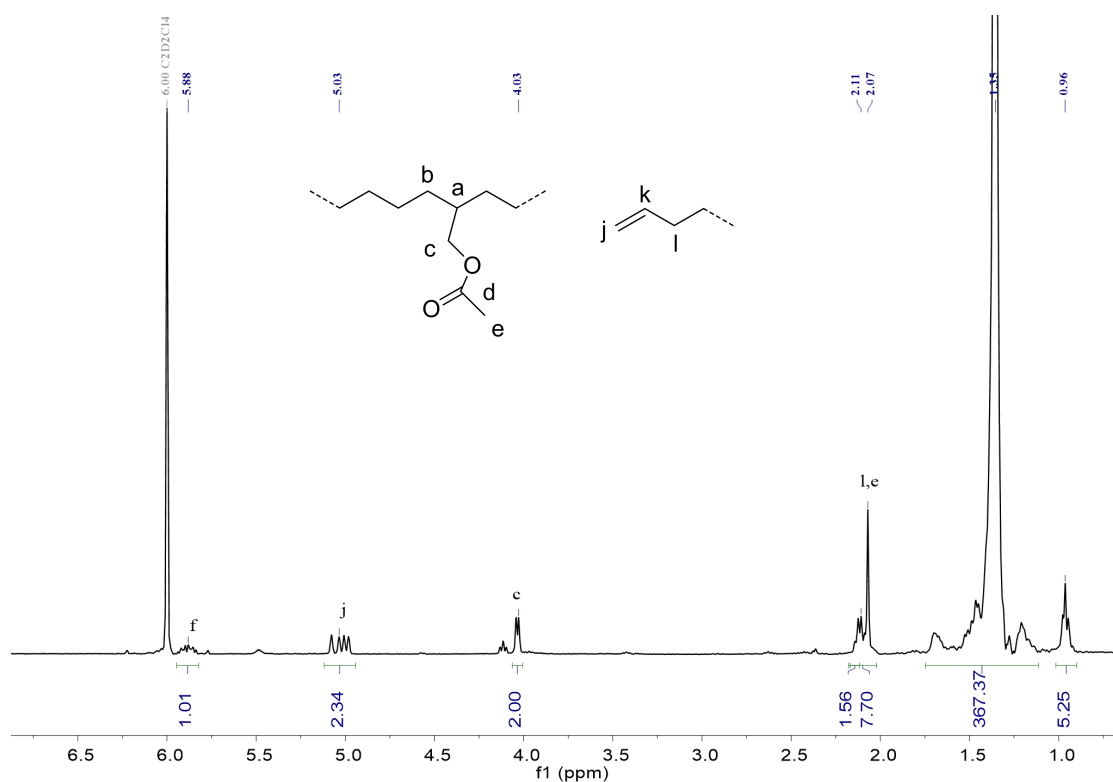

**Figure S52.**  $^1\text{H}$  NMR spectrum (400 MHz,  $\text{C}_2\text{D}_2\text{Cl}_4$ , 110  $^\circ\text{C}$ ) of the E-AAC copolymer from table 2, entry 11.

$$\text{AAc (\%)} = \frac{c/2}{\frac{(I_{\text{CH}_3} + I_{\text{CH}_2} - 3a)}{4} + \frac{c}{2}} \times 100\% = \frac{2/2}{\frac{(5.25 + 367.37 - 1.5 \times 2)}{4} + \frac{2}{2}} \times 100\% = 1.1\%$$

$$\text{Me Branches/ 1000C} = \frac{(I_{\text{CH}_3} - \frac{j}{2} \times 3)/3}{\frac{I_{\text{CH}_3}}{3} + \frac{I_{\text{CH}_2} + l + j - a}{2} + \frac{c}{2}} \times 1000 = \frac{(5.25 - \frac{2.34}{2} \times 3)/3 \times 1000}{\frac{5.25}{3} + \frac{367.37 + 2.34 + 7.70 - 4}{2} + 1} = 3.1$$

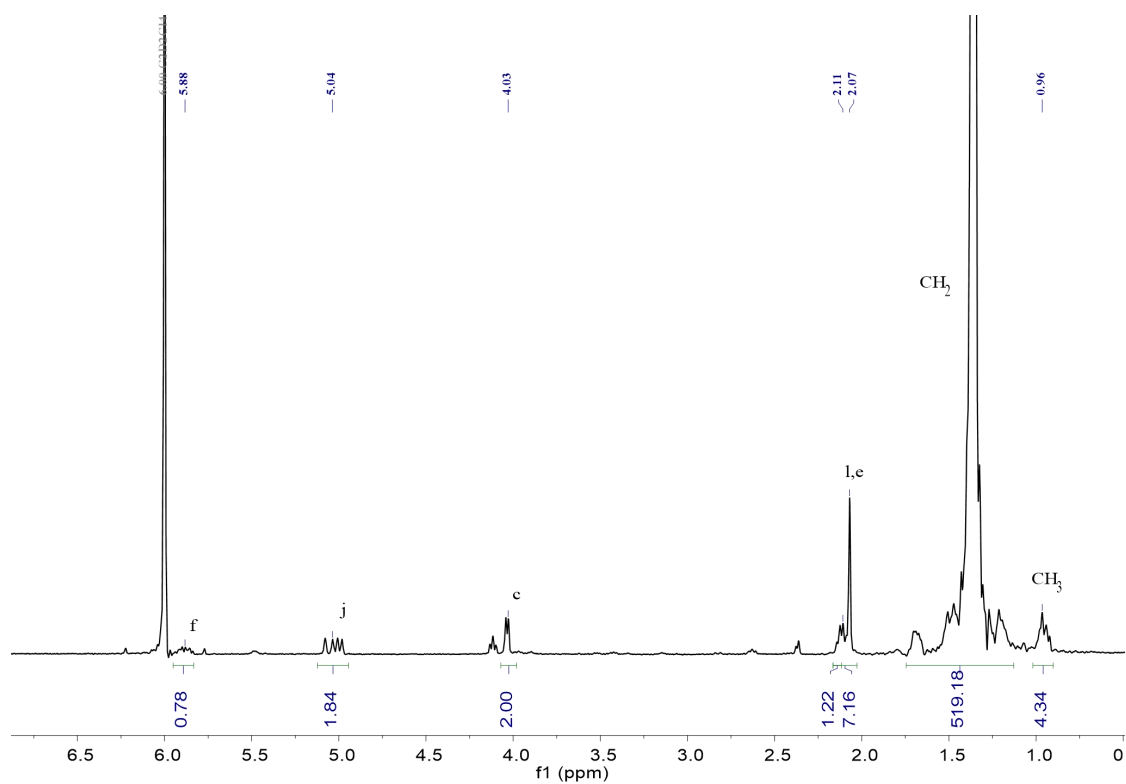

**Figure S53.**  $^1\text{H}$  NMR spectrum (400 MHz,  $\text{C}_2\text{D}_2\text{Cl}_4$ , 110  $^\circ\text{C}$ ) of the E-AAC copolymer from table 2, entry 12.

$$\text{AAc (\%)} = \frac{c/2}{\frac{(I_{\text{CH}_3} + I_{\text{CH}_2} - 3a)}{4} + \frac{c}{2}} \times 100\% = \frac{2/2}{\frac{(4.34 + 519.18 - 1.5 \times 2)}{4} + \frac{2}{2}} \times 100\% = 0.8\%$$

$$\text{Me Branches/ 1000C} = \frac{(I_{\text{CH}_3} - \frac{j}{2} \times 3)/3}{\frac{I_{\text{CH}_3}}{3} + \frac{I_{\text{CH}_2} + l + j - a}{2} + \frac{c}{2}} \times 1000 = \frac{(4.34 - \frac{1.84}{2} \times 3)/3 \times 1000}{\frac{4.34}{3} + \frac{519.18 + 1.84 + 7.16 - 4}{2} + 1} = 2.0$$

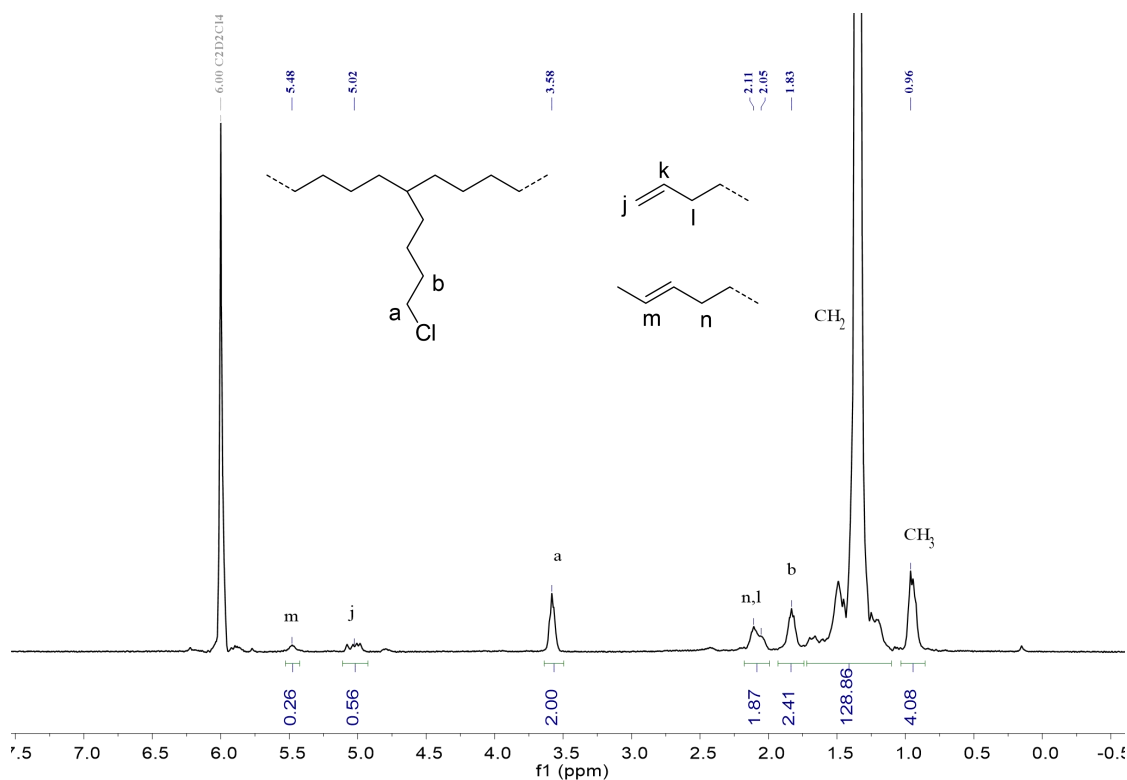

**Figure S54.**  $^1\text{H}$  NMR spectrum (400 MHz,  $\text{C}_2\text{D}_2\text{Cl}_4$ , 110 °C) of the copolymer from table 2, entry 13.

$$X\% = \frac{a/2}{\frac{(I_{\text{CH}_3} + I_{\text{CH}_2} - 3.5a)}{4} + a/2} = \frac{2/2}{\frac{(128.86 + 4.08 - 3.5 \times 2)}{4} + 2/2} = 3.1\%$$

$$\text{Me Branches/ 1000C} = \frac{(I_{\text{CH}_3} - \frac{j+m}{2} \times 3)/3}{\frac{I_{\text{CH}_3}}{3} + \frac{I_{\text{CH}_2} + n + l + j + m - 2.5a}{2} + \frac{a}{2}} \times 1000 =$$

$$\frac{1000 \times (4.08 - 3 \times \frac{0.56 + 0.26}{2})/3}{\frac{4.08}{3} + (128.86 + 1.87 + 0.56 + 0.26 - 2.5 \times 2)/2 + 2/2} = 14.4$$

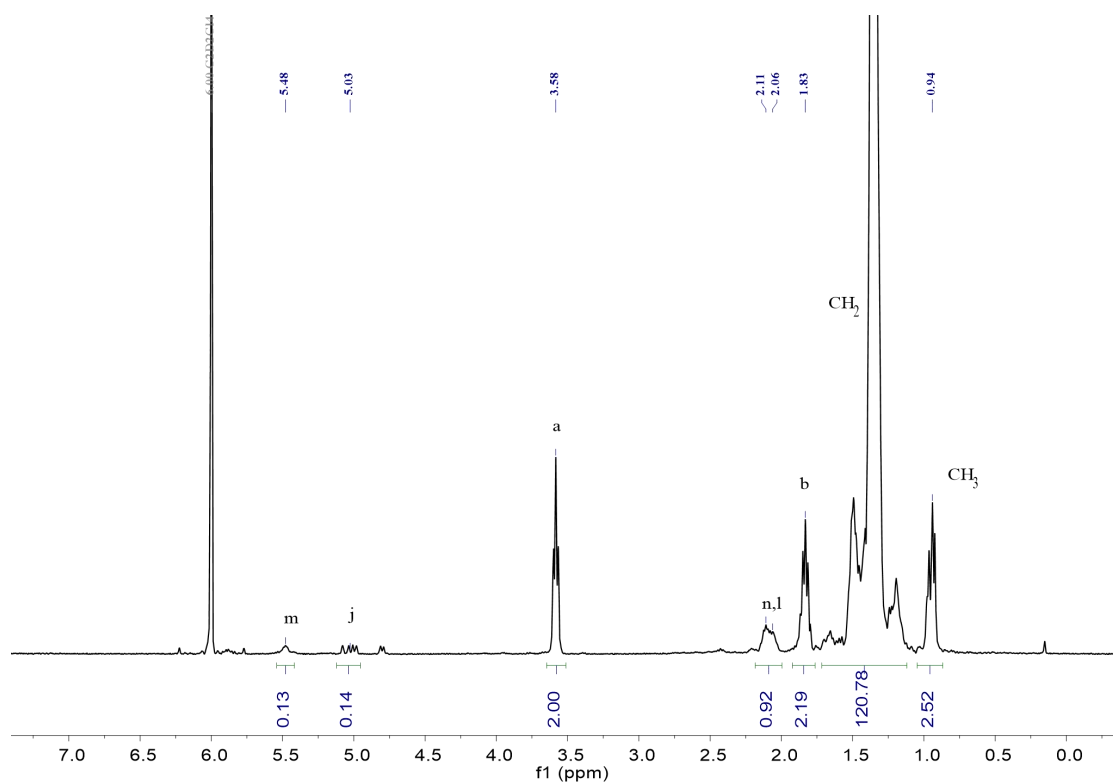

**Figure S55.**  $^1\text{H}$  NMR spectrum (400 MHz,  $\text{C}_2\text{D}_2\text{Cl}_4$ , 110  $^\circ\text{C}$ ) of the copolymer from table 2, entry 14.

$$X\% = \frac{a/2}{\frac{(I_{\text{CH}_3} + I_{\text{CH}_2} - 3.5a)}{4} + a/2} = \frac{2/2}{\frac{(120.78 + 2.52 - 3.5 \times 2)}{4} + 2/2} = 3.3\%$$

$$\text{Me Branches/ 1000C} = \frac{(I_{\text{CH}_3} - \frac{j+m}{2} \times 3)/3}{\frac{I_{\text{CH}_3}}{3} + \frac{I_{\text{CH}_2} + n + l + j + m - 2.5a}{2} + \frac{a}{2}} \times 1000 =$$

$$\frac{1000 \times (2.52 - 3 \times \frac{0.14 + 0.13}{2})/3}{\frac{2.52}{3} + (120.78 + 0.92 + 0.14 + 0.13 - 2.5 \times 2)/2 + 2/2} = 11.7$$

#### 4. GPC traces and DSC data of (co)polymers

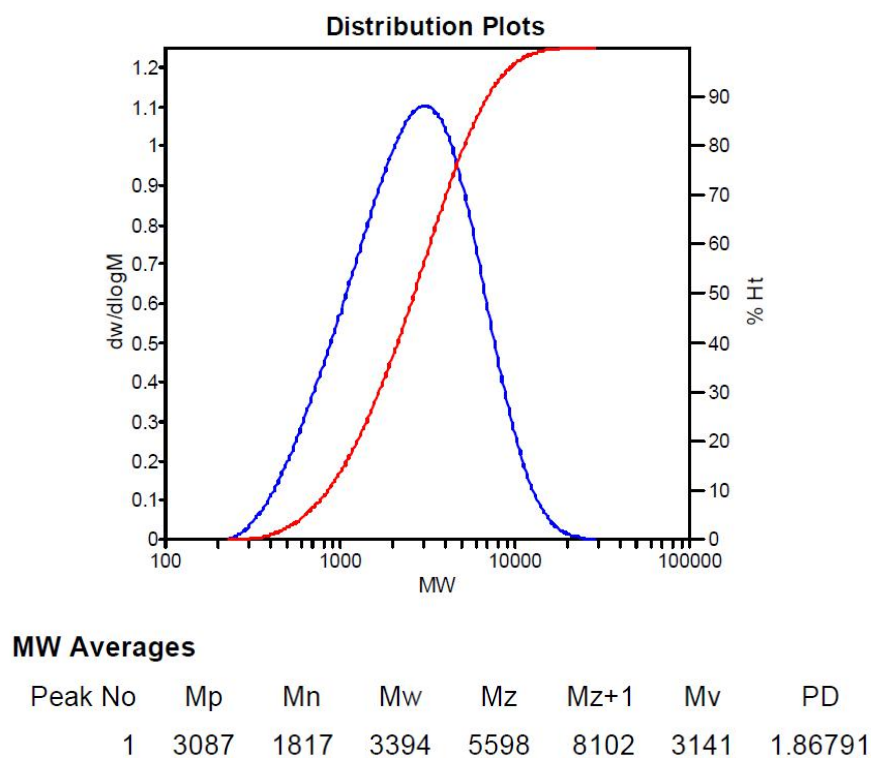

**Figure S56.** GPC trace of the polymer from table 1, entry 1.

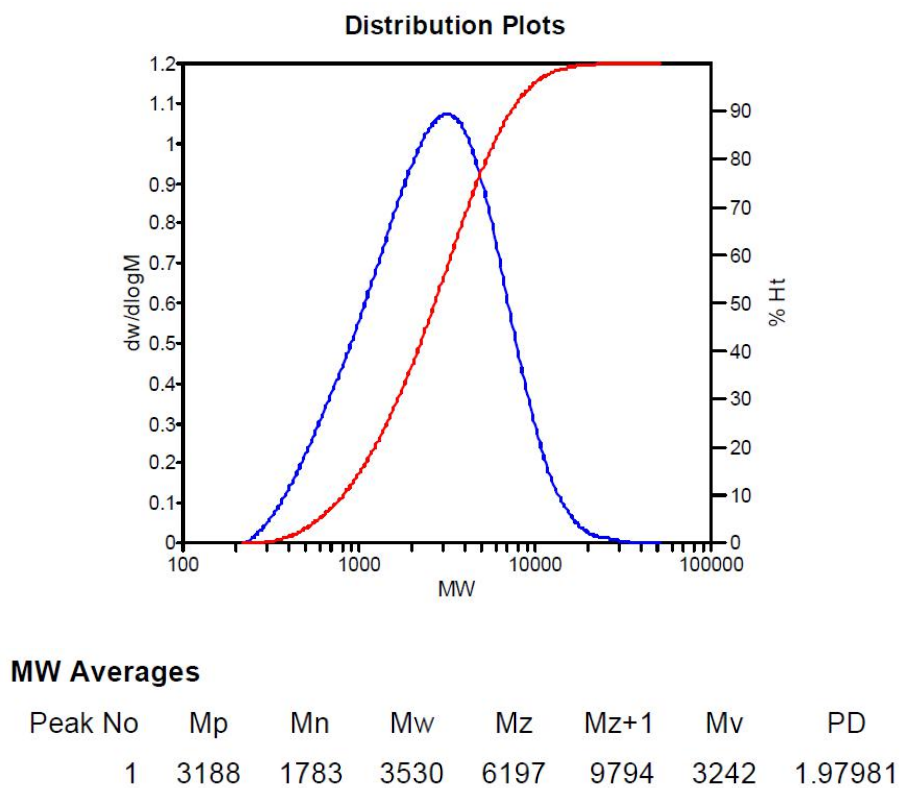

**Figure S57.** GPC trace of the polymer from table 1, entry 2.

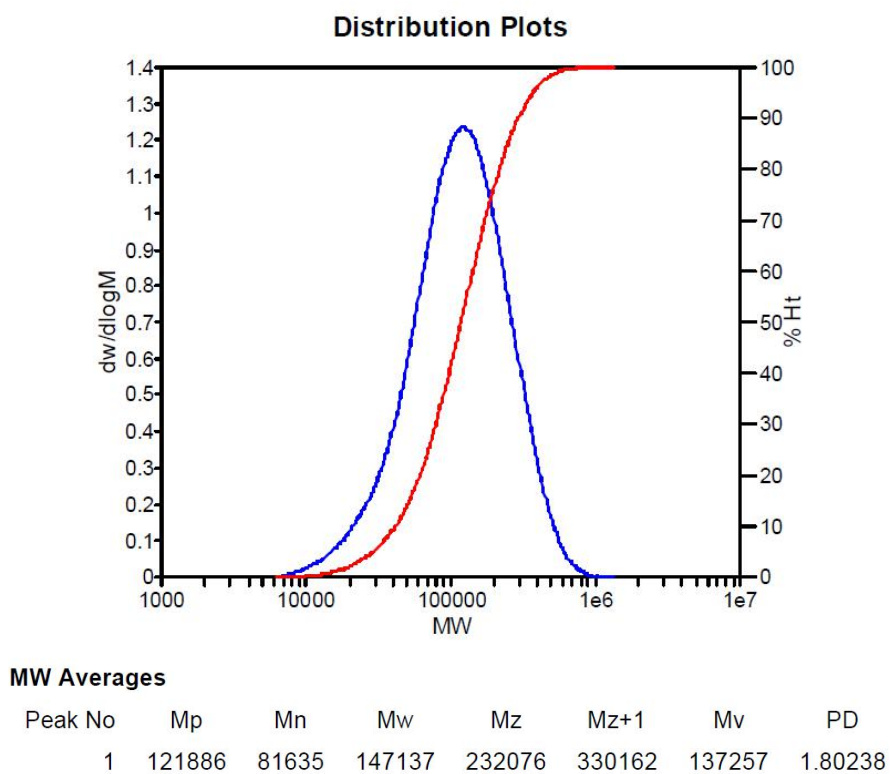

**Figure S58.** GPC trace of the polymer from table 1, entry 3.

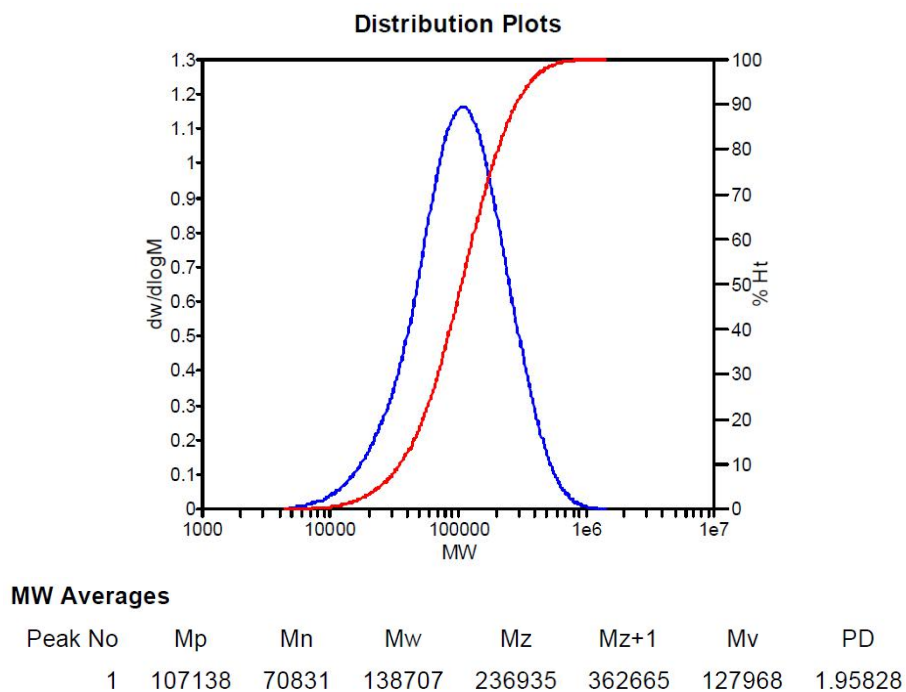

**Figure S59.** GPC trace of the polymer from table 1, entry 4.



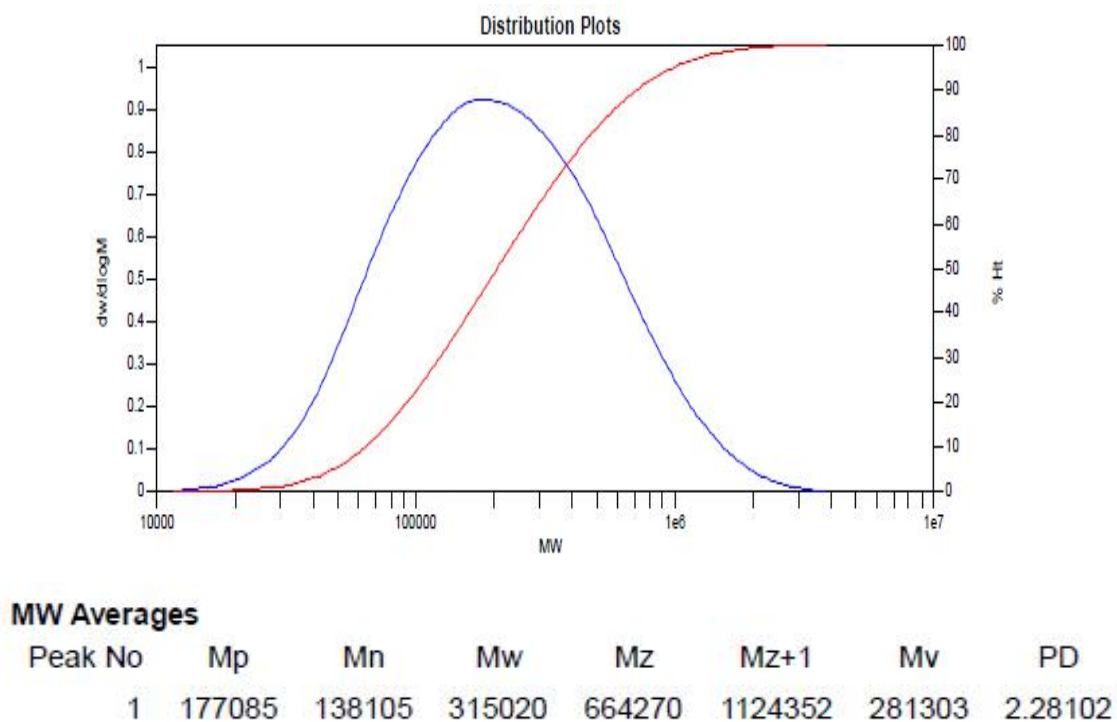

**Figure S60.** GPC trace of the polymer from table 1, entry 5.

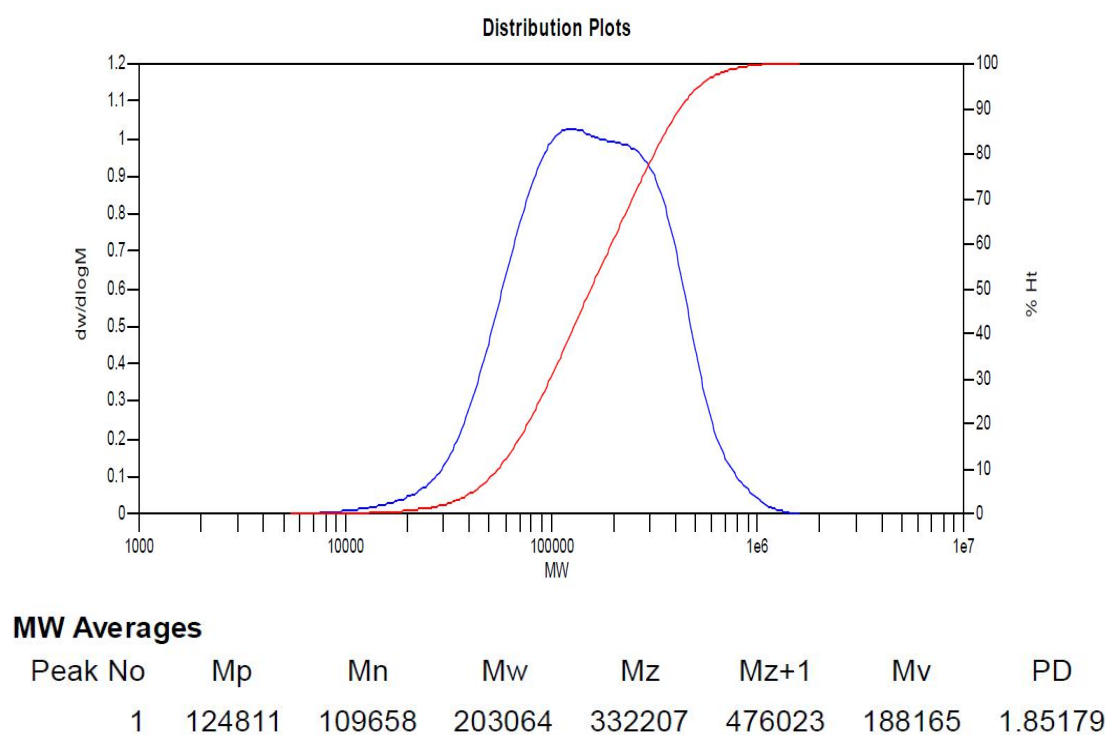

**Figure S61.** GPC trace of the polymer from table 1, entry 6.

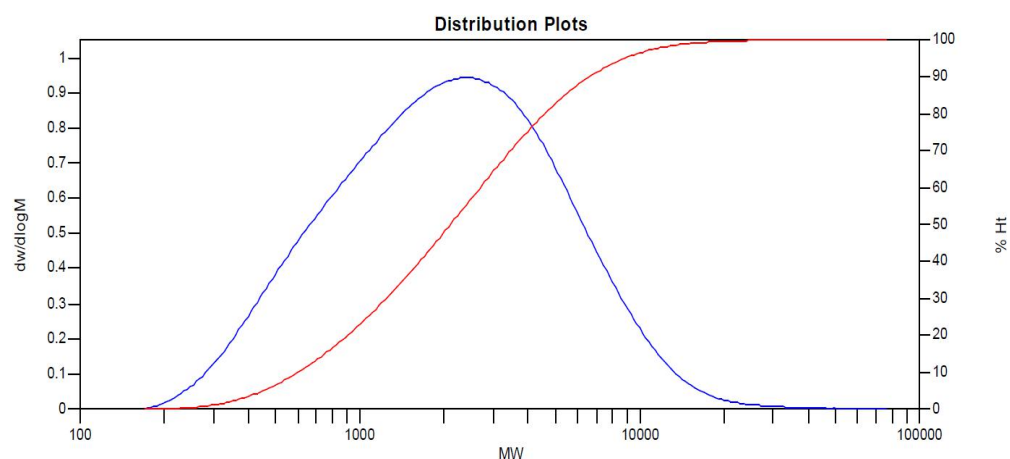

**MW Averages**

| Peak No | Mp   | Mn   | Mw   | Mz   | Mz+1  | Mv   | PD      |
|---------|------|------|------|------|-------|------|---------|
| 1       | 2468 | 1361 | 3025 | 6263 | 12287 | 2720 | 2.22263 |

**Figure S62.** GPC trace of the polymer from table 1, entry 7.

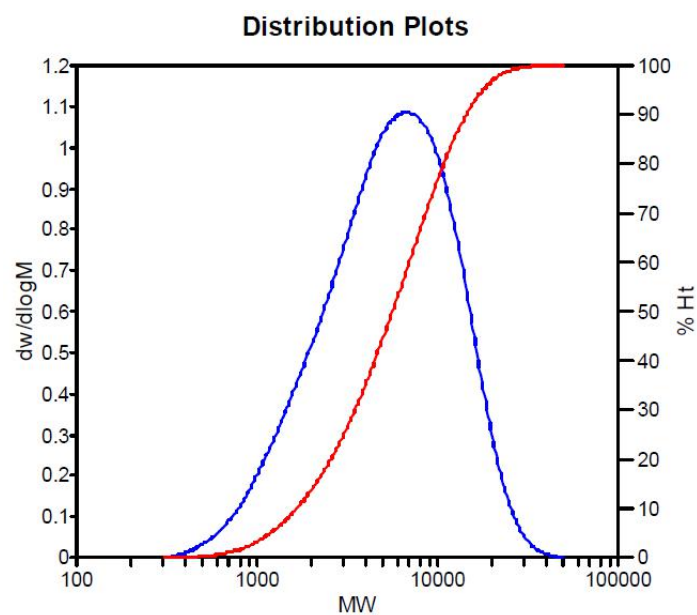

**MW Averages**

| Peak No | Mp   | Mn   | Mw   | Mz    | Mz+1  | Mv   | PD      |
|---------|------|------|------|-------|-------|------|---------|
| 1       | 6803 | 3604 | 7021 | 11218 | 15428 | 6508 | 1.94811 |

**Figure S63.** GPC trace of the polymer from table 1, entry 8.

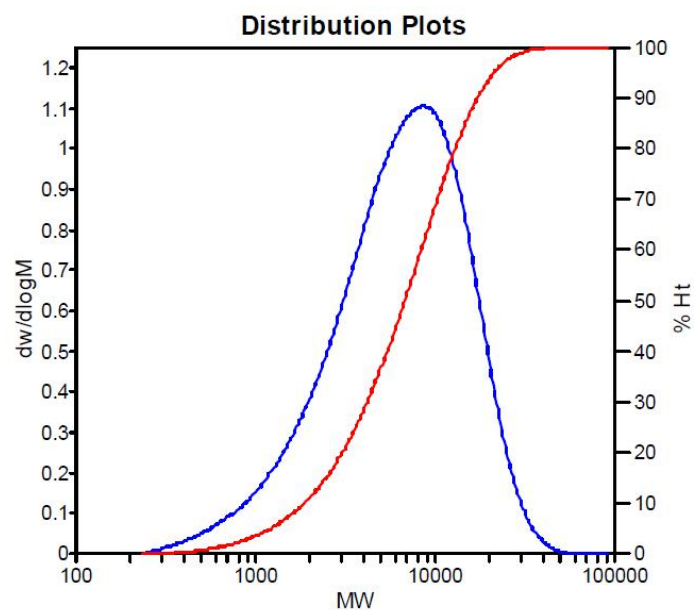

**MW Averages**

| Peak No | Mp   | Mn   | Mw   | Mz    | Mz+1  | Mv   | PD      |
|---------|------|------|------|-------|-------|------|---------|
| 1       | 8389 | 3921 | 8379 | 13505 | 18982 | 7750 | 2.13695 |

**Figure S64.** GPC trace of the polymer from table 1, entry 9.

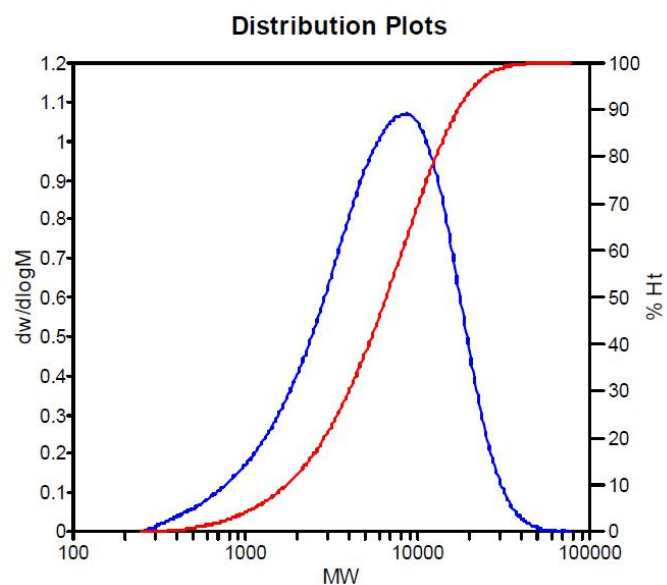

**MW Averages**

| Peak No | Mp   | Mn   | Mw   | Mz    | Mz+1  | Mv   | PD      |
|---------|------|------|------|-------|-------|------|---------|
| 1       | 8664 | 3725 | 8262 | 13665 | 19427 | 7608 | 2.21799 |

**Figure S65.** GPC trace of the polymer from table 1, entry 10.

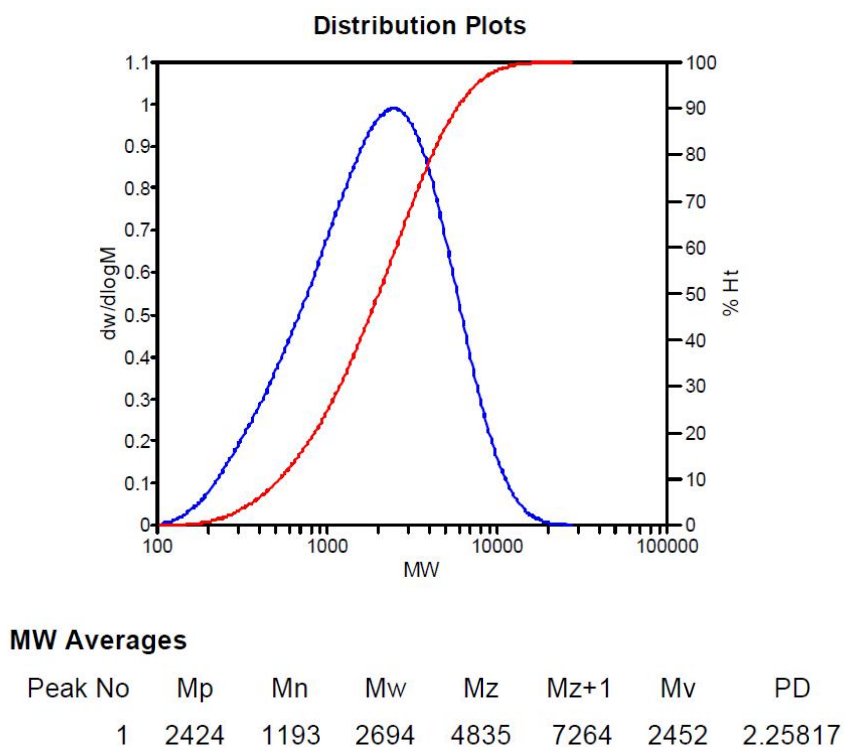

**Figure S66.** GPC trace of the polymer from table 1, entry 11.

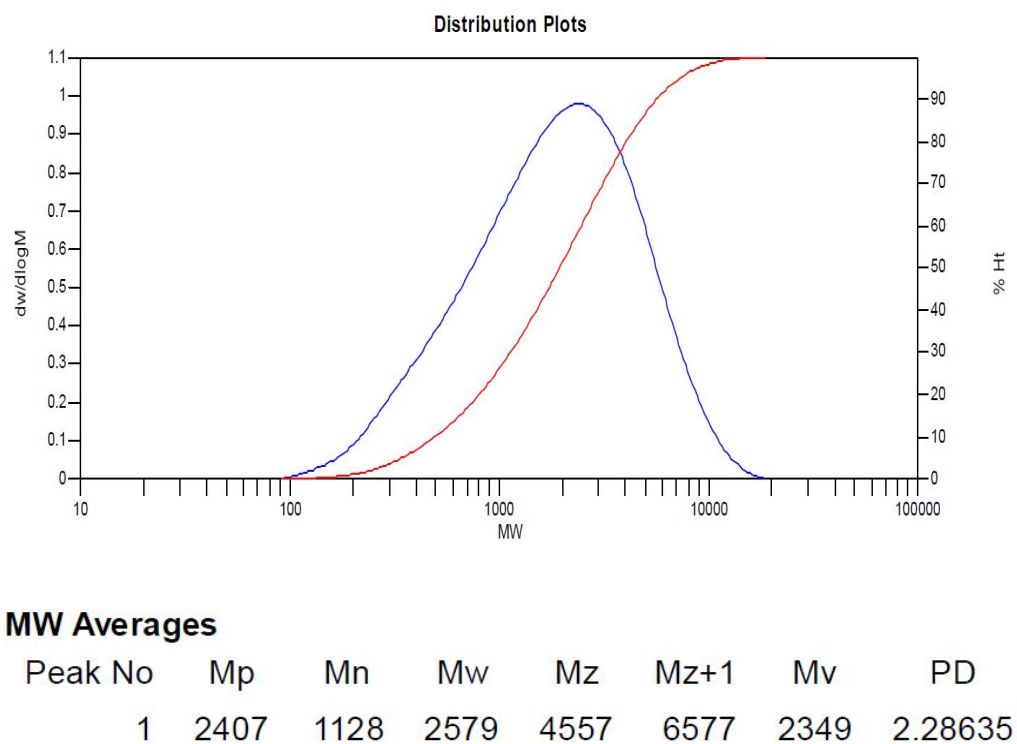

**Figure S67.** GPC trace of the polymer from table 1, entry 12.

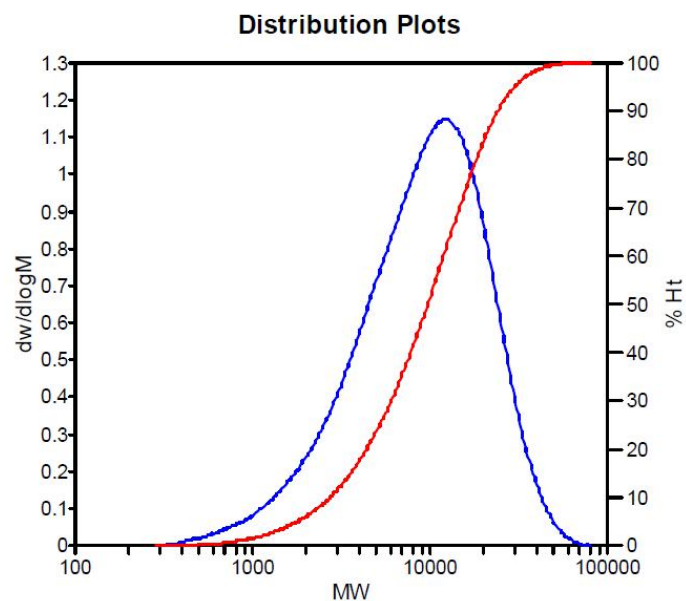

**MW Averages**

| Peak No | Mp    | Mn   | Mw    | Mz    | Mz+1  | Mv    | PD      |
|---------|-------|------|-------|-------|-------|-------|---------|
| 1       | 12155 | 5664 | 11898 | 18905 | 25910 | 11027 | 2.10064 |

**Figure S68.** GPC trace of the polymer from table 1, entry 13.

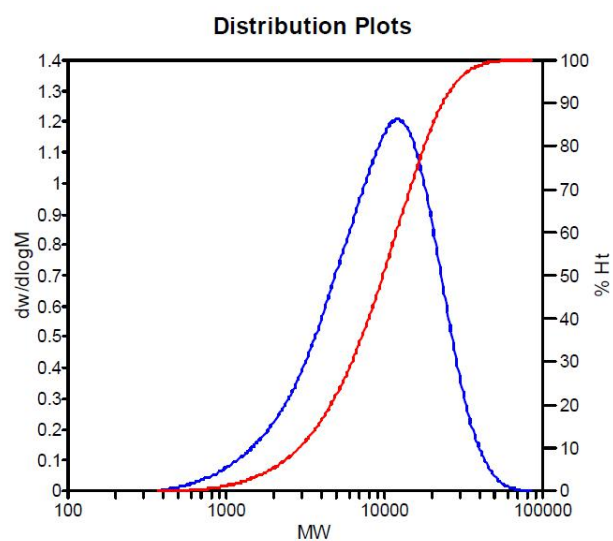

**MW Averages**

| Peak No | Mp    | Mn   | Mw    | Mz    | Mz+1  | Mv    | PD      |
|---------|-------|------|-------|-------|-------|-------|---------|
| 1       | 12155 | 5946 | 11746 | 18156 | 24677 | 10944 | 1.97545 |

**Figure S69.** GPC trace of the polymer from table 1, entry 14.

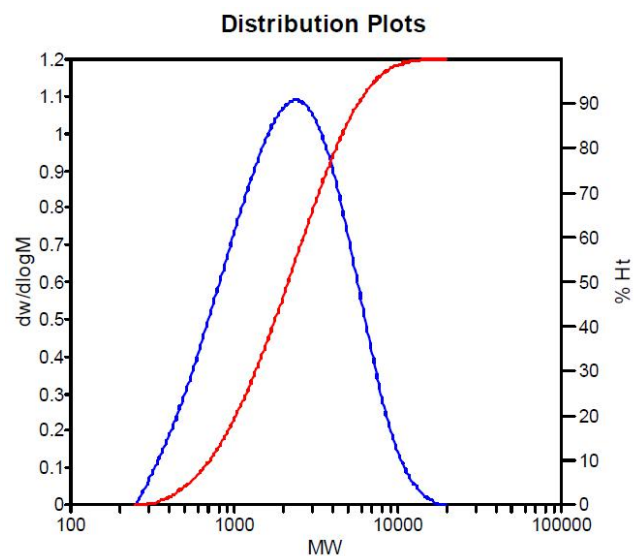

**MW Averages**

| Peak No | Mp   | Mn   | Mw   | Mz   | Mz+1 | Mv   | PD      |
|---------|------|------|------|------|------|------|---------|
| 1       | 2388 | 1509 | 2755 | 4507 | 6403 | 2553 | 1.82571 |

**Figure S70.** GPC trace of the polymer from table 2, entry 2.

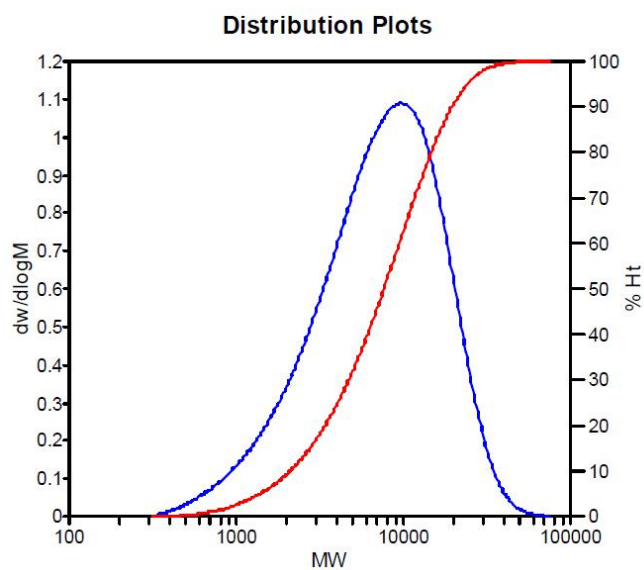

**MW Averages**

| Peak No | Mp   | Mn   | Mw   | Mz    | Mz+1  | Mv   | PD     |
|---------|------|------|------|-------|-------|------|--------|
| 1       | 9717 | 4503 | 9518 | 15414 | 21431 | 8794 | 2.1137 |

**Figure S71.** GPC trace of the polymer from table 2, entry 3.

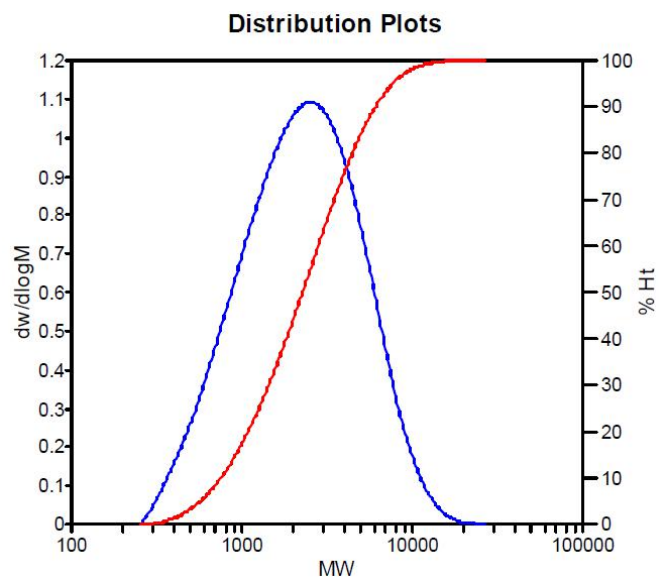

**MW Averages**

| Peak No | Mp   | Mn   | Mw   | Mz   | Mz+1 | Mv   | PD      |
|---------|------|------|------|------|------|------|---------|
| 1       | 2587 | 1602 | 2937 | 4879 | 7154 | 2718 | 1.83333 |

**Figure S72.** GPC trace of the polymer from table 2, entry 5.

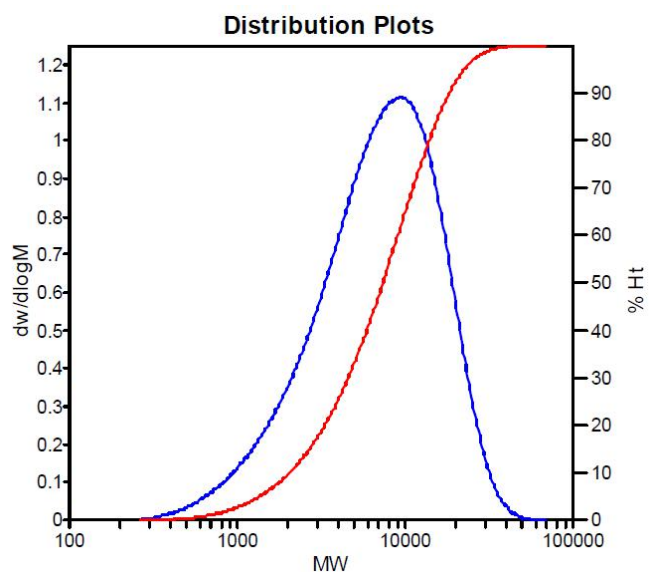

**MW Averages**

| Peak No | Mp   | Mn   | Mw   | Mz    | Mz+1  | Mv   | PD      |
|---------|------|------|------|-------|-------|------|---------|
| 1       | 9563 | 4356 | 8999 | 14164 | 19129 | 8348 | 2.06589 |

**Figure S73.** GPC trace of the polymer from table 2, entry 6.



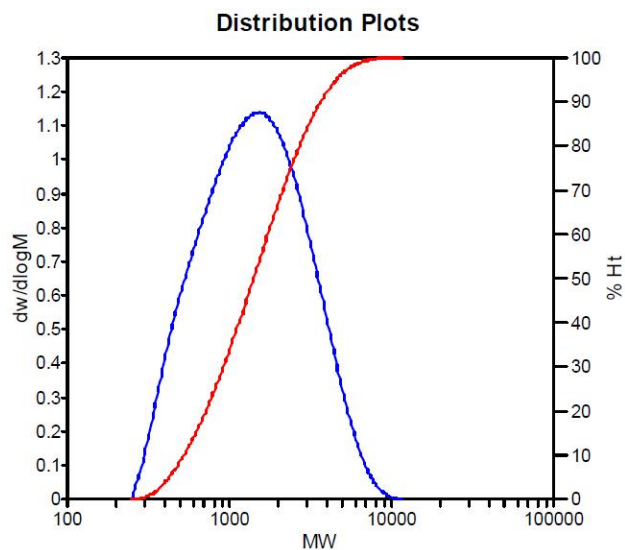

**MW Averages**

| Peak No | Mp   | Mn   | Mw   | Mz   | Mz+1 | Mv   | PD      |
|---------|------|------|------|------|------|------|---------|
| 1       | 1553 | 1082 | 1794 | 2804 | 3886 | 1677 | 1.65804 |

**Figure S74.** GPC trace of the polymer from table 2, entry 7.

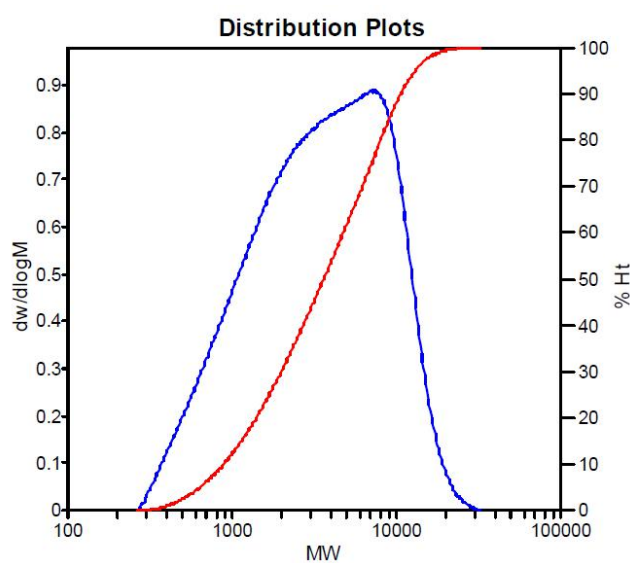

**MW Averages**

| Peak No | Mp   | Mn   | Mw   | Mz   | Mz+1  | Mv   | PD      |
|---------|------|------|------|------|-------|------|---------|
| 1       | 7293 | 2110 | 4843 | 8306 | 11306 | 4412 | 2.29526 |

**Figure S75.** GPC trace of the polymer from table 2, entry 9.



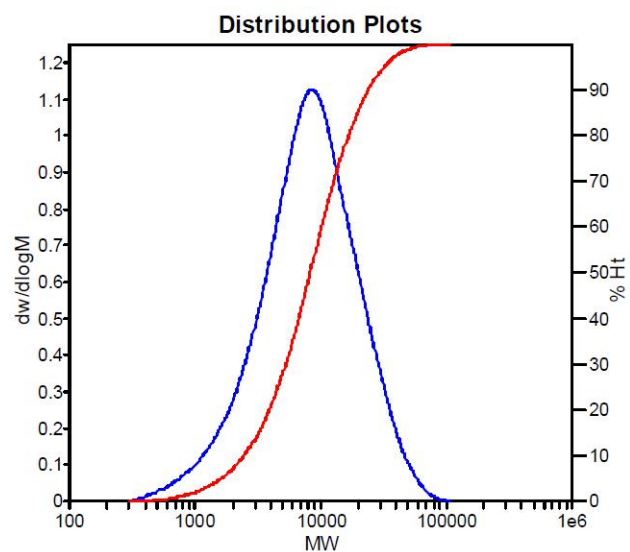

#### MW Averages

| Peak No | Mp   | Mn   | Mw    | Mz    | Mz+1  | Mv    | PD      |
|---------|------|------|-------|-------|-------|-------|---------|
| 1       | 8691 | 5072 | 11255 | 20561 | 32036 | 10259 | 2.21905 |

**Figure S76.** GPC trace of the polymer from table 2, entry 10.

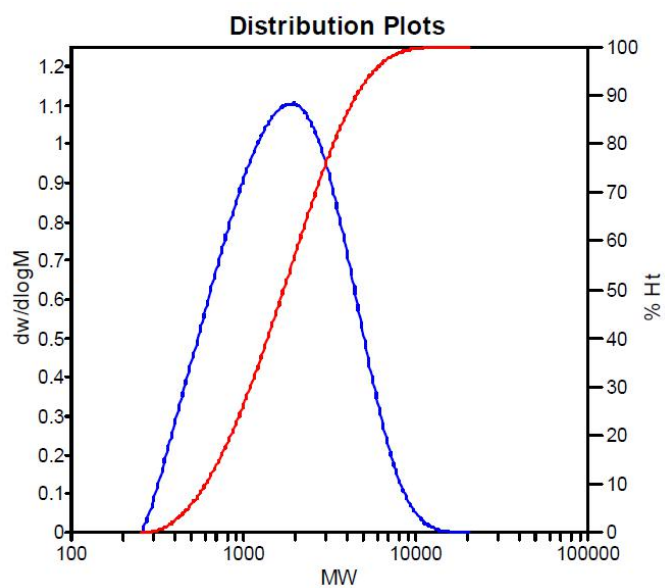

#### MW Averages

| Peak No | Mp   | Mn   | Mw   | Mz   | Mz+1 | Mv   | PD      |
|---------|------|------|------|------|------|------|---------|
| 1       | 1941 | 1269 | 2206 | 3566 | 5106 | 2050 | 1.73838 |

**Figure S77.** GPC trace of the polymer from table 2, entry 11.

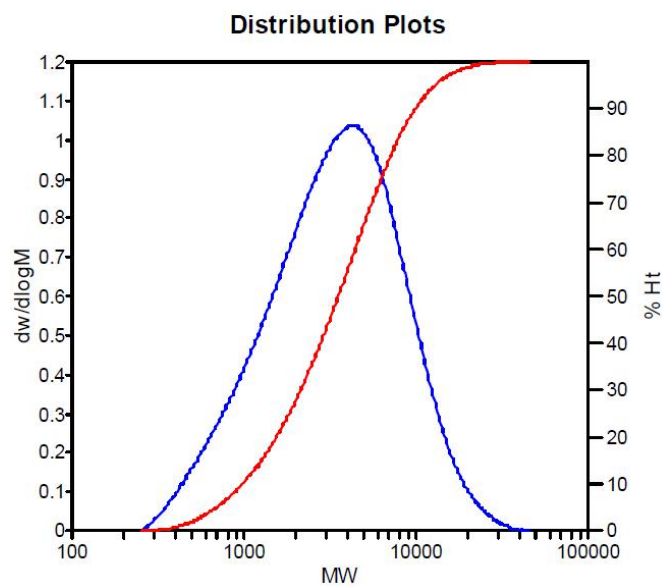

**MW Averages**

| Peak No | Mp   | Mn   | Mw   | Mz   | Mz+1  | Mv   | PD      |
|---------|------|------|------|------|-------|------|---------|
| 1       | 4240 | 2209 | 4712 | 8476 | 13016 | 4300 | 2.13309 |

**Figure S78.** GPC trace of the polymer from table 2, entry 12.

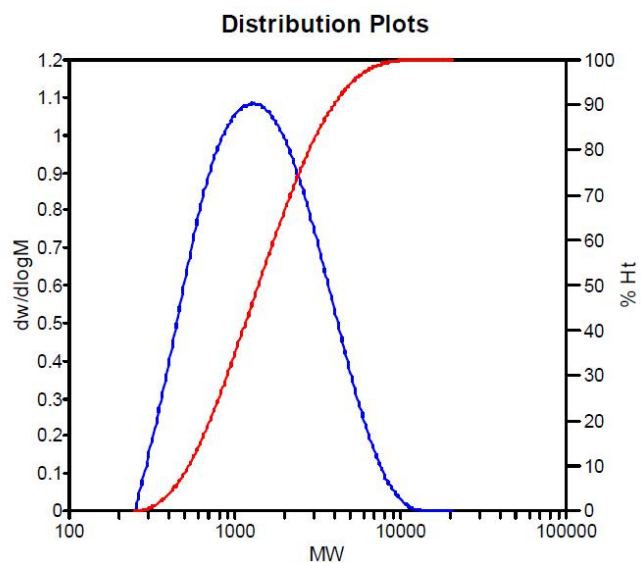

**MW Averages**

| Peak No | Mp   | Mn   | Mw   | Mz   | Mz+1 | Mv   | PD      |
|---------|------|------|------|------|------|------|---------|
| 1       | 1262 | 1080 | 1877 | 3160 | 4634 | 1737 | 1.73796 |

**Figure S79.** GPC trace of the polymer from table 2, entry 13.

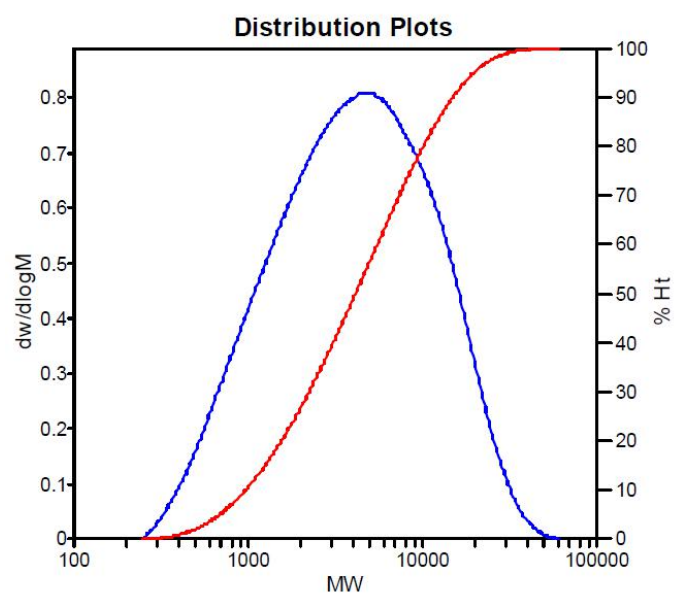

**MW Averages**

| Peak No | Mp   | Mn   | Mw   | Mz    | Mz+1  | Mv   | PD      |
|---------|------|------|------|-------|-------|------|---------|
| 1       | 4895 | 2341 | 6332 | 12911 | 19600 | 5617 | 2.70483 |

**Figure S80.** GPC trace of the polymer from table 2, entry 14.

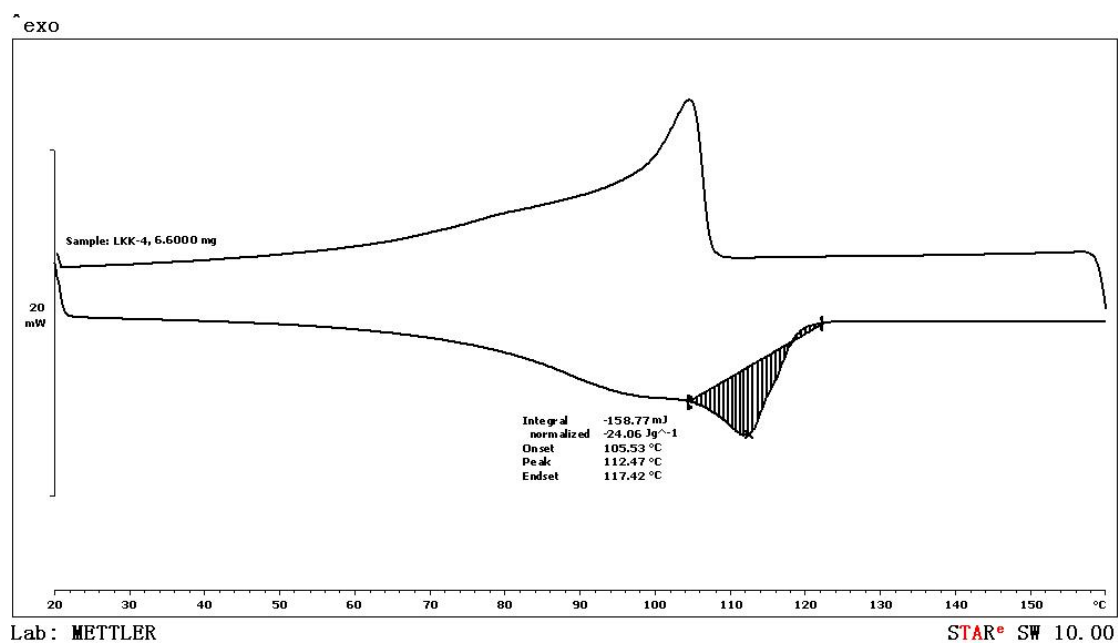

**Figure S81.** DSC data of the polymer from table 1, entry 1.

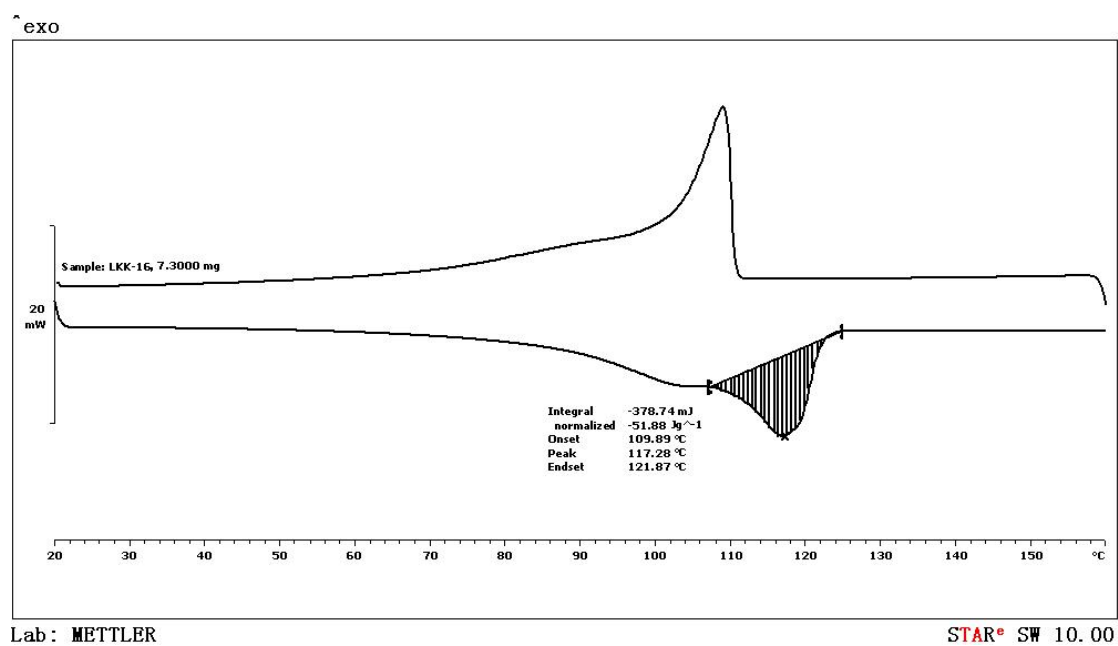

**Figure S82.** DSC data of the polymer from table 1, entry 2.

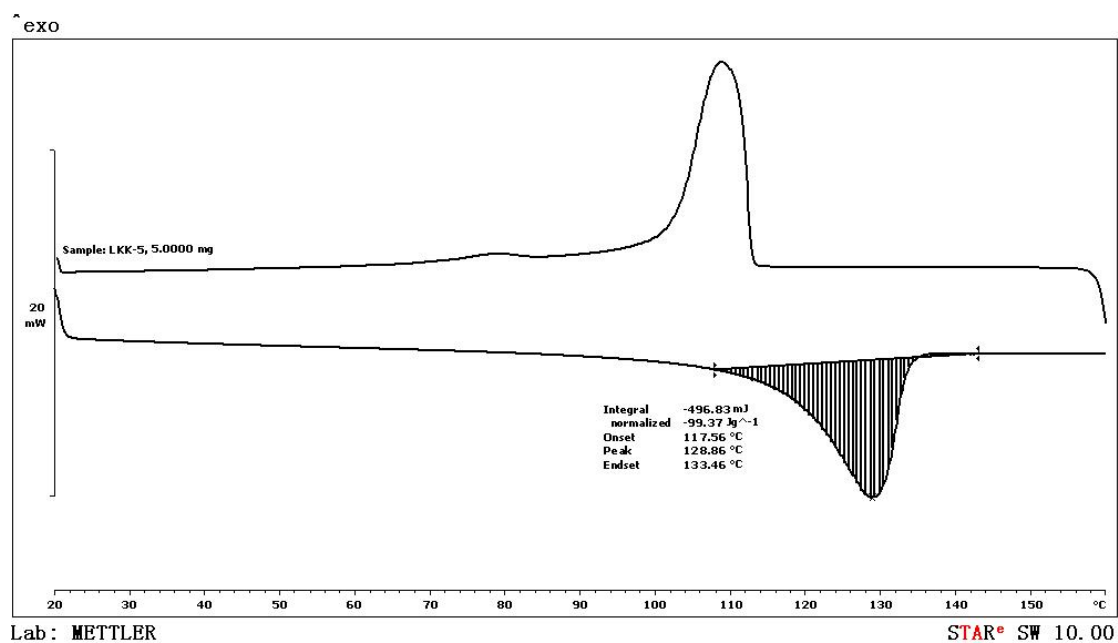

**Figure S83.** DSC data of the polymer from table 1, entry 3.

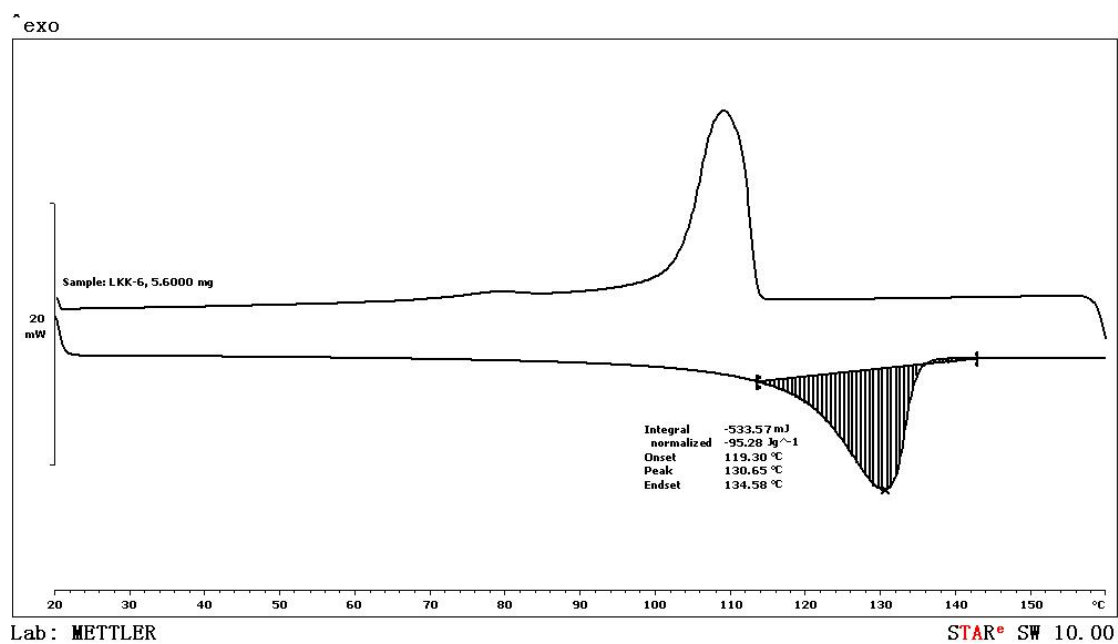

**Figure S84.** DSC data of the polymer from table 1, entry 4.

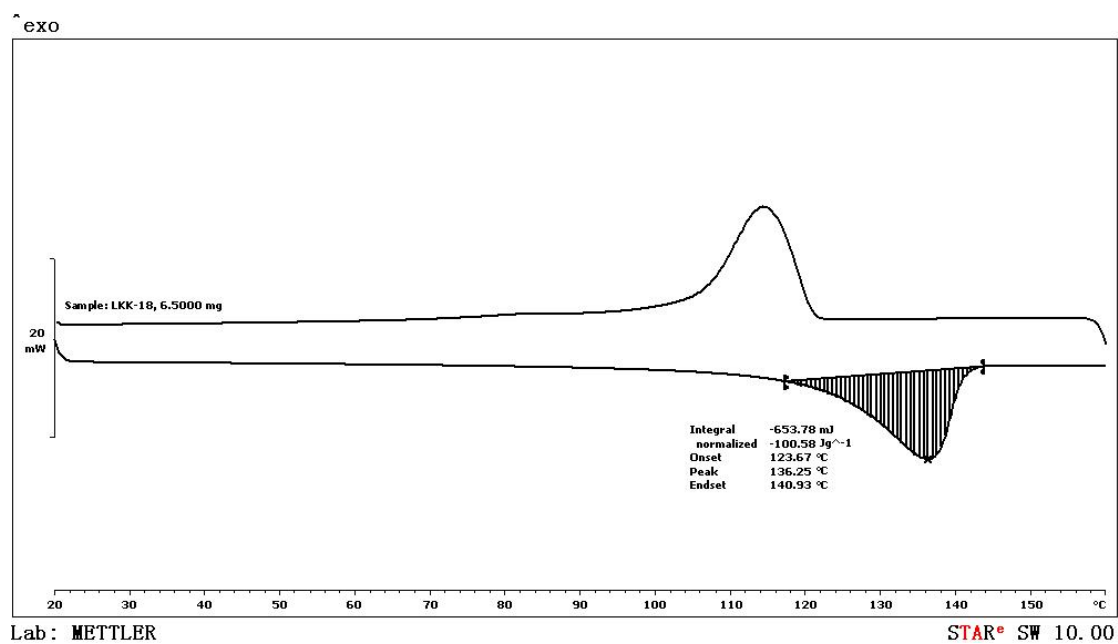

**Figure S85.** DSC data of the polymer from table 1, entry 5.

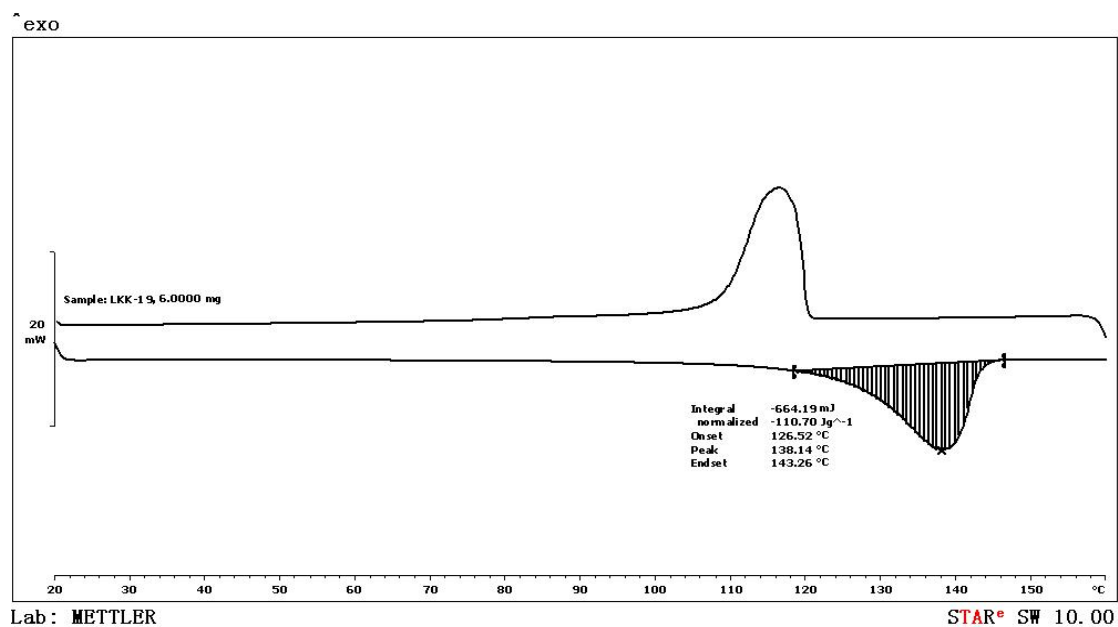

**Figure S86.** DSC data of the polymer from table 1, entry 6.

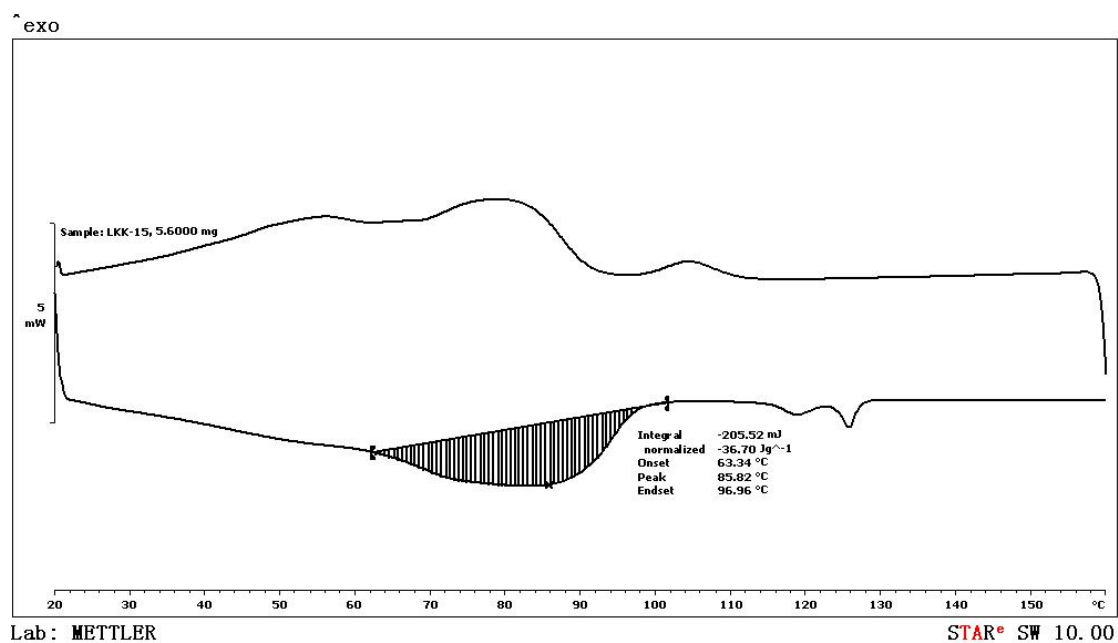

**Figure S87.** DSC data of the polymer from table 1, entry 8.

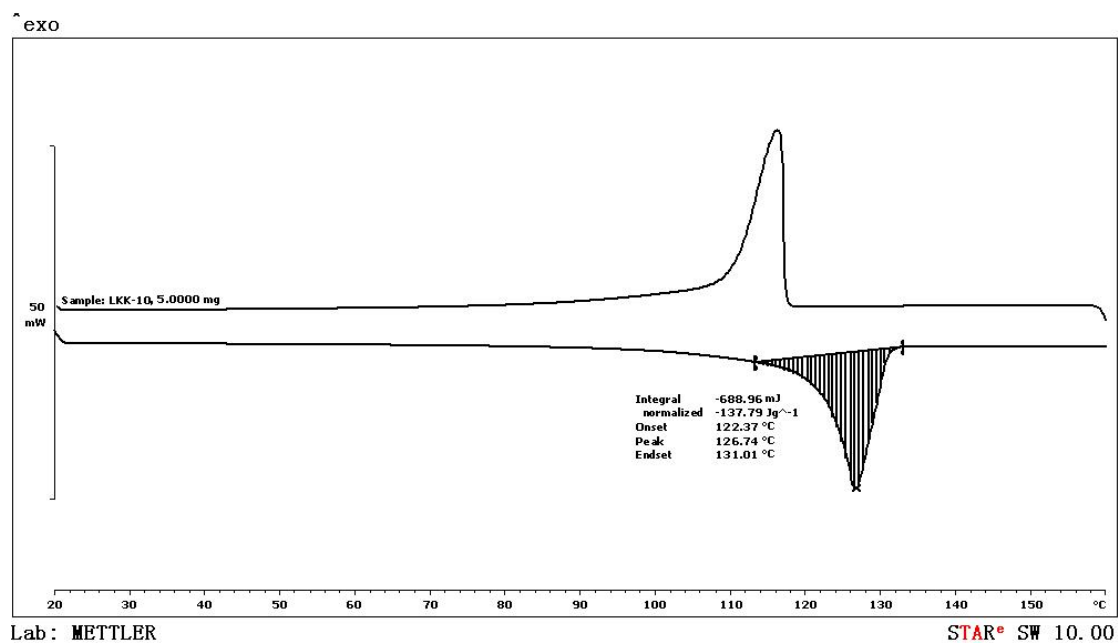

**Figure S88.** DSC data of the polymer from table 1, entry 9.

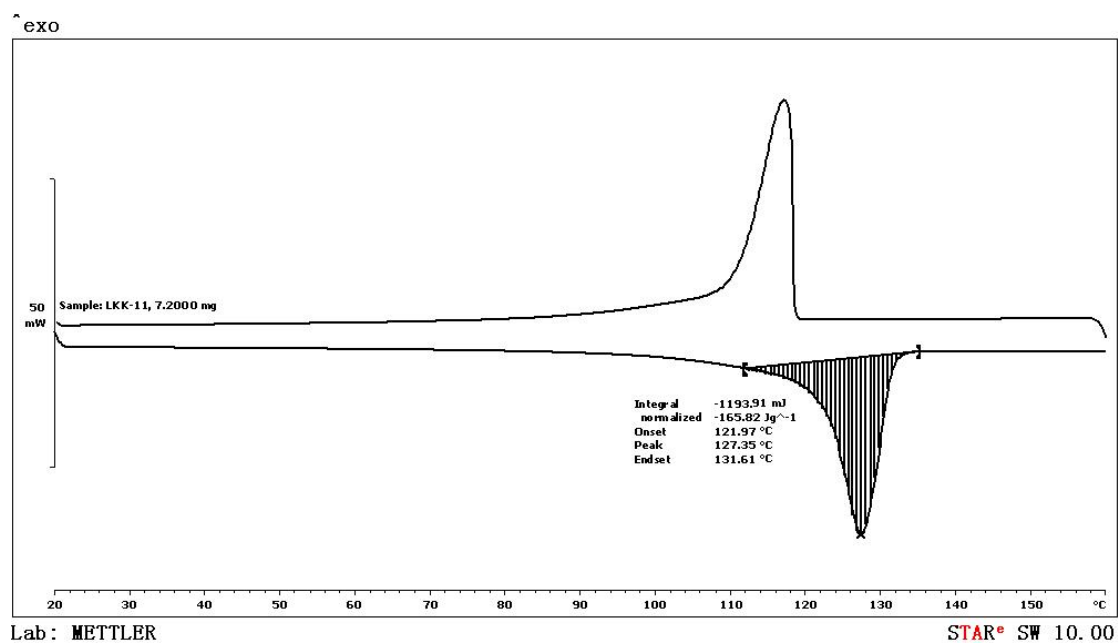

**Figure S89.** DSC data of the polymer from table 1, entry 10.

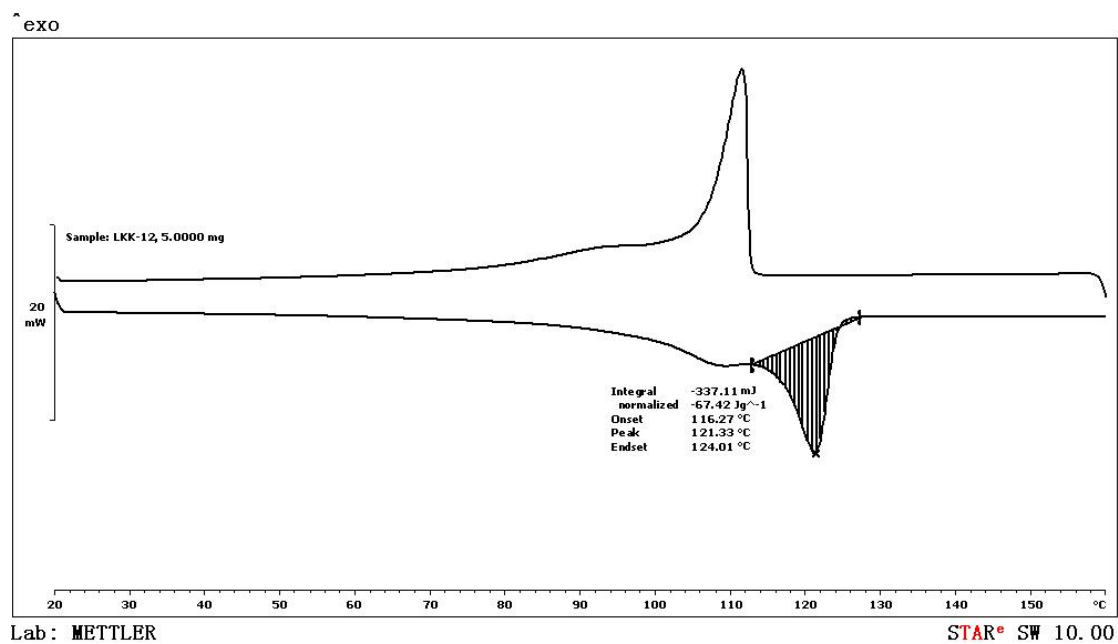

**Figure S90.** DSC data of the polymer from table 1, entry 11.



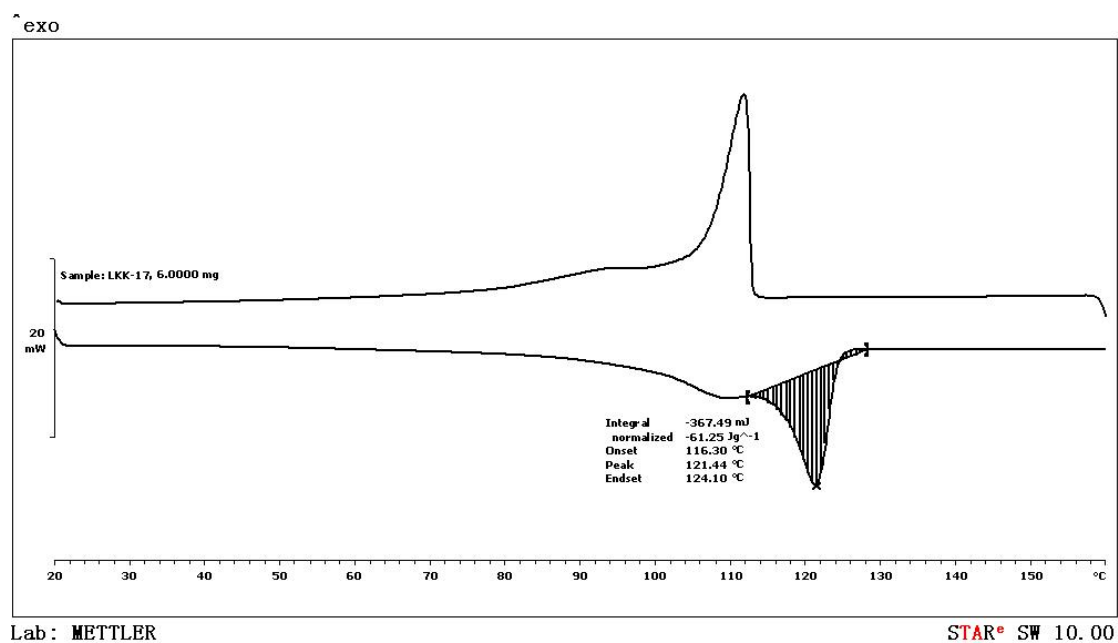

**Figure S91.** DSC data of the polymer from table 1, entry 12.

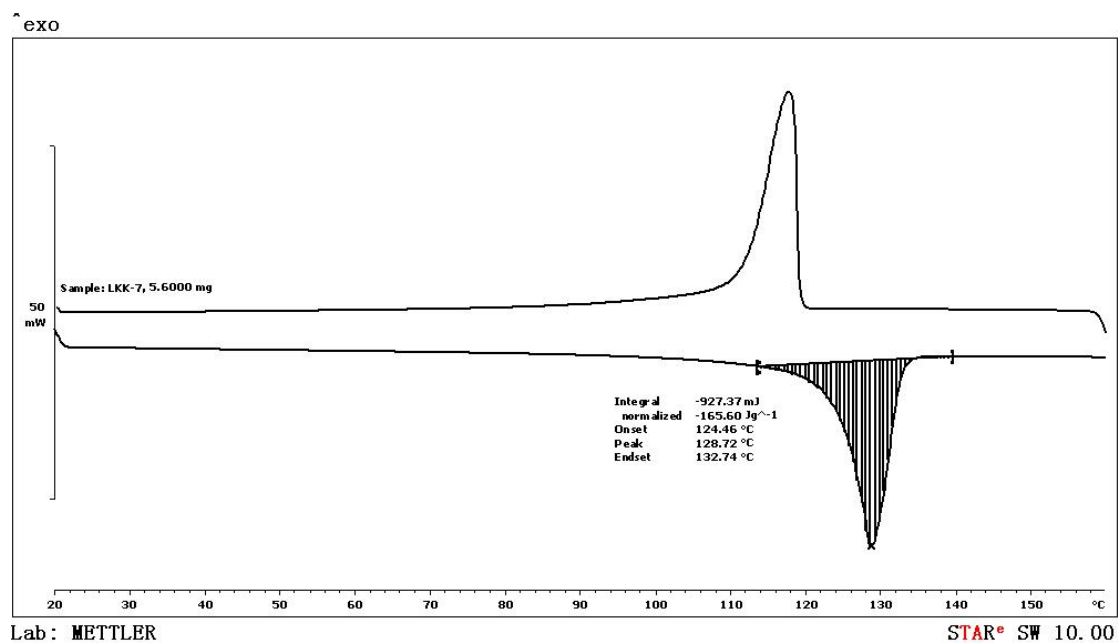

**Figure S92.** DSC data of the polymer from table 1, entry 13

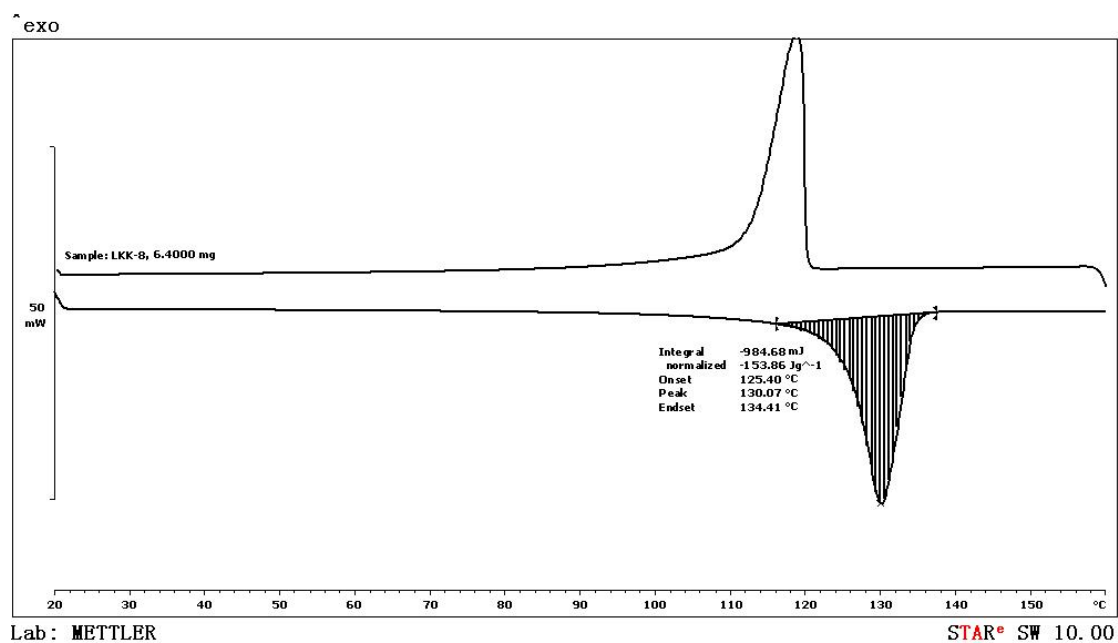

**Figure S93.** DSC data of the polymer from table 1, entry 14.

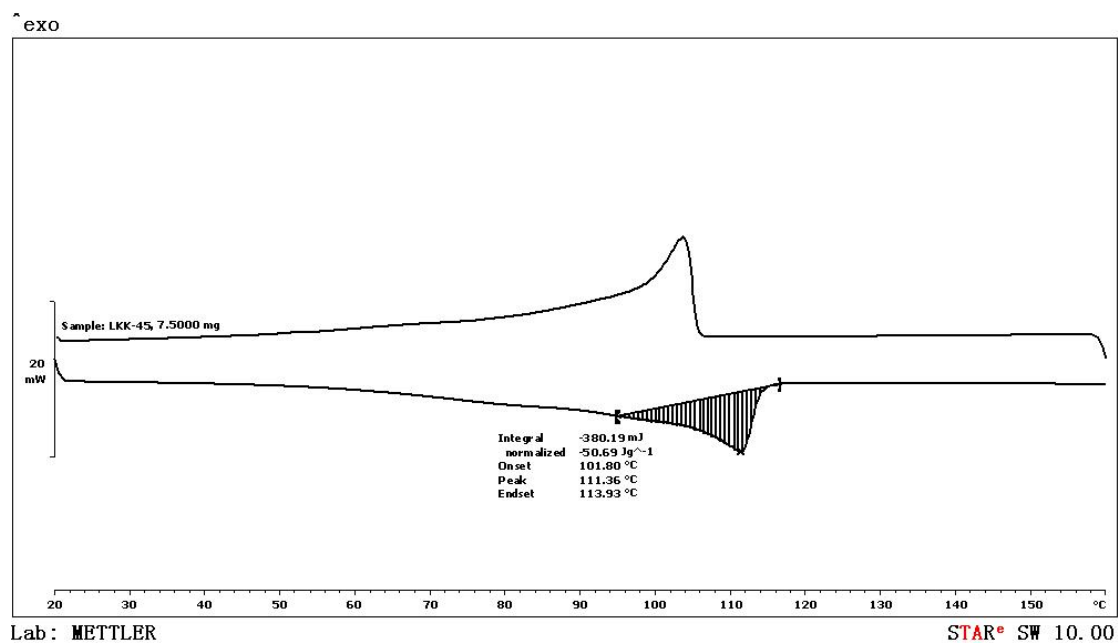

**Figure S94.** DSC data of the polymer from table 2, entry 2.

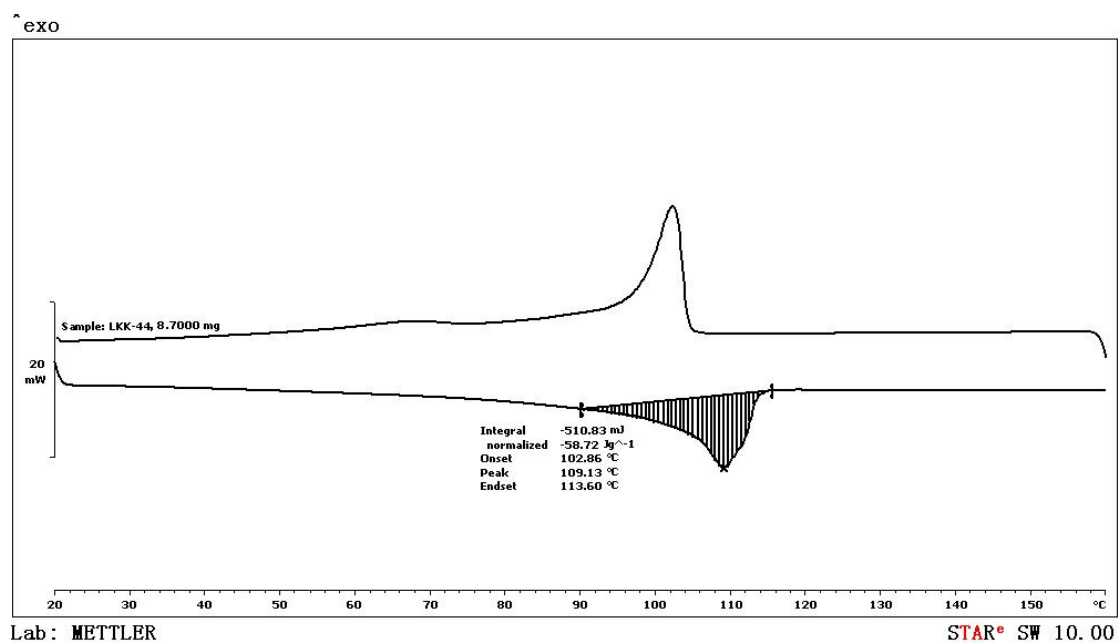

**Figure S95.** DSC data of the polymer from table 2, entry 3.

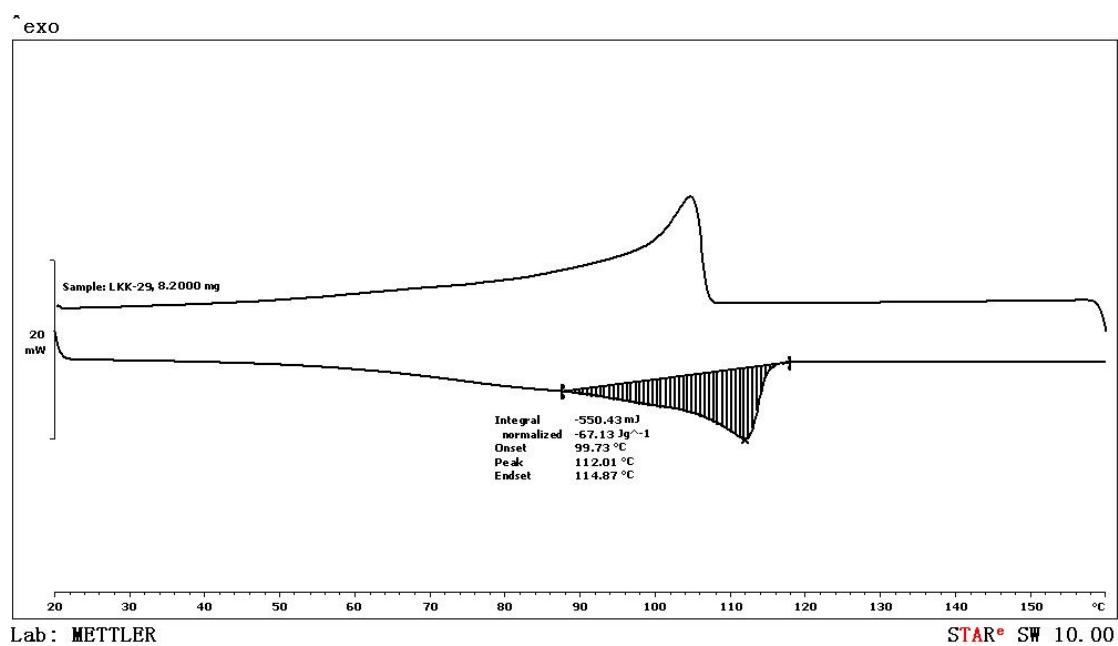

**Figure S96.** DSC data of the polymer from table 2, entry 5.

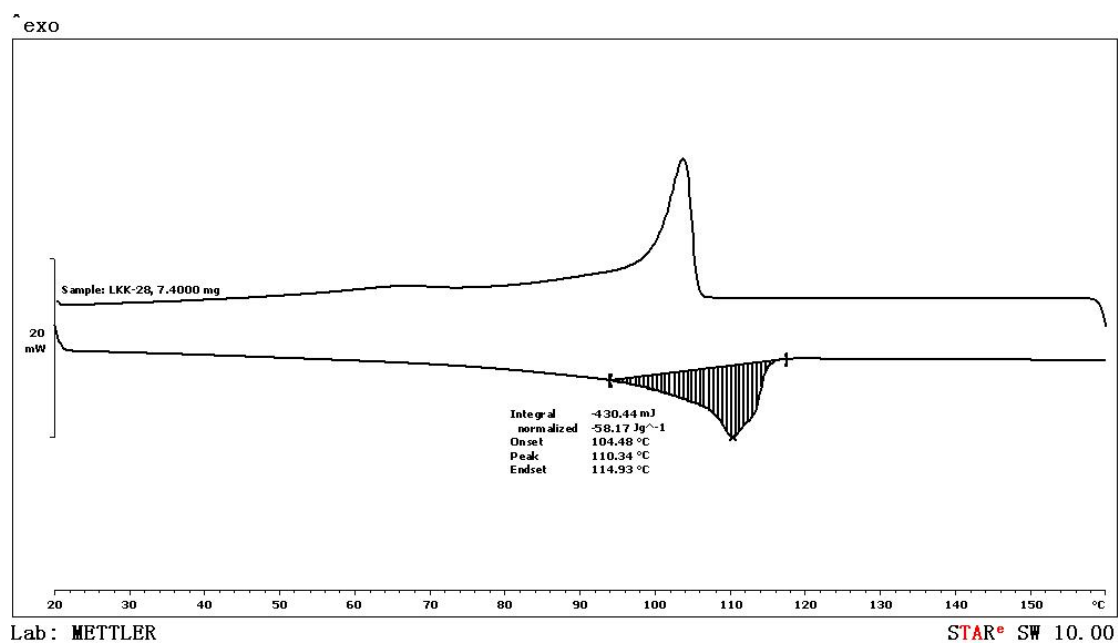

**Figure S97.** DSC data of the polymer from table 2, entry 6.

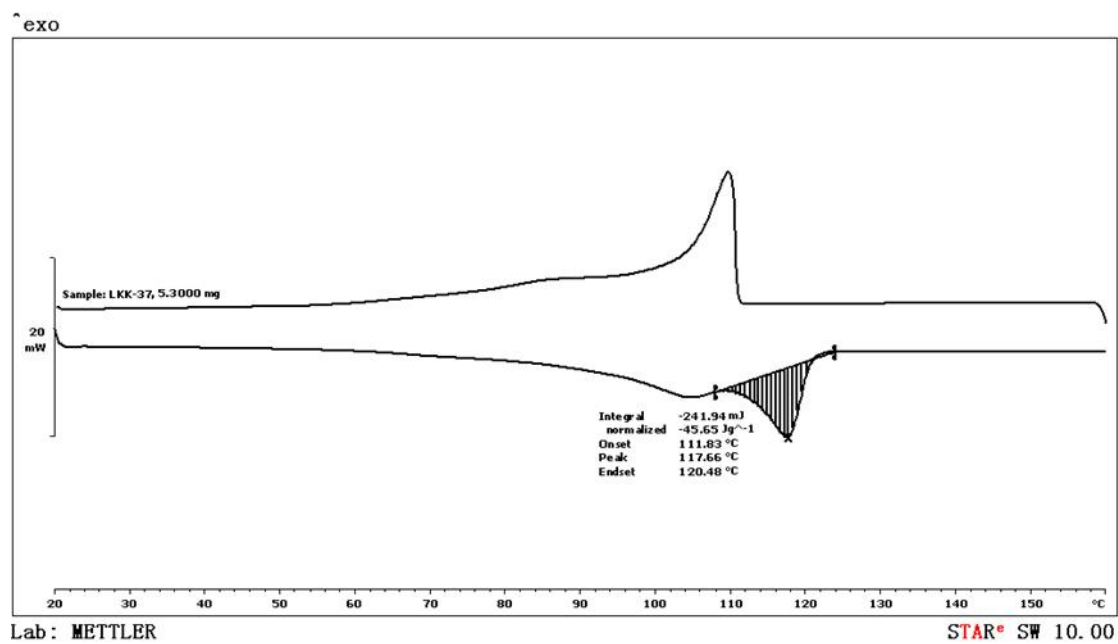

**Figure S98.** DSC data of the polymer from table 2, entry 7.

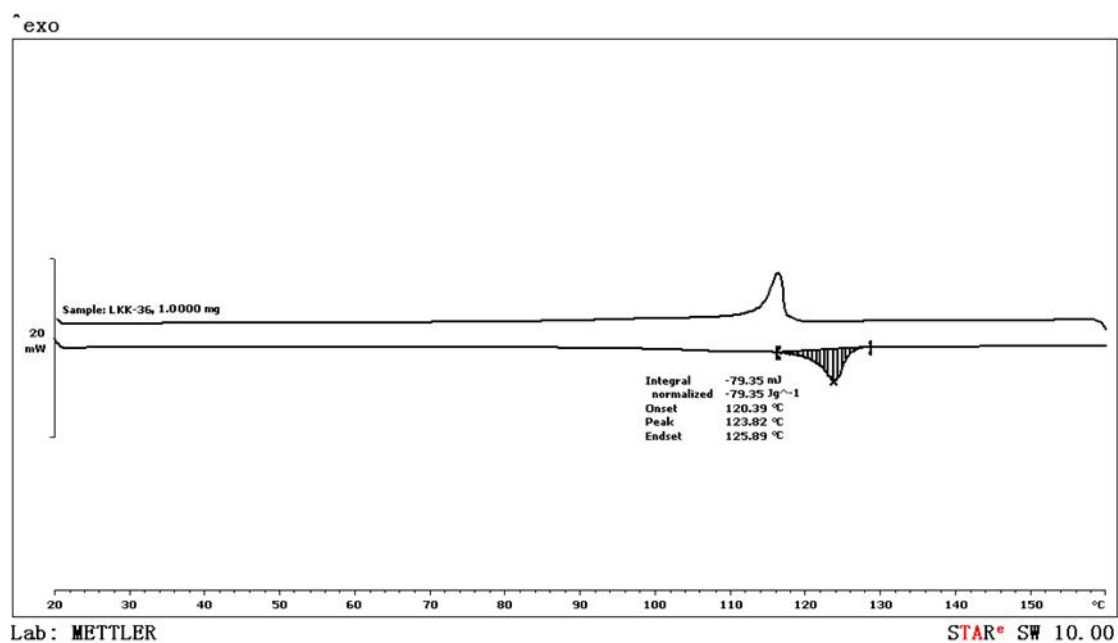

**Figure S99.** DSC data of the polymer from table 2, entry 8.

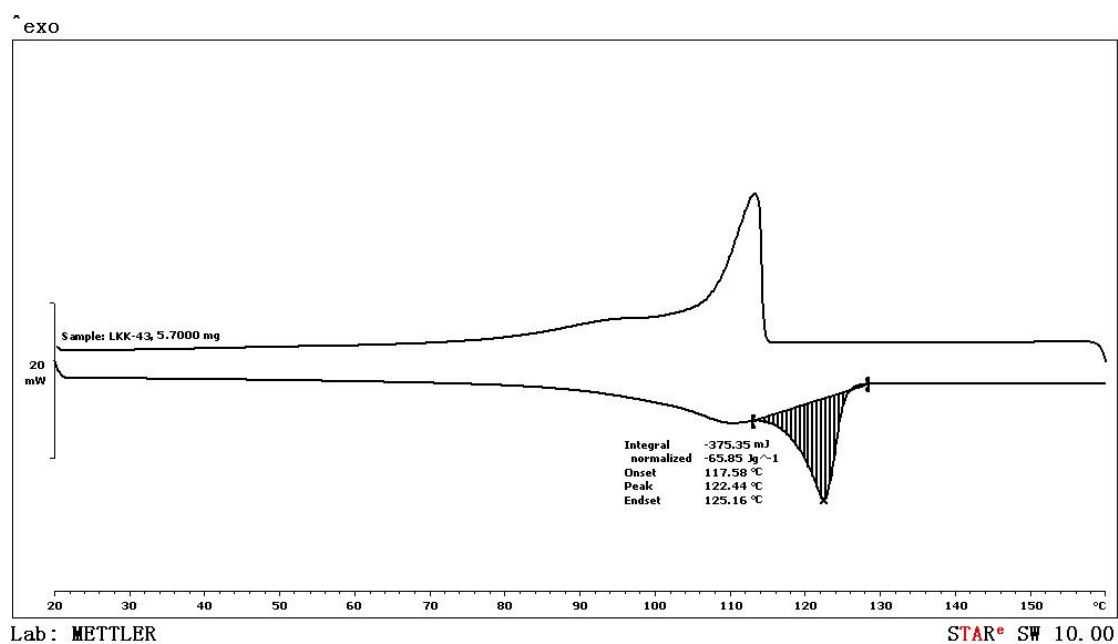

**Figure S100.** DSC data of the polymer from table 2, entry 9.

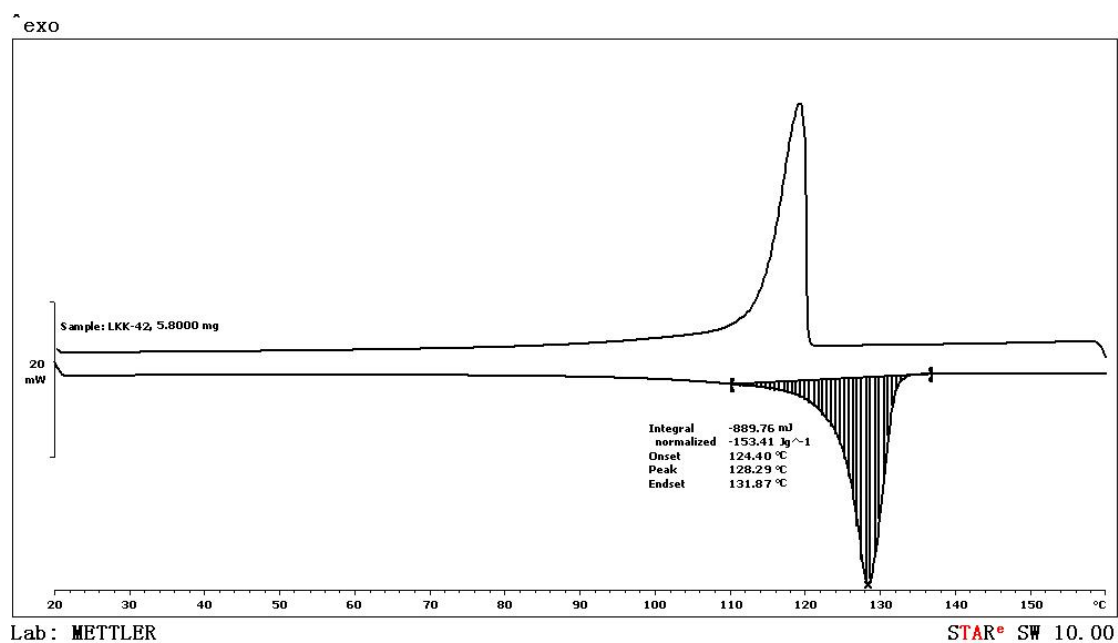

**Figure S101.** DSC data of the polymer from table 2, entry 10.

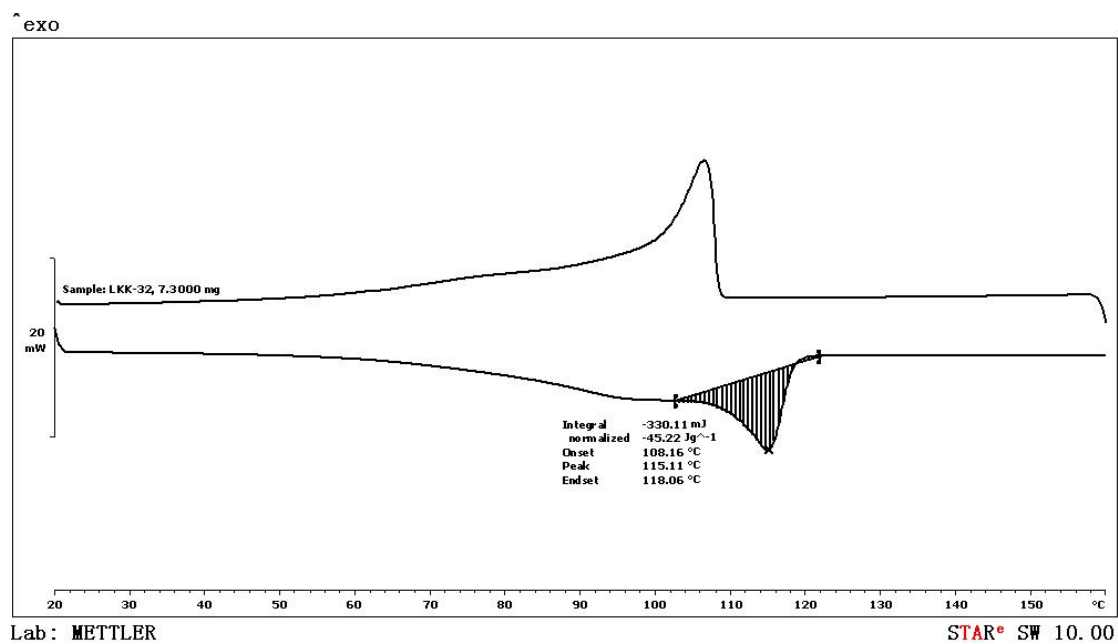

**Figure S102.** DSC data of the polymer from table 2, entry 11.

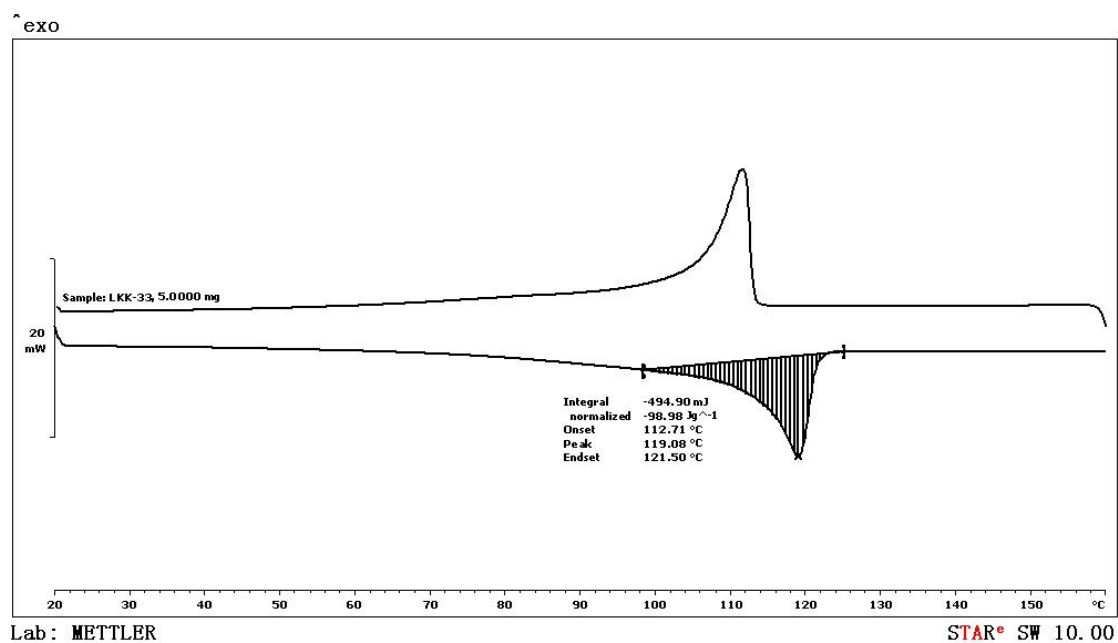

**Figure S103.** DSC data of the polymer from table 2, entry 12.

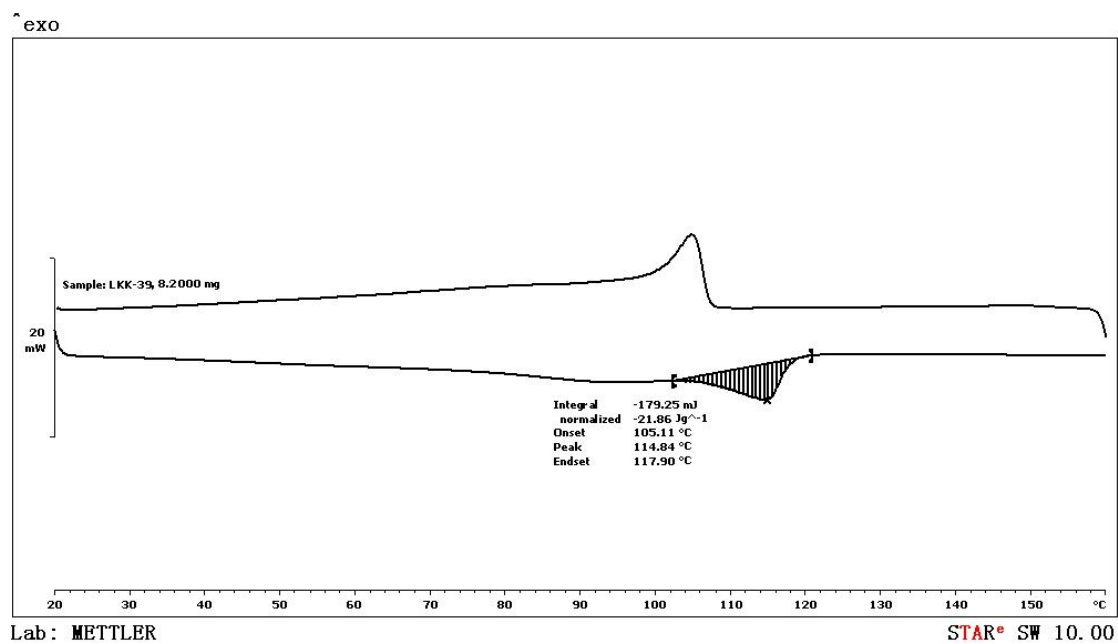

**Figure S104.** DSC data of the polymer from table 2, entry 13.

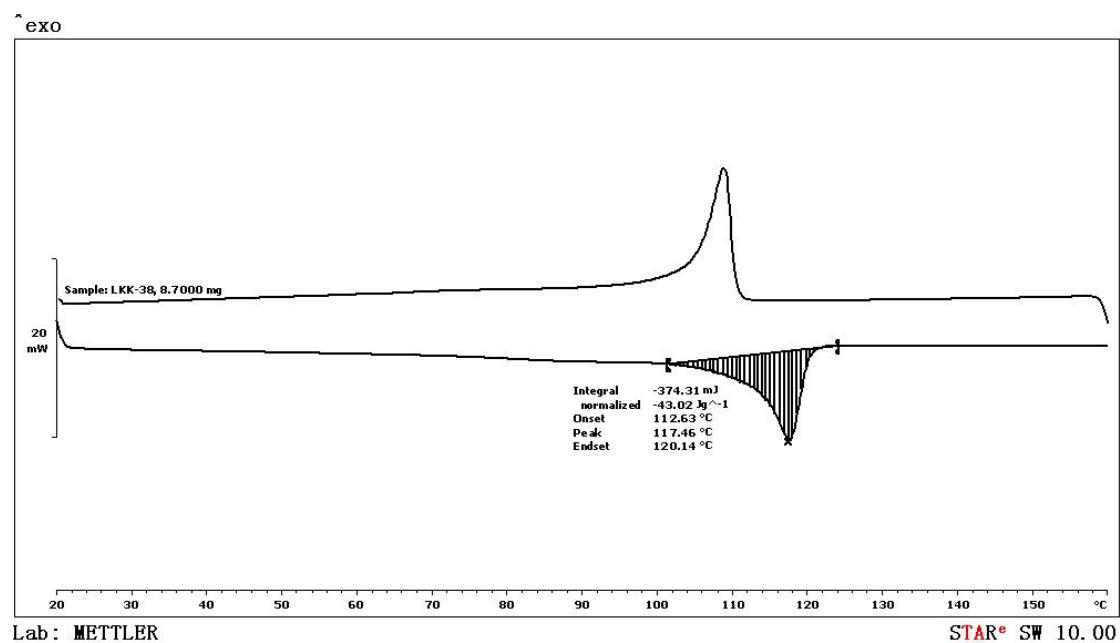

**Figure S105.** DSC data of the polymer from table 2, entry 14.



## 5. Topographic steric maps of palladium catalysts 2e and G

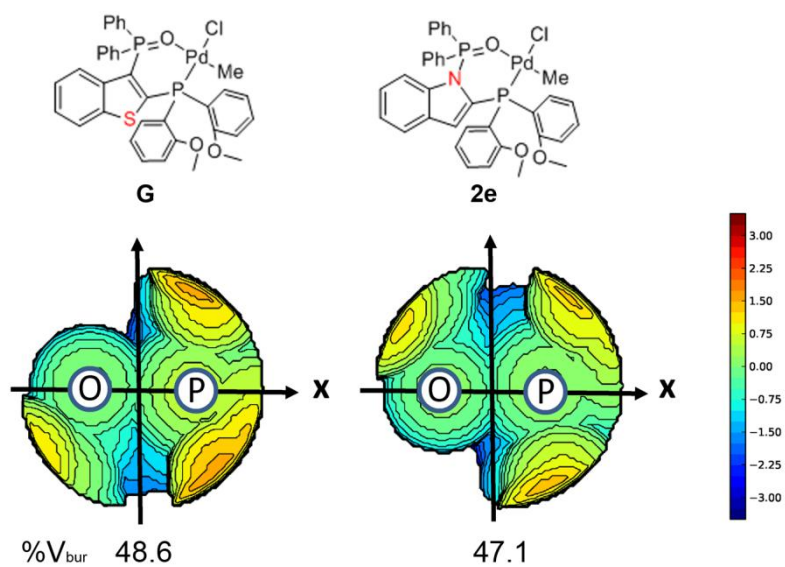

**Figure S106.** Topographic steric maps of palladium catalysts 2e and G.

**6. Table S1.** Crystallographic data for **2c**, **2e** and **2f**.

|                                                                         | <b>2c</b>                                                                         | <b>2e</b>                                                           | <b>2f</b>                                                                                           |
|-------------------------------------------------------------------------|-----------------------------------------------------------------------------------|---------------------------------------------------------------------|-----------------------------------------------------------------------------------------------------|
| Formula                                                                 | C <sub>38</sub> H <sub>45</sub> Cl <sub>4</sub> NO <sub>3</sub> P <sub>2</sub> Pd | C <sub>35</sub> H <sub>32</sub> ClNO <sub>3</sub> P <sub>2</sub> Pd | C <sub>27</sub> H <sub>34</sub> ClN <sub>3</sub> O <sub>3</sub> P <sub>2</sub> Pd+CHCl <sub>3</sub> |
| Formula weight                                                          | 873.89                                                                            | 718.40                                                              | 771.73                                                                                              |
| Crystal dimensions (mm <sup>3</sup> )                                   | 0.20 × 0.10 × 0.10                                                                | 0.30 × 0.23 × 0.10                                                  | 0.36 × 0.20 × 0.11                                                                                  |
| Crystal system                                                          | triclinic                                                                         | triclinic                                                           | triclinic                                                                                           |
| Space group                                                             | P <sup>-1</sup>                                                                   | P <sup>-1</sup>                                                     | P <sup>-1</sup>                                                                                     |
| a (Å)                                                                   | 10.2352(4)                                                                        | 11.0648(4)                                                          | 11.2563(6)                                                                                          |
| b (Å)                                                                   | 14.3325(5)                                                                        | 12.5473(5)                                                          | 12.7674(7)                                                                                          |
| c (Å)                                                                   | 14.8170(5)                                                                        | 15.4261(5)                                                          | 14.3032(8)                                                                                          |
| α (°)                                                                   | 65.2480(10)                                                                       | 78.2720(10)                                                         | 67.146(2)                                                                                           |
| β (°)                                                                   | 83.2000(10)                                                                       | 71.1550(10)                                                         | 74.271(2)                                                                                           |
| γ (°)                                                                   | 79.8140(10)                                                                       | 88.7090(10)                                                         | 78.535(2)                                                                                           |
| Volume (Å <sup>3</sup> )                                                | 1940.40(12)                                                                       | 1982.39(13)                                                         | 1813.12(17)                                                                                         |
| Z                                                                       | 2                                                                                 | 2                                                                   | 2                                                                                                   |
| T (K)                                                                   | 173(2)                                                                            | 173(2)                                                              | 173(2)                                                                                              |
| D <sub>calcd</sub> (g cm <sup>-3</sup> )                                | 1.496                                                                             | 1.204                                                               | 1.414                                                                                               |
| μ (mm <sup>-1</sup> )                                                   | 7.468                                                                             | 5.393                                                               | 7.93                                                                                                |
| F (000)                                                                 | 896                                                                               | 732                                                                 | 784                                                                                                 |
| No. of rflns. collected                                                 | 12056                                                                             | 13025                                                               | 10880                                                                                               |
| No. of indep. rflns. /R <sub>int</sub>                                  | 5422 /0.0407                                                                      | 5418 / 0.0415                                                       | 5023 / 0.0176                                                                                       |
| No. of obsd. rflns. [I <sub>0</sub> > 2σ(I <sub>0</sub> )]              | 4935                                                                              | 5255                                                                | 4789                                                                                                |
| Data / restraints / parameters                                          | 5422 / 0 / 451                                                                    | 5418 / 0 / 391                                                      | 5023 / 12 / 371                                                                                     |
| R <sub>1</sub> / wR <sub>2</sub> [I <sub>0</sub> > 2σ(I <sub>0</sub> )] | 0.0542 / 0.1532                                                                   | 0.0463 / 0.1246                                                     | 0.0564 / 0.1462                                                                                     |
| R <sub>1</sub> / wR <sub>2</sub> (all data)                             | 0.0587 / 0.1606                                                                   | 0.0473 / 0.1257                                                     | 0.0589 / 0.1517                                                                                     |
| GOF (on F <sup>2</sup> )                                                | 1.147                                                                             | 1.065                                                               | 1.041                                                                                               |
| Largest diff. peak and hole (e Å <sup>-3</sup> )                        | 0.837 / -1.249                                                                    | 0.872 / -1.207                                                      | 1.703 / -1.796                                                                                      |
| CCDC No.                                                                | 1955275                                                                           | 1955170                                                             | 1962725                                                                                             |
